# Supplementary material for: Pseudorotaxane orientational stereoisomerism driven by π-electron density
Source: Royal Society of Chemistry journal article supplement (doi:10.1039/c4cc04668d), 2014-07-08
Supplement: c4cc04668d1.pdf [file c4cc04668d1.pdf]

# Supporting Information

## **Pseudorotaxane Orientational Stereoisomerism Driven by $\pi$ -Electron Density**

*Carmine Gaeta,\* Carmen Talotta, and Placido Neri\**

*Dipartimento di Chimica e Biologia, Università di Salerno,  
Via Giovanni Paolo II 132, I-84084 Fisciano (Salerno), Italy  
E-mail: neri@unisa.it, cgaeta@unisa.it*

## TABLE OF CONTENTS

|                                                                                                                   |         |
|-------------------------------------------------------------------------------------------------------------------|---------|
| General comments                                                                                                  | S2      |
| General procedure for the synthesis of <b>3a-d</b> <sup>+</sup> ·TFPB <sup>-</sup> salts                          | S4      |
| Synthesis of <b>4b-e</b> <sup>+</sup> ·TFPB <sup>-</sup> salts                                                    | S9      |
| <sup>1</sup> H and <sup>13</sup> C NMR spectra of <b>8a-d</b> <sup>+</sup> ·Cl <sup>-</sup> salts                 | S14     |
| <sup>1</sup> H and <sup>13</sup> C NMR spectra of <b>3a-d</b> <sup>+</sup> ·TFPB <sup>-</sup> salts               | S22     |
| <sup>1</sup> H and <sup>13</sup> C NMR spectra of <b>10c-e</b> <sup>+</sup> ·Cl <sup>-</sup> salts                | S30     |
| <sup>1</sup> H and <sup>13</sup> C NMR spectra of <b>4b-f</b> <sup>+</sup> ·TFPB <sup>-</sup> salts               | S36     |
| Preparation of pseudorotaxanes <b>6a-e</b> <sup>+</sup> and <b>7a-d</b> <sup>+</sup>                              | S44     |
| Determination of pseudorotaxane $K_{\text{ass}}$ values by quantitative NMR analysis                              | S44     |
| <sup>1</sup> H NMR spectrum of pseudorotaxane <b>6b</b> <sup>+</sup> ·TFPB <sup>-</sup>                           | S45     |
| <sup>1</sup> H NMR spectrum of pseudorotaxane <b>6c</b> <sup>+</sup> ·TFPB <sup>-</sup>                           | S46     |
| <sup>1</sup> H NMR spectrum of pseudorotaxane <b>6d</b> <sup>+</sup> ·TFPB <sup>-</sup>                           | S47     |
| <sup>1</sup> H NMR spectrum of pseudorotaxane <b>6e</b> <sup>+</sup> ·TFPB <sup>-</sup>                           | S48     |
| 2D COSY spectrum of an equimolar mixture of <b>1</b> and <b>3a</b> <sup>+</sup>                                   | S49     |
| 2D COSY spectrum of an equimolar mixture of <b>1</b> and <b>3b</b> <sup>+</sup>                                   | S50     |
| 2D COSY spectrum of an equimolar mixture of <b>1</b> and <b>3c</b> <sup>+</sup>                                   | S51     |
| 2D COSY spectrum of an equimolar mixture of <b>1</b> and <b>3d</b> <sup>+</sup>                                   | S52     |
| Hammett-type plot                                                                                                 | S53     |
| Details of the optimized structure of <i>endo-p</i> -NO <sub>2</sub> -benzyl- <b>7a</b> <sup>+</sup> complex      | S54     |
| Details of the optimized structure of <i>endo</i> -benzyl- <b>7a</b> <sup>+</sup> complex                         | S55-S56 |
| <sup>1</sup> H NMR titration of hexamethoxy- <i>p</i> -NO <sub>2</sub> -calix[6]arene with <b>4a</b> <sup>+</sup> | S57     |

## GENERAL COMMENTS

ESI(+)-MS measurements were performed on a triple quadrupole mass spectrometer equipped with electrospray ion source, using a mixture of H<sub>2</sub>O/CH<sub>3</sub>CN (1:1) and 5% HCOOH as solvent. All chemicals were reagent grade and were used without further purification. Anhydrous solvents were purchased from Aldrich. When necessary compounds were dried *in vacuo* over CaCl<sub>2</sub>. Reaction temperatures were measured externally. Reactions were monitored by TLC on Merck silica gel plates (0.25 mm) and visualized by UV light, or by spraying with H<sub>2</sub>SO<sub>4</sub>-Ce(SO<sub>4</sub>)<sub>2</sub>.

Derivatives **1**, **2**<sup>+</sup>, **4a**<sup>+</sup>, **11c**<sup>+</sup>, and sodium tetrakis[3,5-bis(trifluoromethyl)phenyl]borate, were synthesized according to literature procedures.<sup>1</sup>

NMR spectra were recorded on a Bruker Avance-600 spectrometer [600 (<sup>1</sup>H) and 150 MHz (<sup>13</sup>C)], Bruker Avance-400 spectrometer [400 (<sup>1</sup>H) and 100 MHz (<sup>13</sup>C)], Bruker Avance-300 spectrometer [300 (<sup>1</sup>H) and 75 MHz (<sup>13</sup>C)], or Bruker Avance-250 spectrometer [250 (<sup>1</sup>H) and 63 MHz (<sup>13</sup>C)]; chemical shifts are reported relative to the residual solvent peak (CHCl<sub>3</sub>: δ 7.26, CDCl<sub>3</sub>: δ 77.23; CD<sub>3</sub>OH: δ 4.87, CD<sub>3</sub>OD: δ 49.0). A standard pulse program, provided by the manufacturer, was used for 2D COSY experiments.

Full geometry optimizations have been carried out with the B3LYP density functional with the standard 6-31G(d,p) basis set with the Gaussian 09 package.<sup>2</sup> All calculations included Grimme's dispersion<sup>3</sup> correction, present in Gaussian 09, using IOp(3/124 = 3). Single-point calculations were carried out at M06/6-31+G(d,p) level of theory. GaussianView 5.0.8W was used in the calculation of ESP at the B3LYP/6-31G(d,p) level. The input structures for ESP calculations were optimized at the B3LYP/6-31G(d,p) level of theory.

---

<sup>1</sup>a) Gaeta, C.; Troisi, F.; Neri, P. *Org. Lett.* **2010**, *12*, 2092–2095; b) Nishida, H.; Takada, N.; Yoshimura, M.; Sonoda, T.; Kobayashi, H. *Bull. Chem. Soc. Jpn.* **1984**, *57*, 2600–2604; c) Gaeta, C.; Talotta, C.; Farina, F.; Camalli, M.; Campi, G.; Neri, P. *Chem. Eur. J.* **2012**, *18*, 1219–1230; d) Ikeda, A.; Nagasaki, T.; Araki, K.; Shinkai, S. *Tetrahedron* **1992**, *48*, 1059–1070; e) Sutter, M.; Pehlivan, L.; Lafon, R.; Dayoub, W.; Raoul, Y.; Métaya, E.; Lemaire, M. *Gren Chem.*, **2013**, *15*, 3020–3026.

<sup>2</sup>Frisch, M. J.; Trucks, G. W.; Schlegel, H. B.; Scuseria, G. E.; Robb, M. A.; Cheeseman, J. R.; Scalmani, G.; Barone, V.; Mennucci, B.; Petersson, G. A.; Nakatsuji, H.; Caricato, M.; Li, X.; Hratchian, H. P.; Izmaylov, A. F.; Bloino, J.; Zheng, G.; Sonnenberg, J. L.; Hada, M.; Ehara, M.; Toyota, K.; Fukuda, R.; Hasegawa, J.; Ishida, M.; Nakajima, T.; Honda, Y.; Kitao, O.; Nakai, H.; Vreven, T.; Montgomery, J. A., Jr.; Peralta, J. E.; Ogliaro, F.; Bearpark, M.; Heyd, J. J.; Brothers, E.; Kudin, K. N.; Staroverov, V. N.; Kobayashi, R.; Normand, J.; Raghavachari, K.; Rendell, A.; Burant, J. C.; Iyengar, S. S.; Tomasi, J.; Cossi, M.; Rega, N.; Millam, J. M.; Klene, M.; Knox, J. E.; Cross, J. B.; Bakken, V.; Adamo, C.; Jaramillo, J.; Gomperts, R.; Stratmann, R. E.; Yazyev, O.; Austin, A. J.; Cammi, R.; Pomelli, C.; Ochterski, J. W.; Martin, R. L.; Morokuma, K.; Zakrzewski, V. G.; Voth, G. A.; Salvador, P.; Dannenberg, J. J.; Dapprich, S.; Daniels, A. D.; Farkas, Ö.; Foresman, J. B.; Ortiz, J. V.; Cioslowski, J.; Fox, D. J. Gaussian, Inc.: Wallingford CT, 2009.

<sup>3</sup> Grimme, S. *J. Comput. Chem.* **2006**, *27*, 1787–1799.

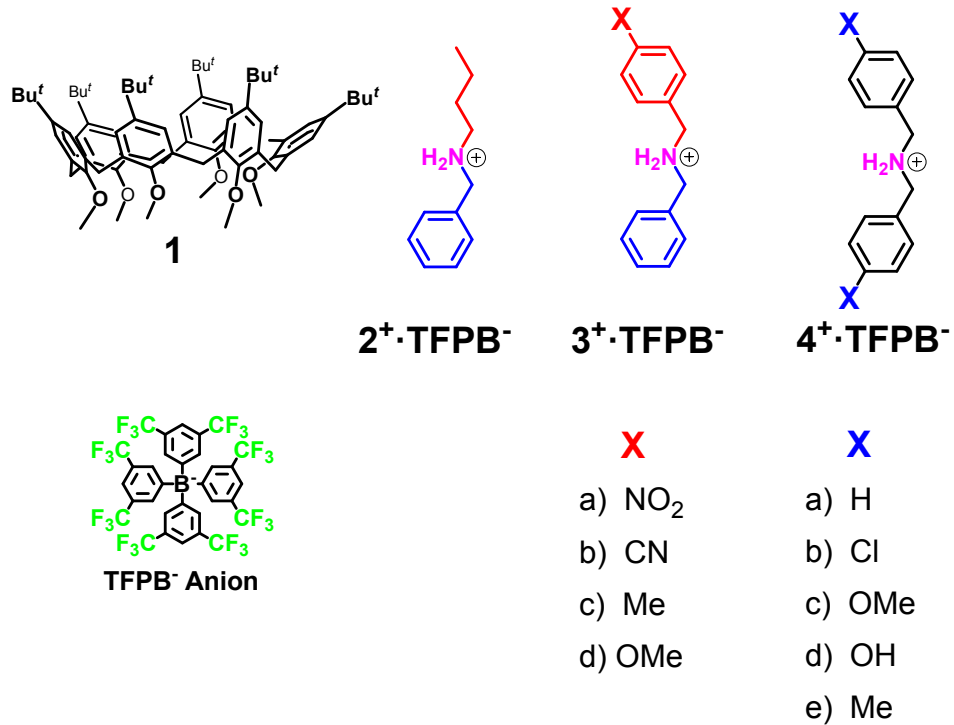

## Chart S1

## General procedure for the synthesis of $3a-d^+ \cdot TFPB^-$ salts

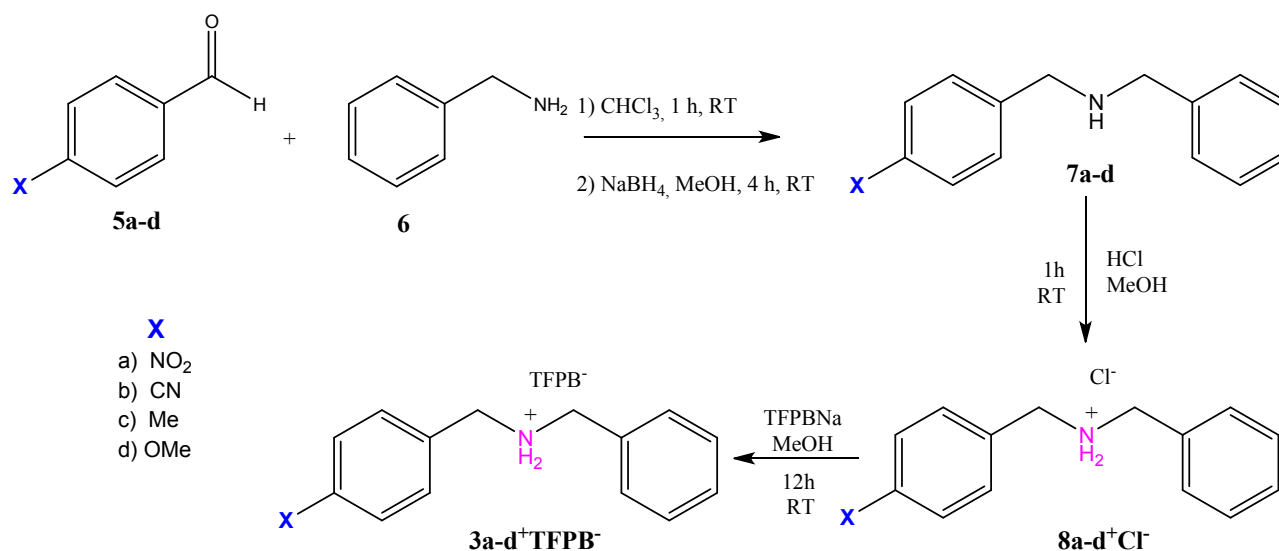

To a solution of aldehyde **5a-d** (5.0 mmol) in  $\text{CHCl}_3$  (5 mL) was added benzylamine **6** (5.0 mmol). The reaction mixture was stirred at room temperature for 1 h. The solvent was evaporated to give the imine intermediate in quantitative yield as a yellow solid. The solid was used for the next step without further purification. The imine was dissolved in dry MeOH (50 mL) under a nitrogen atmosphere and  $\text{NaBH}_4$  (50.0 mmol) was added at  $0^\circ\text{C}$  and then the mixture was allowed to warm at room temperature. The solution was kept under stirring for 4 h. The solvent was removed under reduced pressure and the residue partitioned between AcOEt (100 mL) and a saturated aqueous solution of  $\text{NaHCO}_3$  (100 mL). The organic layer was dried over  $\text{MgSO}_4$  and the solvent was removed under reduced pressure, to give secondary amine **7a-d** as a yellow solid. The solid was used for the next step without further purification. The crude product was dissolved in MeOH at room temperature and an aqueous solution of HCl (37% w/w, 10 mmol) was added dropwise. The mixture was kept under stirring for 1 h, until a white precipitate was formed. The solid was collected by filtration, washed with MeOH (10 mL) and  $\text{CH}_3\text{CN}$  (10 mL), and dried under vacuum to give salt **8a-d** $^+ \cdot \text{Cl}^-$  as a white solid. Derivative **8a-d** $^+ \cdot \text{Cl}^-$  (2.0 mmol) was dissolved in warm dry MeOH (20 mL), then a solution of sodium tetrakis[3,5-bis(trifluoromethyl)phenyl]borate (2.0 mmol) in dry MeOH (10 mL) was added. The mixture was kept under stirring overnight in the dark. The solvent was removed and deionized water was added, obtaining a brown precipitate that was filtered off and dried under vacuum to give salt **3a-d** $^+ \cdot \text{TFPB}^-$ .

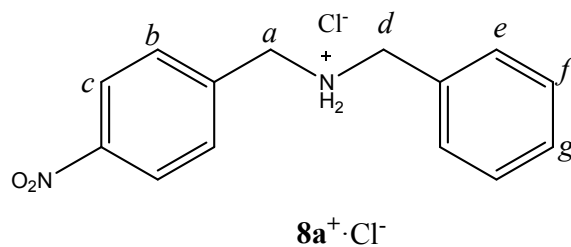

**Derivative 8a<sup>+</sup>·Cl<sup>-</sup>**: (1.19 g, 4.3 mmol, 86%). **ESI(+)** MS:  $m/z = 267.2$  ( $\text{M}^+$ ). **<sup>1</sup>H NMR** (300 MHz,  $\text{CD}_3\text{OD}$ , 298 K):  $\delta$  4.03 (s, 2H,  $\text{H}_d$ ), 4.04 (s, 2H,  $\text{H}_a$ ), 7.45-7.52- (overlapped, 5H,  $\text{H}_{e-f-g}$ ), 7.76 (d,  $J = 6\text{Hz}$ , 2H,  $\text{H}_b$ ), 8.29 (d,  $J = 6\text{Hz}$ , 2H,  $\text{H}_c$ ); **<sup>13</sup>C NMR** (75 MHz,  $\text{CD}_3\text{OD}$ , 298 K):  $\delta$  49.8, 51.3, 123.8, 129.1, 129.6, 129.9, 130.9, 131.2, 138.2, 148.8. Anal. Calcd for  $\text{C}_{14}\text{H}_{15}\text{ClN}_2\text{O}_2$ : C, 60.33; H, 5.42. Found: C, 60.41; H, 5.33.

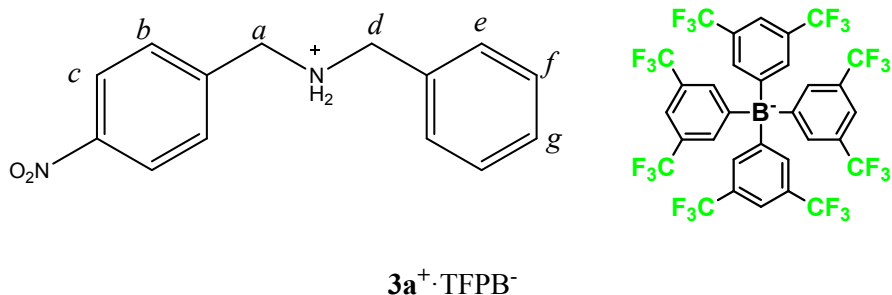

**Derivative 3a<sup>+</sup>·TFPB<sup>-</sup>**: (1.97 g, 1.78 mmol, 89%). **ESI(+)** MS:  $m/z = 267.2$  ( $\text{M}^+$ ). **<sup>1</sup>H NMR** (400 MHz,  $\text{CD}_3\text{OD}$ , 298 K): 4.28 (s, 2H,  $\text{H}_d$ ), 4.38 (s, 2H,  $\text{H}_a$ ), 7.47 (overlapped, 5H,  $\text{H}_{e-g}$ ), 7.58 (overlapped, 12H,  $\text{ArH}^{\text{TFPB}}$ ), 7.72 (d,  $J = 8.4\text{Hz}$ , 2H,  $\text{H}_b$ ), 8.31 (d,  $J = 8.4\text{Hz}$ , 2H,  $\text{H}_c$ ); **<sup>13</sup>C NMR** (100 MHz,  $\text{CD}_3\text{OD}$ , 298 K):  $\delta$  49.7, 51.2, 117.1, 120.3, 123.0, 123.7, 125.7, 128.4, 128.9, 129.2, 129.2, 129.4, 129.6, 130.8, 130.9, 134.4, 138.1, 148.6, 160.7, 161.2, 161.7, 162.2. Anal. Calcd for  $\text{C}_{46}\text{H}_{27}\text{BF}_{24}\text{N}_2\text{O}_2$ : C, 49.93; H, 2.46. Found: C, 50.02; H, 2.39.

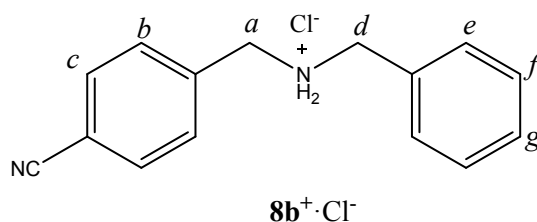

**Derivative 8b<sup>+</sup>·Cl<sup>-</sup>**: (1.19 g, 4.6 mmol, 92%). **ESI(+)** MS:  $m/z = 222.6$  (M<sup>+</sup>). **<sup>1</sup>H NMR** (300 MHz, CD<sub>3</sub>OD, 298 K):  $\delta$  4.30-4.35 (overlapped, 4H, H<sub>a,d</sub>), 7.45-7.80 (overlapped, 9H, H<sub>e-g</sub> H<sub>b</sub>+ H<sub>c</sub>); **<sup>13</sup>C NMR** (75 MHz, CD<sub>3</sub>OD, 298 K):  $\delta$  49.9, 51.2, 113.3, 129.1, 129.6, 129.9, 130.8, 132.7, 136.4. Anal. Calcd for C<sub>15</sub>H<sub>15</sub>ClN<sub>2</sub>: C, 69.63; H, 5.84. Found: C, 69.72; H, 5.75.

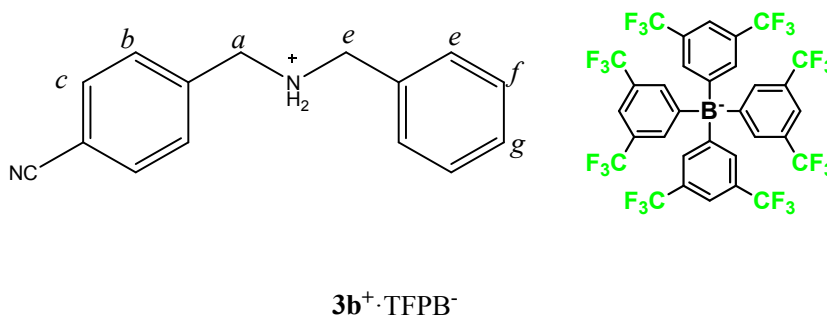

**Derivative 3b<sup>+</sup>·TFPB<sup>-</sup>**: (2.13 g, 1.96 mmol, 98%). **ESI(+)** MS:  $m/z = 222.6$  (M<sup>+</sup>). **<sup>1</sup>H NMR** (400 MHz, CD<sub>3</sub>OD, 298 K):  $\delta$  4.24 (s, 2H, H<sub>d</sub>), 4.32 (s, 2H, H<sub>a</sub>), 7.47 (overlapped, 5H, H<sub>e-g</sub>), 7.58 (overlapped, 12H, Ar<sup>TFPB</sup>), 7.64 (d,  $J = 9.2$ Hz, 2H, H<sub>b</sub>), 7.82 (d,  $J = 9.2$ Hz, 2H, H<sub>c</sub>); **<sup>13</sup>C NMR** (100 MHz, CD<sub>3</sub>OD, 298 K):  $\delta$ ; 51.4, 52.6, 114.6, 118.4, 118.9, 121.7, 124.4, 127.1, 129.8, 129.9, 130.3, 130.4, 130.6, 130.8, 131.0, 131.9, 132.3, 134.0, 135.8, 137.8, 162.1, 162.6, 163.1, 163.6. Anal. Calcd for C<sub>47</sub>H<sub>27</sub>BF<sub>24</sub>N<sub>2</sub>: C, 51.96; H, 2.50. Found: C, 52.05; H, 2.42.

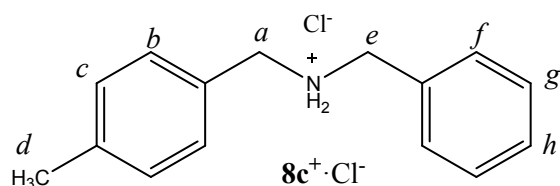

**Derivative 8c<sup>+</sup>·Cl<sup>-</sup>:** (1.00 g, 4.05 mmol, 81%). **ESI(+)** MS:  $m/z = 211.7$  (M<sup>+</sup>). **<sup>1</sup>H NMR** (400 MHz, CD<sub>3</sub>OD, 298 K):  $\delta$  2.36 (s, 3H, H<sub>d</sub>), 4.18 (s, 2H, H<sub>e</sub>), 4.20 (s, 2H, H<sub>a</sub>), 7.27 (d,  $J = 8$  Hz, 2H, H<sub>c</sub>), 7.36 (d,  $J = 8$  Hz, 2H, H<sub>b</sub>), 7.45-7.46 (overlapped, 5H, H<sub>f-h</sub>); **<sup>13</sup>C NMR** (63 MHz, CD<sub>3</sub>OD, 298 K):  $\delta$  38.3, 49.9, 50.4, 115.3, 123.9, 130.0, 130.4, 130.9, 132.3, 132.6. Anal. Calcd for C<sub>15</sub>H<sub>18</sub>ClN: C, 72.71; H, 7.32. Found: C, 72.80; H, 7.23.

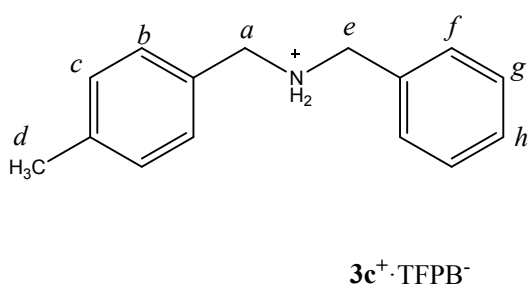

**Derivative 3c<sup>+</sup>·TFPB<sup>-</sup>:** (1.85 g, 1.72 mmol, 86%). **ESI(+)** MS:  $m/z = 211.7$  (M<sup>+</sup>). **<sup>1</sup>H NMR** (250 MHz, CD<sub>3</sub>OD, 298 K):  $\delta$  2.34 (s, 3H, H<sub>d</sub>), 4.16 (s, 2H, H<sub>e</sub>), 4.19 (s, 2H, H<sub>a</sub>), 7.28-7.36 (overlapped, 4H, H<sub>c,b</sub>), 7.36 (overlapped, 5H, H<sub>f-h</sub>), 7.59 (overlapped, 12H, Ar<sup>TFPB</sup>); **<sup>13</sup>C NMR** (63 MHz, CD<sub>3</sub>OD, 298 K):  $\delta$  21.2, 51.8, 51.9, 118.5, 119.3, 123.6, 127.9, 129.4, 129.7, 130.3, 130.7, 130.9, 132.2, 132.6, 135.8, 141.0, 161.6, 162.4, 163.2, 164.0. Anal. Calcd for C<sub>47</sub>H<sub>30</sub>BF<sub>24</sub>N: C, 52.49; H, 2.81. Found: C, 52.58; H, 2.73.



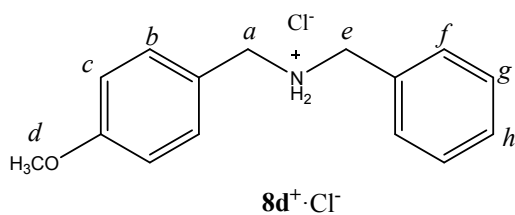

**Derivative 8d<sup>+</sup>·Cl<sup>-</sup>:** (1.10 g, 4.2 mmol, 84%). **ESI(+)** MS:  $m/z = 227.7$  (M<sup>+</sup>). **<sup>1</sup>H NMR** (400 MHz, CD<sub>3</sub>OD, 298 K):  $\delta$  3.80 (s, 3H, H<sub>d</sub>), 4.18 (s, 2H, H<sub>a</sub>), 4.21 (s, 2H, H<sub>e</sub>), 6.98 (broad, 2H, H<sub>b</sub>), 7.44-7.52 (overlapped, 7H, H<sub>c</sub>+H<sub>f-h</sub>); **<sup>13</sup>C NMR** (100 MHz, CD<sub>3</sub>OD, 298 K):  $\delta$  51.6, 51.7, 55.8, 115.5, 124.1, 130.3, 130.6, 131.1, 132.5, 132.7, 162.1. Anal. Calcd for C<sub>15</sub>H<sub>18</sub>ClNO: C, 68.30; H, 6.88. Found: C, 68.40; H, 6.97.

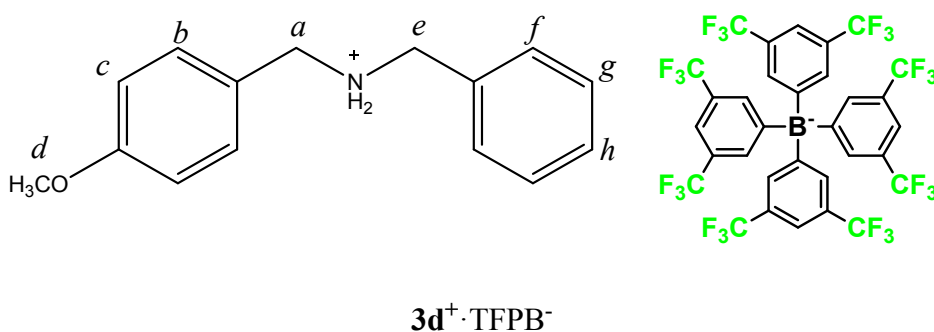

**Derivative 3d<sup>+</sup>·TFPB<sup>-</sup>:** (2.07 g, 1.90 mmol, 95%). **ESI(+)** MS:  $m/z = 227.7$  (M<sup>+</sup>). **<sup>1</sup>H NMR** (250MHz, CD<sub>3</sub>OD, 298 K):  $\delta$  3.66 (s, 3H, H<sub>d</sub>), 4.20 (s, 2H, H<sub>e</sub>), 4.22 (s, 2H, H<sub>a</sub>), 7.48-7.63 (overlapped, 21H, H<sub>c,b</sub> + H<sub>f-h</sub> + Ar<sup>TFPB</sup>); **<sup>13</sup>C NMR** (63 MHz, CD<sub>3</sub>OD, 298 K):  $\delta$  52.4, 52.5, 55.3, 119.0, 119.8, 124.1, 128.4, 130.0, 130.8, 131.2, 131.39, 131.43, 132.7, 133.1, 136.3, 141.5, 162.1, 162.9, 163.7, 164.5. Anal. Calcd for C<sub>47</sub>H<sub>30</sub>BF<sub>24</sub>NO: C, 51.72; H, 2.77. Found: C, 51.81; H, 2.68.

## Synthesis of $4b-e^+ \cdot TFPB^-$ salts

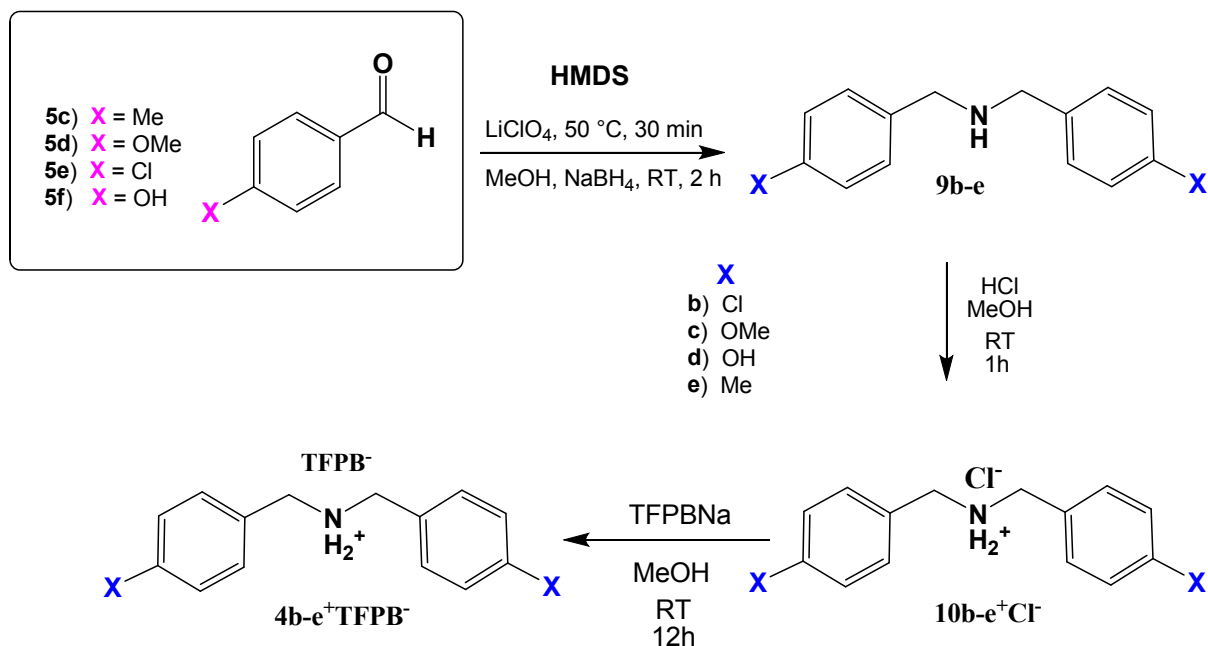

A mixture of appropriate aldehyde **5c-f** (2 mmol), hexamethyldisilazane (HMDS, 4 mmol), and LiClO<sub>4</sub> (2 mmol) was heated for 30 min at 50 °C. The reaction mixture was cooled at 0 °C and a solution of NaBH<sub>4</sub> (10 mmol) in methanol (5 mL) was slowly added over a period of 15 min. The reaction mixture was allowed to warm at room temperature and then stirred for 2 h. Methanol was removed under reduced pressure, the residue was quenched with a saturated aqueous solution of NaHCO<sub>3</sub> (50 mL) and extracted with AcOEt (50 mL). The combined organic extract was washed with saturated aqueous NaCl, dried over anhydrous Na<sub>2</sub>SO<sub>4</sub>, filtered, and concentrated. The crude product was dissolved in MeOH at room temperature and an aqueous solution of HCl (37% w/w, 3 mmol) was added dropwise. The mixture was kept under stirring for 15 min until a white precipitate was formed. The solid was collected by filtration, washed with MeOH (20 mL) and CH<sub>3</sub>CN (20 mL), and dried under vacuum, to give solid salts **10b-e<sup>+</sup>Cl<sup>-</sup>**. Each salt **10b-e<sup>+</sup>Cl<sup>-</sup>** (1.0 mmol) was dissolved in warm dry MeOH (50 mL), then a solution of sodium tetrakis[3,5-bis(trifluoromethyl)phenyl]borate (1.0 mmol) in dry MeOH (25 mL) was added. The mixture was kept under stirring overnight in the dark. The solvent was removed and deionized water was added, obtaining a brown precipitate that was filtered off and dried under vacuum to give salts **4b-e<sup>+</sup>TFPB<sup>-</sup>**.

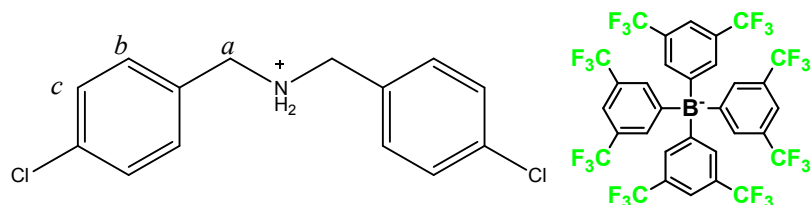

**4b<sup>+</sup>·TFPB<sup>-</sup>**

**Derivative 4b<sup>+</sup>·TFPB<sup>-</sup>:** (1.05 g, 0.93 mmol, 93%). **ESI(+)** MS:  $m/z = 265.6$  ( $M^+$ ). **<sup>1</sup>H NMR** (400 MHz, CD<sub>3</sub>OD, 298 K):  $\delta$  4.23 (s, 4H, H<sub>a</sub>), 7.48 (s, 12H, ArH<sup>TFPB</sup>), 7.60-7.63 (overlapped, 8H, H<sub>b+c</sub>); **<sup>13</sup>C NMR** (100 MHz, CD<sub>3</sub>OD, 298 K):  $\delta$  53.0, 120.0, 123.2, 126.0, 128.6, 131.3, 131.5, 131.8, 132.0, 132.1, 132.1, 132.5, 132.8, 133.9, 134.2, 137.3, 138.4, 163.7, 164.2, 164.7, 165.2. Anal. Calcd for C<sub>46</sub>H<sub>26</sub>BCl<sub>2</sub>F<sub>24</sub>N: C, 48.88; H, 2.32. Found: C, 48.99; H, 2.23.

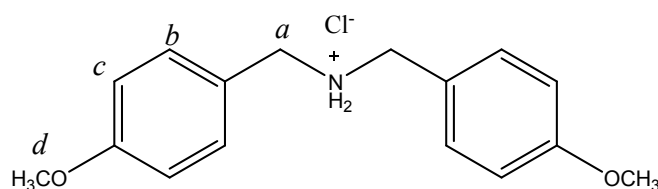

**10c<sup>+</sup>·Cl<sup>-</sup>**

**Derivative 10c<sup>+</sup>·Cl<sup>-</sup>:** (0.37 g, 1.28 mmol, 64%) **ESI(+)** MS:  $m/z = 257.7$  ( $M^+$ ). **<sup>1</sup>H NMR** (600 MHz, CD<sub>3</sub>OD, 298 K): 3.83 (s, 6H, H<sub>d</sub>), 4.17 (s, 4H, H<sub>a</sub>), 7.02 (d,  $J = 7.8$ Hz, 4H, H<sub>c</sub>), 7.43 (d,  $J = 7.8$ Hz, 4H, H<sub>b</sub>); **<sup>13</sup>C NMR** (150 MHz, CD<sub>3</sub>OD, 298 K):  $\delta$  51.3, 55.8, 115.5, 124.2, 132.6, 162.1. Anal. Calcd for C<sub>16</sub>H<sub>20</sub>ClNO<sub>2</sub>: C, 65.41; H, 6.86. Found: C, 65.50; H, 6.78.

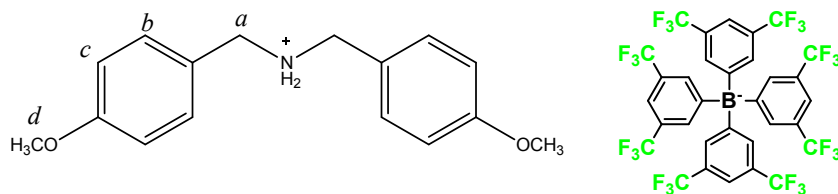

$4c^+ \cdot TFPB^-$

**Derivative  $4c^+ \cdot TFPB^-$ :** (1.02 g, 0.91 mmol, 91%). **ESI(+)** MS:  $m/z = 257.7$  ( $M^+$ ).  **$^1H$  NMR** (600 MHz,  $CD_3OD$ , 298 K): 3.82 (s, 6H,  $H_d$ ), 4.15 (s, 4H,  $H_a$ ), 7.02 (d,  $J = 9\text{Hz}$ , 4H,  $H_c$ ), 7.39 (d,  $J = 9\text{Hz}$ , 4H,  $H_b$ ), 7.61-7.63 (overlapped, 12H,  $ArH^{TFPB}$ );  **$^{13}C$  NMR** (150 MHz,  $CD_3OD$ , 298 K):  $\delta$  55.5, 62.0, 116.5, 117.9, 119.8, 122.0, 123.4, 126.9, 129.4, 130.0, 130.5, 131.8, 135.2, 155.5, 161.4, 162.0, 162.8, 163.4. Anal. Calcd for  $C_{48}H_{32}BF_{24}NO_2$ : C, 51.40; H, 2.88. Found: C, 51.48; H, 2.79.

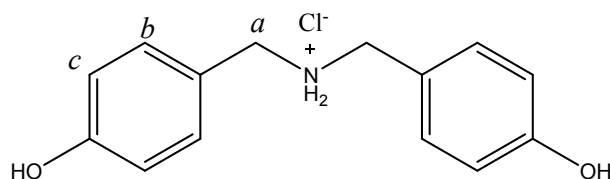

$10d^+ \cdot Cl^-$

**Derivative  $10d^+ \cdot Cl^-$ :** (0.32 g, 1.20 mmol, 60%). **ESI(+)** MS:  $m/z = 229.6$  ( $M^+$ ).  **$^1H$  NMR** (400 MHz,  $CD_3OD$ , 298 K): 4.11(s, 4H,  $H_a$ ), 6.87 (d,  $J = 8.8\text{Hz}$ , 4H,  $H_c$ ), 7.32 (d,  $J = 8.8\text{Hz}$ , 4H,  $H_b$ );  **$^{13}C$  NMR** (100 MHz,  $CD_3OD$ , 298 K):  $\delta$  51.3, 116.9, 122.9, 132.6, 159.9. Anal. Calcd for  $C_{14}H_{16}ClNO_2$ : C, 63.28; H, 6.07. Found: C, 63.35; H, 6.15.

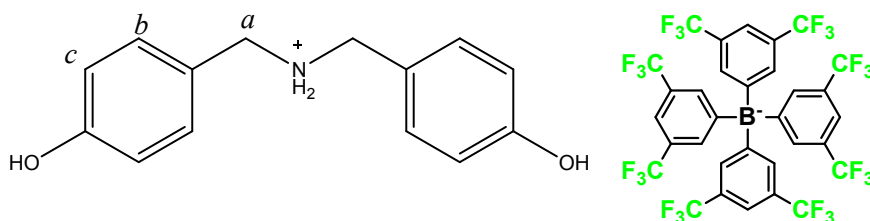

**4d<sup>+</sup>·TFPB<sup>-</sup>**

**Derivative 4d<sup>+</sup>·TFPB<sup>-</sup>:** (0.96 g, 0.88 mmol, 88%). **ESI(+)** MS:  $m/z = 229.6$  (M<sup>+</sup>). **<sup>1</sup>H NMR** (300 MHz, CD<sub>3</sub>OD, 298 K): 4.10 (s, 4H, H<sub>a</sub>), 6.87 (d,  $J = 8.4$  Hz, 4H, H<sub>c</sub>), 7.30 (d,  $J = 8.4$  Hz, 4H, H<sub>b</sub>), 7.62 (overlapped, 12H, ArH<sup>TFPB</sup>); **<sup>13</sup>C NMR** (75 MHz, CD<sub>3</sub>OD, 298 K):  $\delta$  51.4, 117.0, 118.4, 118.49, 118.54, 120.4, 122.8, 124.0, 127.6, 129.9, 130.24, 130.28, 130.66, 130.69, 130.73, 131.2, 132.6, 135.8, 160.0, 161.9, 162.6, 162.9, 163.2, 163.9. Anal. Calcd for C<sub>16</sub>H<sub>18</sub>BF<sub>24</sub>NO<sub>2</sub>: C, 50.53; H, 2.58. Found: C, 50.62; H, 2.49.

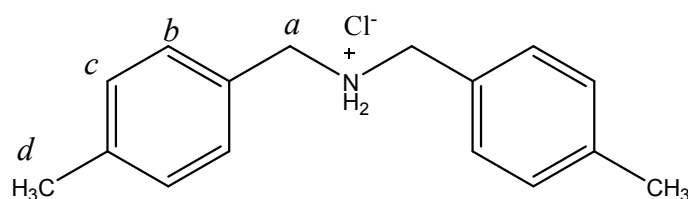

**10e<sup>+</sup>·Cl<sup>-</sup>**

**Derivative 10e<sup>+</sup>·Cl<sup>-</sup>:** (0.46 g, 1.76 mmol, 88%). **ESI(+)** MS:  $m/z = 225.7$  (M<sup>+</sup>). **<sup>1</sup>H NMR** (250 MHz, CD<sub>3</sub>OD, 298 K): 2.37 (s, 6H, H<sub>d</sub>), 4.17 (s, 4H, H<sub>a</sub>), 7.29 (d,  $J = 7.7$  Hz, 4H, H<sub>b</sub>), 7.35 (d,  $J = 7.7$  Hz, 4H, H<sub>c</sub>); **<sup>13</sup>C NMR** (63 MHz, CDCl<sub>3</sub>, 298 K):  $\delta$  19.8, 50.2, 127.9, 129.4, 129.6, 139.5. Anal. Calcd for C<sub>16</sub>H<sub>20</sub>ClN: C, 73.41; H, 7.70. Found: C, 73.50; H, 7.78.

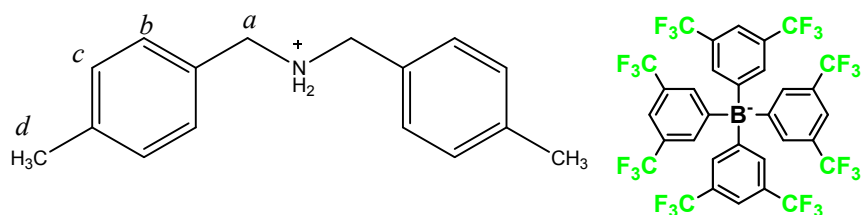

**4e<sup>+</sup>·TFPB<sup>-</sup>**

**Derivative 4e<sup>+</sup>·TFPB<sup>-</sup>:** (1.00 g, 0.92 mmol, 92%). **ESI(+)** MS:  $m/z = 225.7$  (M<sup>+</sup>). **<sup>1</sup>H NMR** (250 MHz, CD<sub>3</sub>OD, 298 K): 2.36 (s, 6H, H<sub>d</sub>), 4.14 (s, 4H, H<sub>a</sub>), 7.29 (d,  $J = 8.2$ , 4H, H<sub>b</sub>), 7.32 (d,  $J = 8.2$ Hz, 4H, H<sub>c</sub>), 7.59 (overlapped, 12H, ArH<sup>TFPB</sup>); **<sup>13</sup>C NMR** (75 MHz, CD<sub>3</sub>OD, 298 K):  $\delta$  22.6, 53.5, 119.81, 119.86, 119.92, 121.8, 125.4, 128.9, 129.8, 131.2, 131.6, 131.65, 131.69, 132.0, 132.03, 132.07, 132.1, 132.5, 133.3, 134.3, 137.2, 141.5, 163.3, 163.9, 164.6, 165.3. Anal. Calcd for C<sub>48</sub>H<sub>32</sub>BF<sub>24</sub>N: C, 52.91; H, 2.96. Found: C, 53.00; H, 2.88.

# $^1\text{H}$ and $^{13}\text{C}$ NMR spectra of $8\text{a-d}^+\cdot\text{Cl}^-$ salts

## Derivative $8\text{a}^+\cdot\text{Cl}^-$

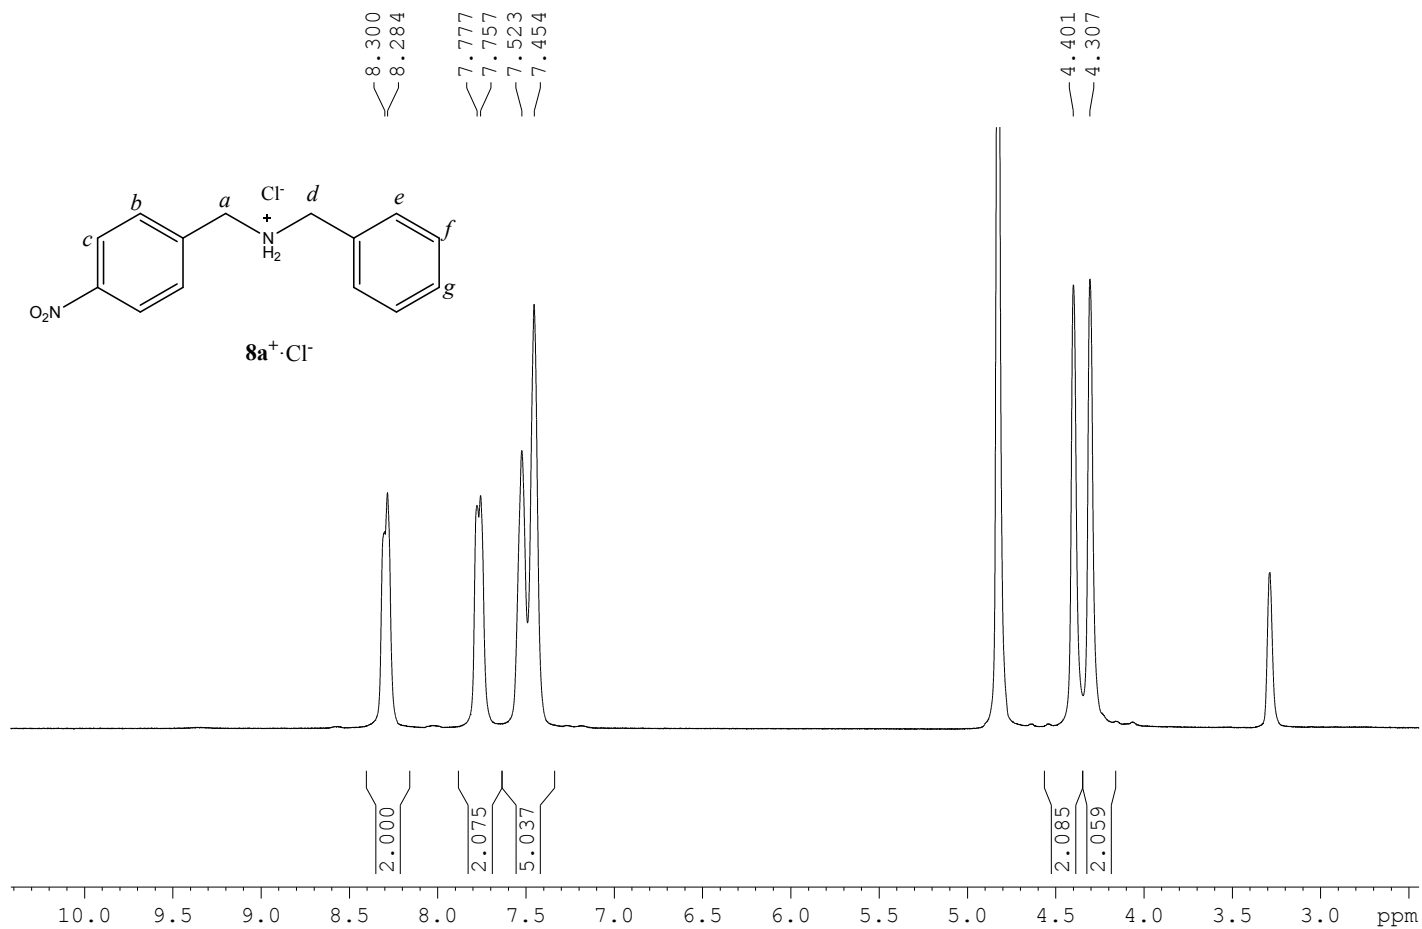

**Figure S1.**  $^1\text{H}$  NMR spectrum of derivate  $8\text{a}^+\cdot\text{Cl}^-$  (300 MHz,  $\text{CD}_3\text{OD}$ , 298 K).

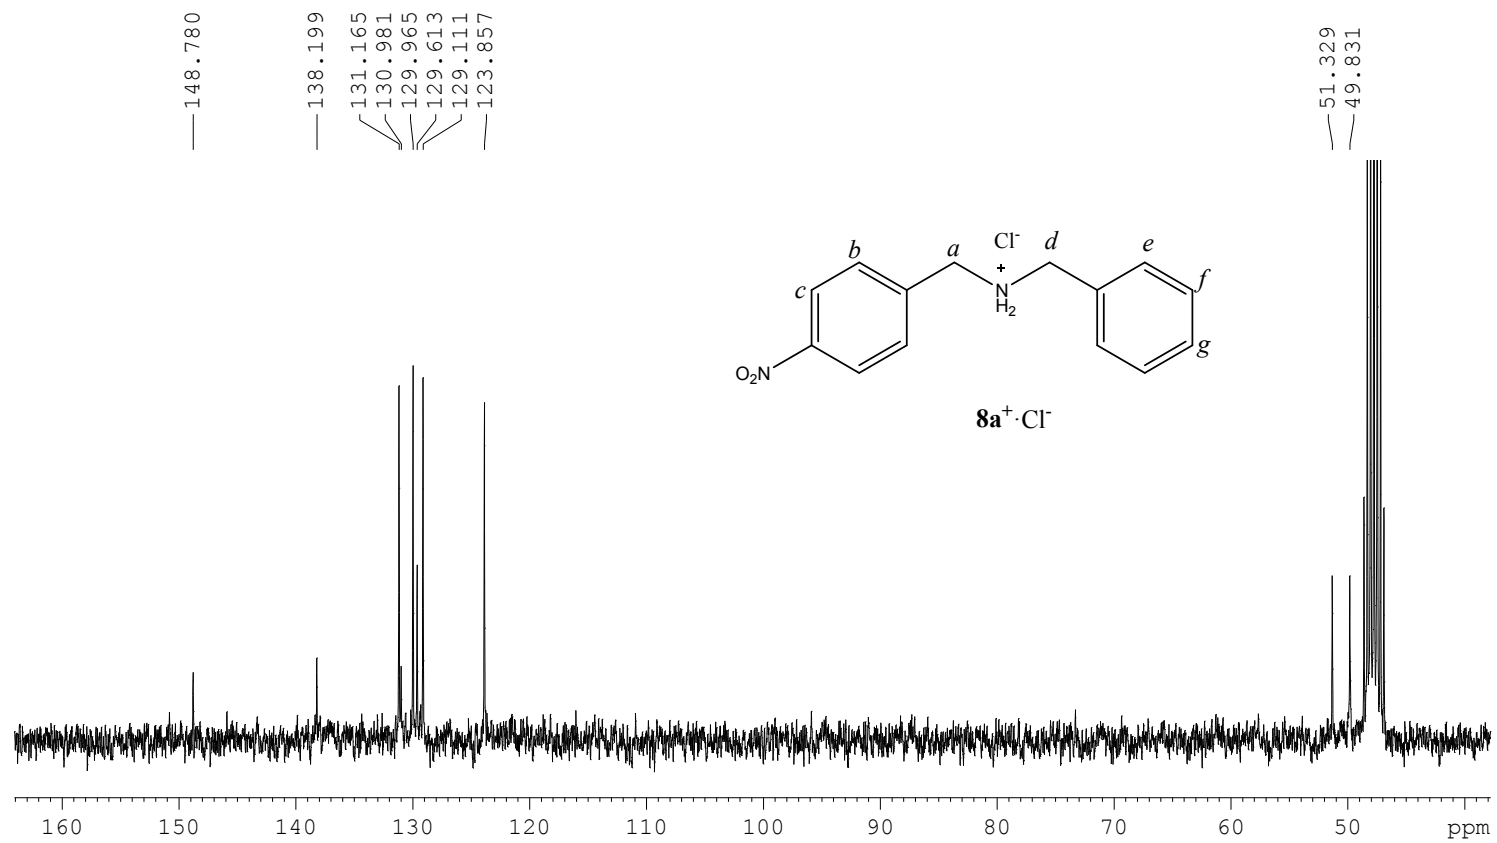

**Figure S2.**  $^{13}\text{C}$  NMR spectrum of derivative  $8\mathbf{a}^+\cdot\text{Cl}^-$  (75 MHz,  $\text{CD}_3\text{OD}$ , 298 K).



# Derivative $8b^+ \cdot Cl^-$

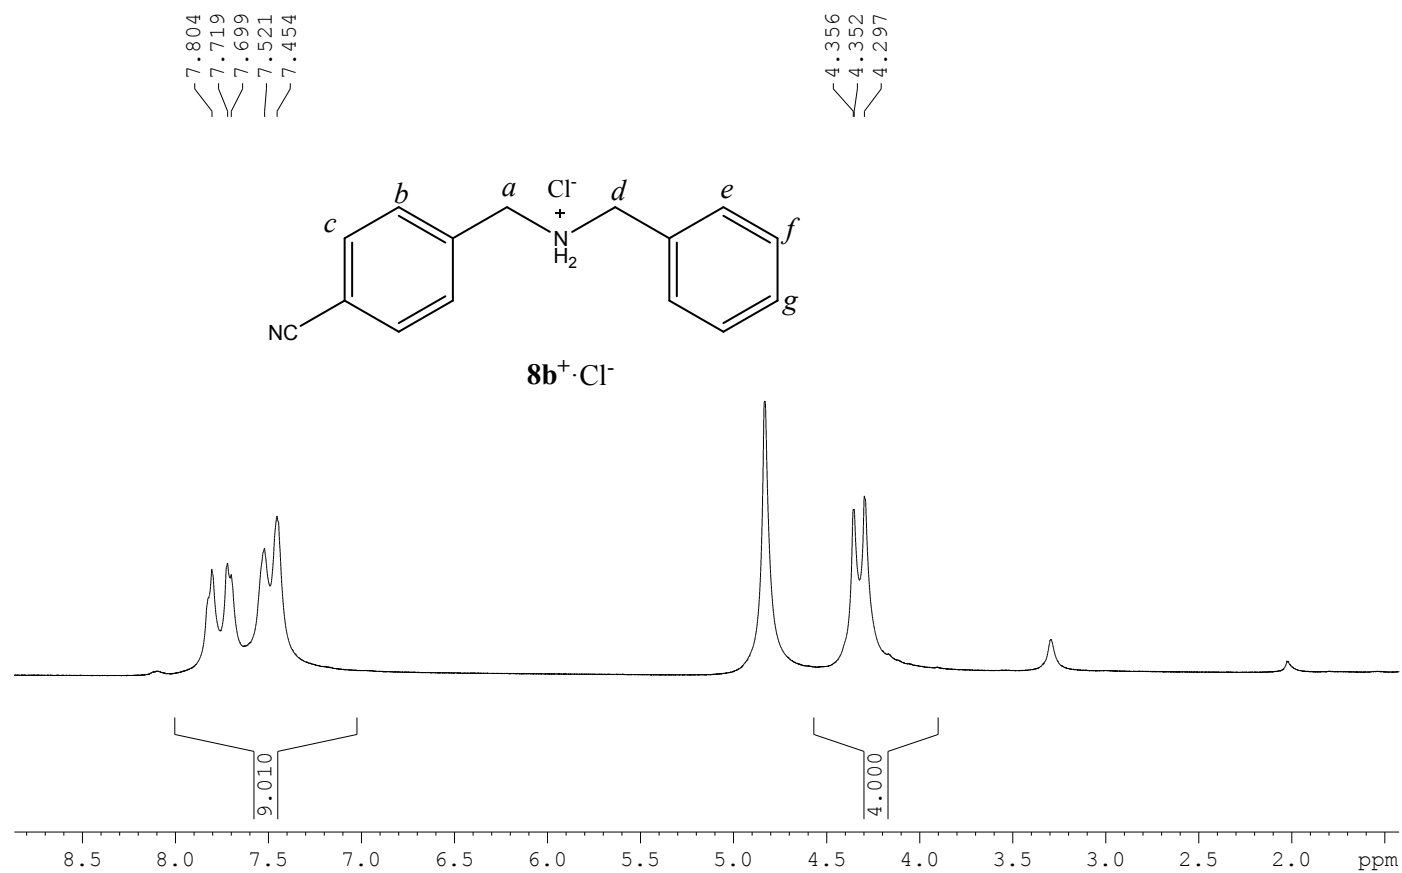

Figure S3.  $^1H$  NMR spectrum of derivative  $8b^+ \cdot Cl^-$  (300 MHz,  $CD_3OD$ , 298 K).

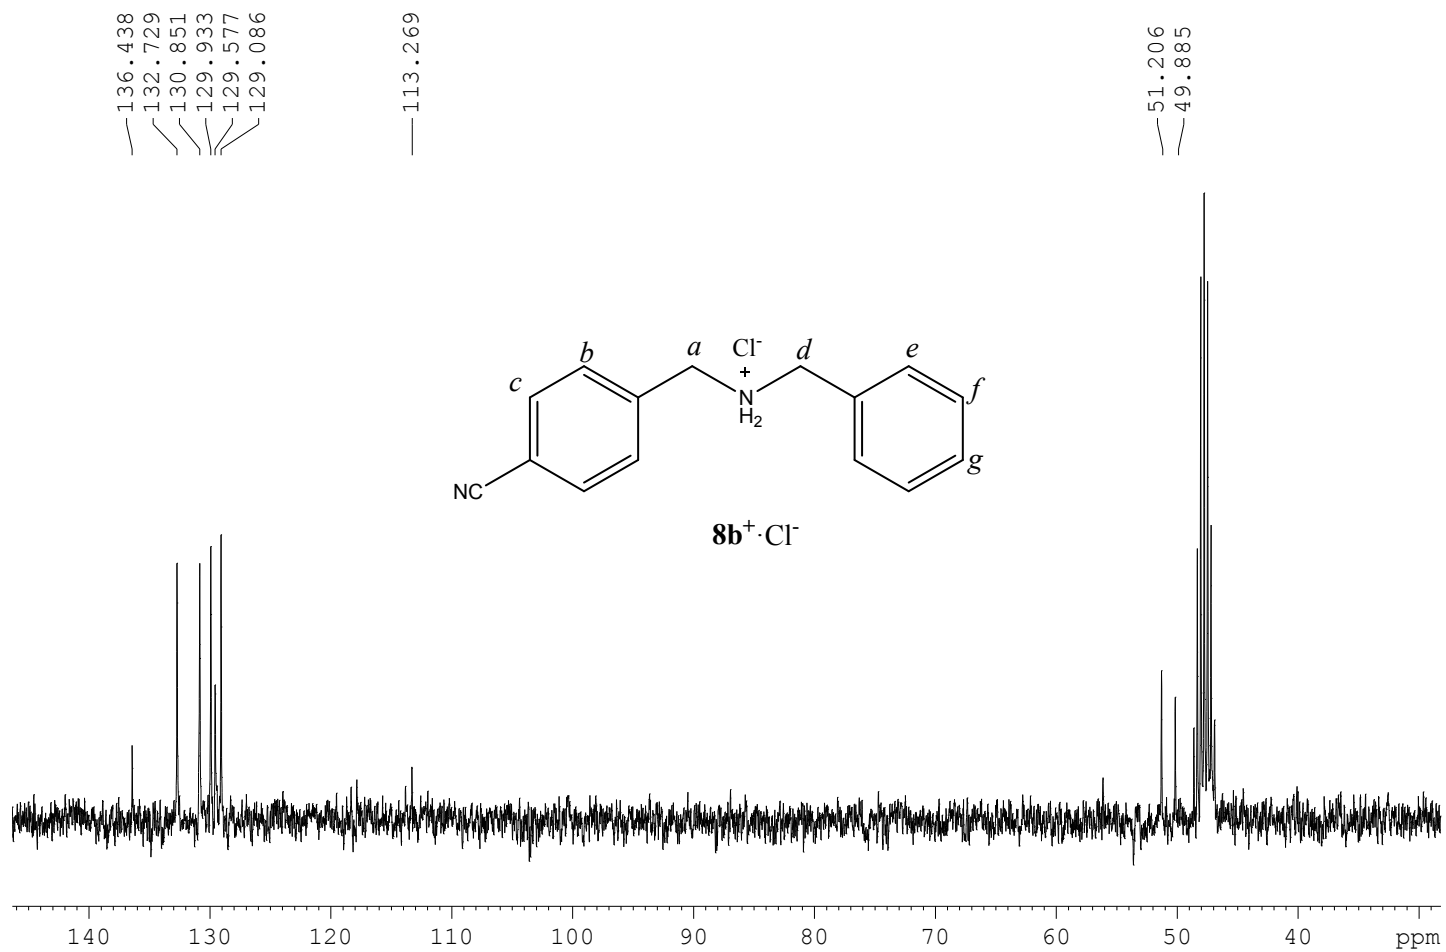

**Figure S4.**  $^{13}\text{C}$  NMR spectrum of derivative  $8\text{b}^+\cdot\text{Cl}^-$  (75 MHz,  $\text{CD}_3\text{OD}$ , 298 K).

# Derivative $8c^+ \cdot Cl^-$

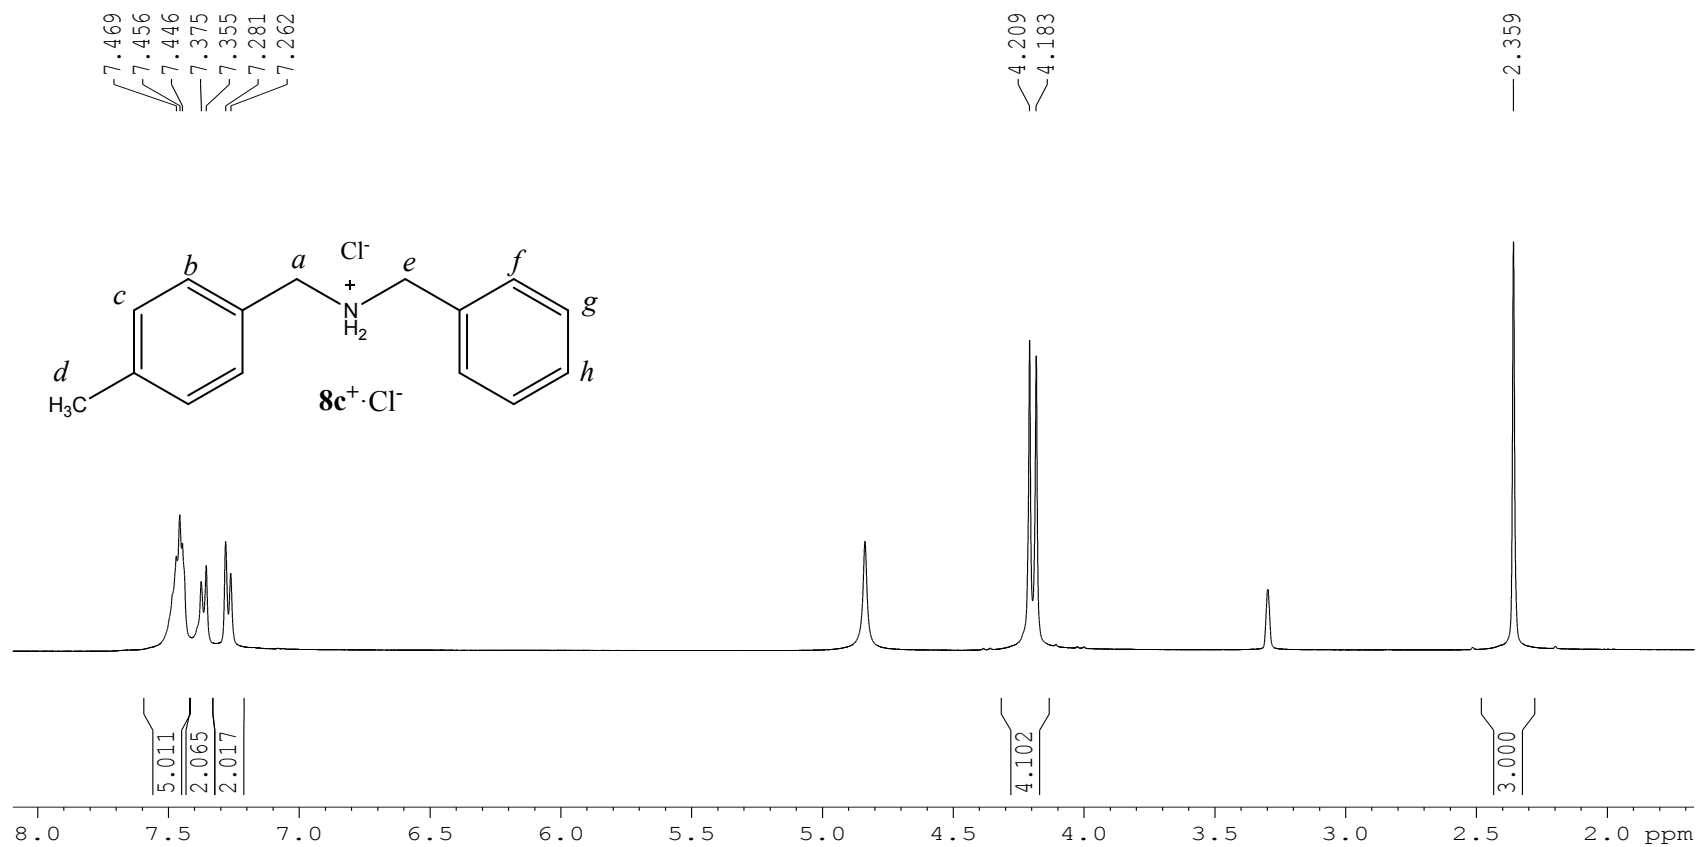

Figure S5.  $^1H$  NMR spectrum of derivative  $8c^+ \cdot Cl^-$  (400 MHz,  $CD_3OD$ , 298 K).

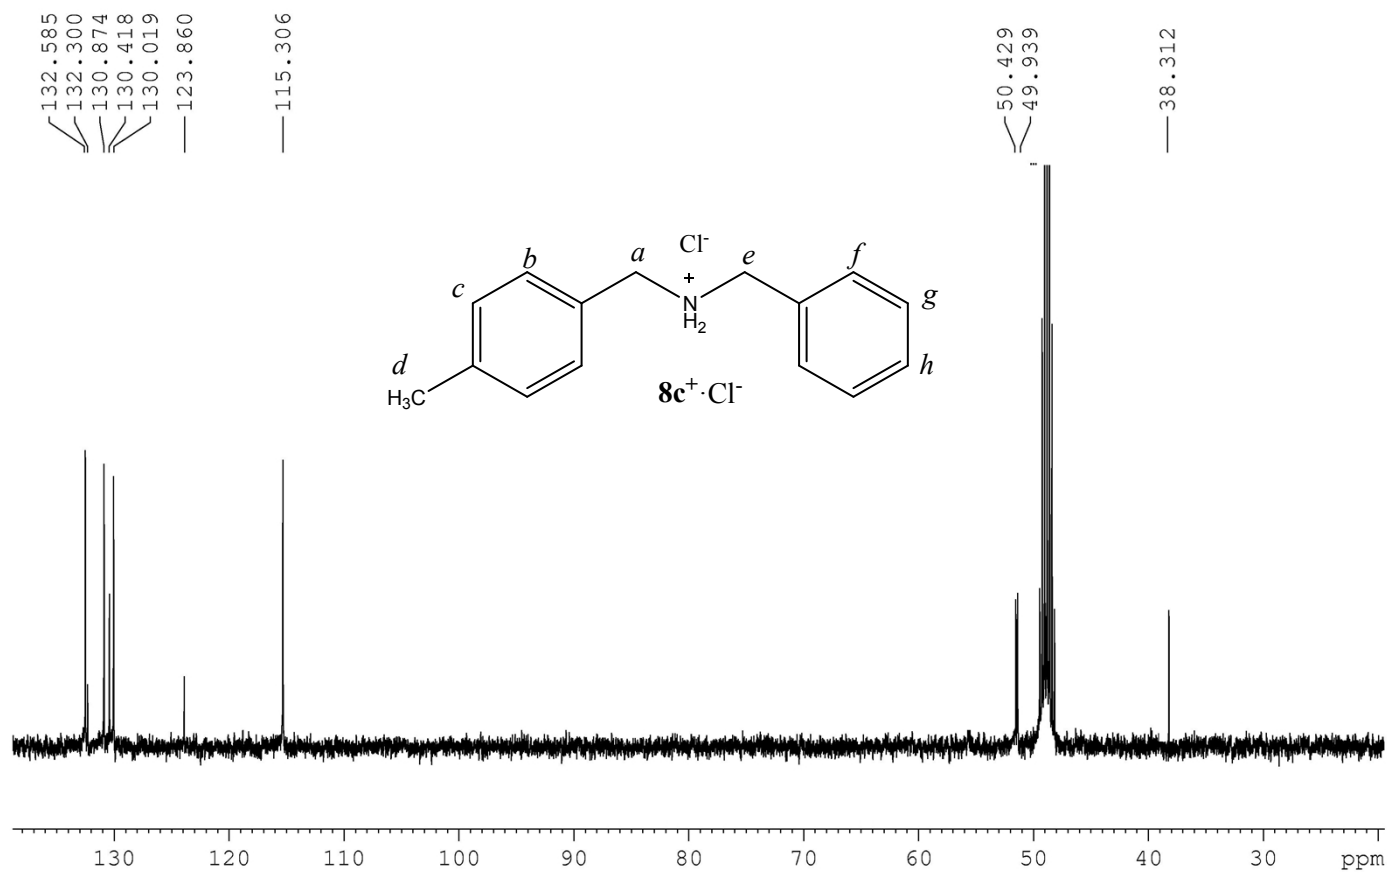

**Figure S6.** <sup>13</sup>C NMR spectrum of derivative **8c<sup>+</sup>·Cl<sup>-</sup>** (100 MHz, CDCl<sub>3</sub>, 298 K).

# Derivative $8d^+ \cdot Cl^-$

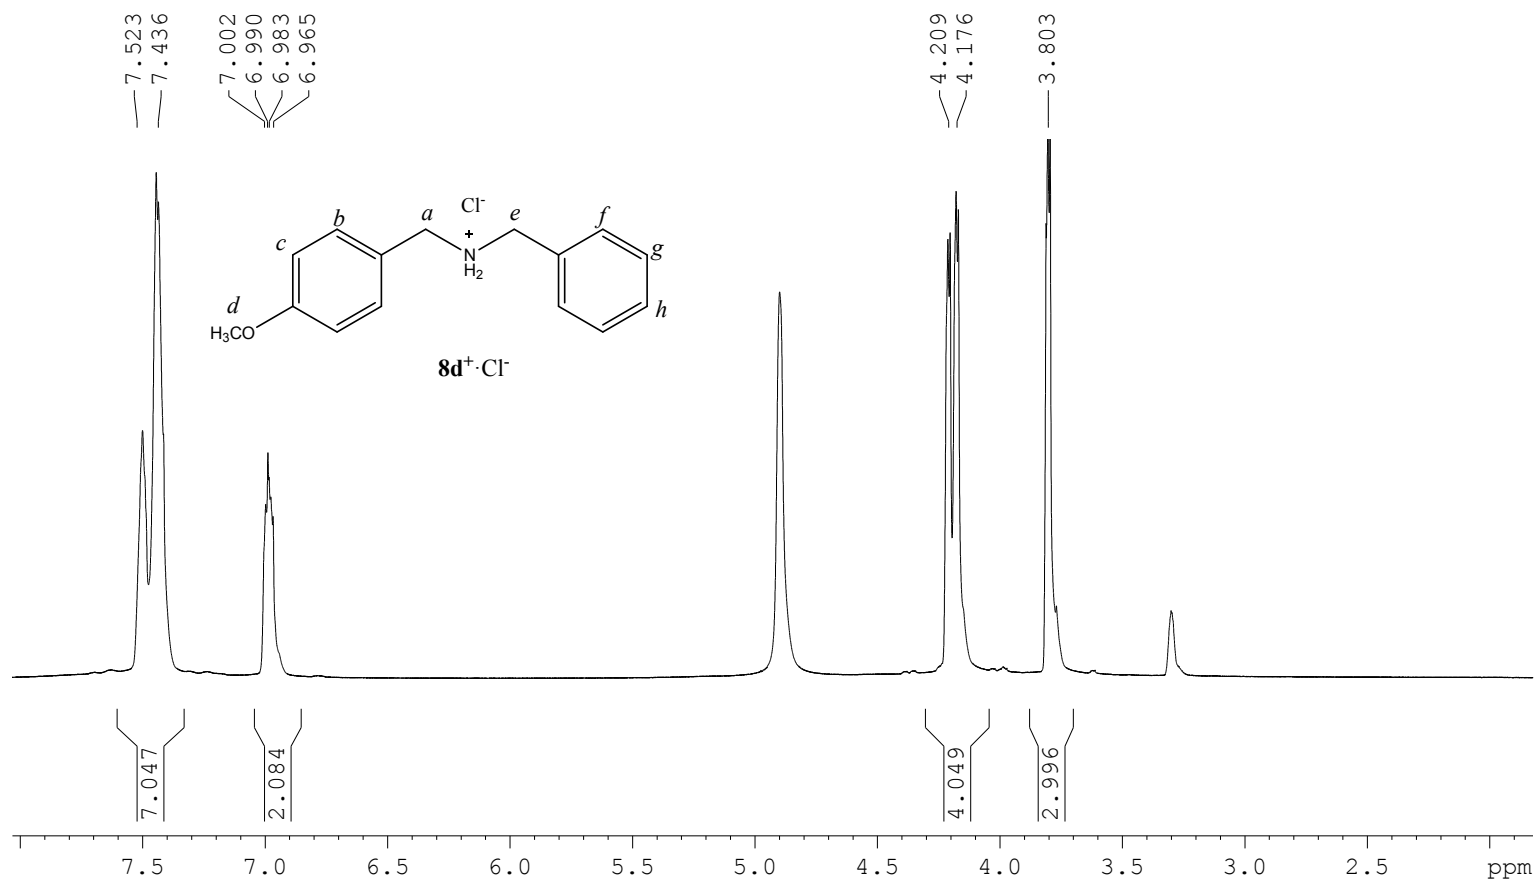

Figure S7.  $^1H$  NMR spectrum of derivative  $8d^+ \cdot Cl^-$  (400 MHz,  $CD_3OD$ , 298 K).

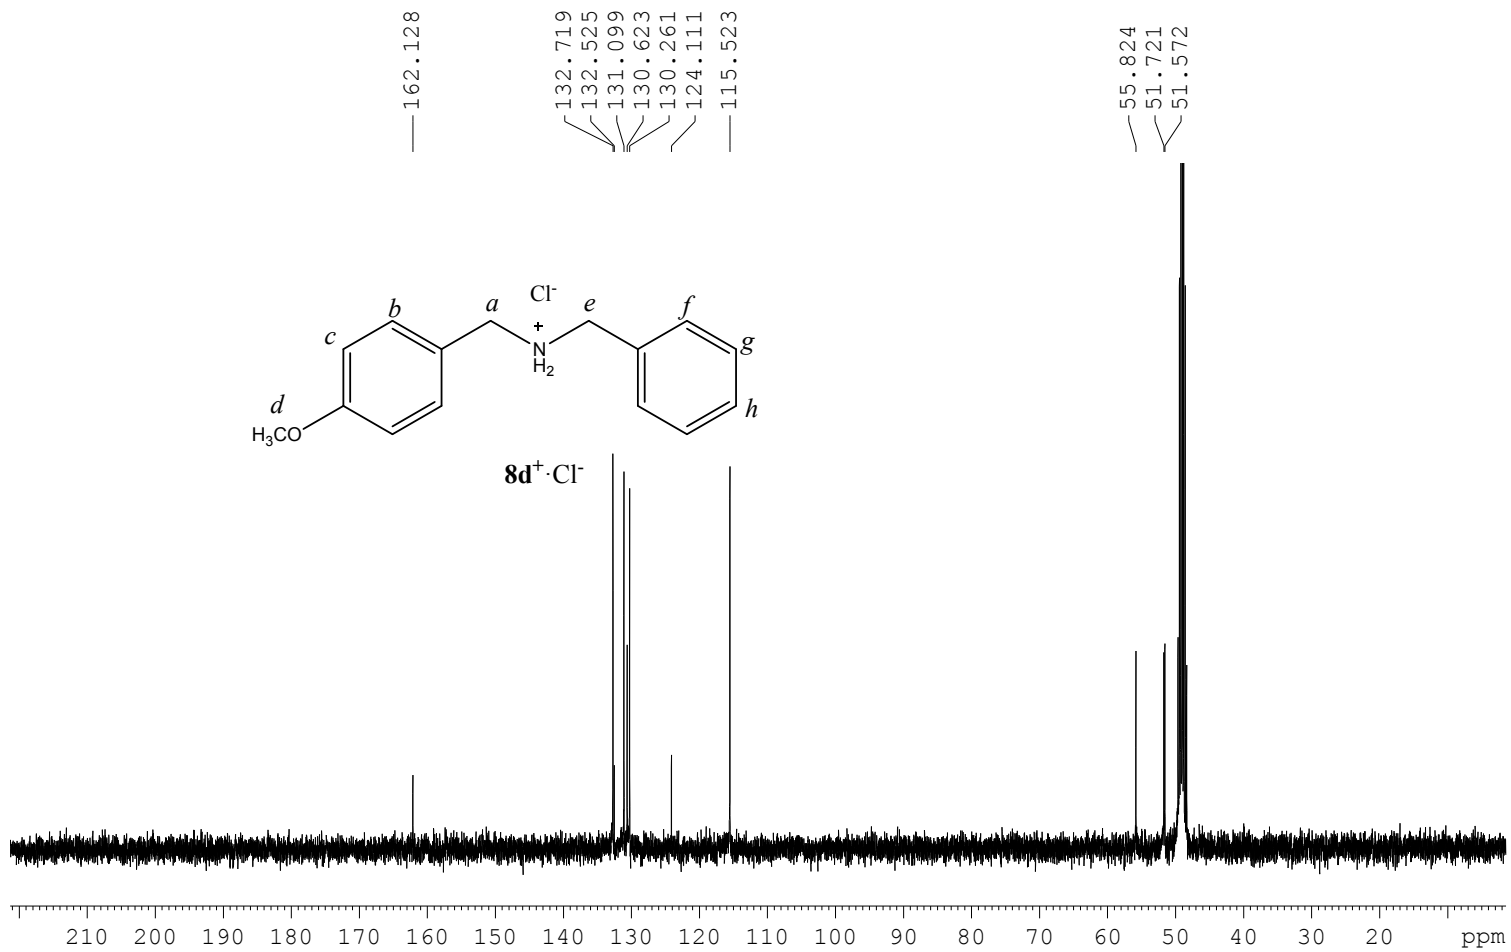

**Figure S8.** <sup>13</sup>C NMR spectrum of derivative **8d<sup>+</sup>·Cl<sup>-</sup>** (100 MHz, CD<sub>3</sub>OD, 298 K).

# $^1\text{H}$ and $^{13}\text{C}$ NMR spectra of $3\text{a-d}^+\cdot\text{TFPB}^-$ salts

## Derivative $3\text{a}^+\cdot\text{TFPB}^-$

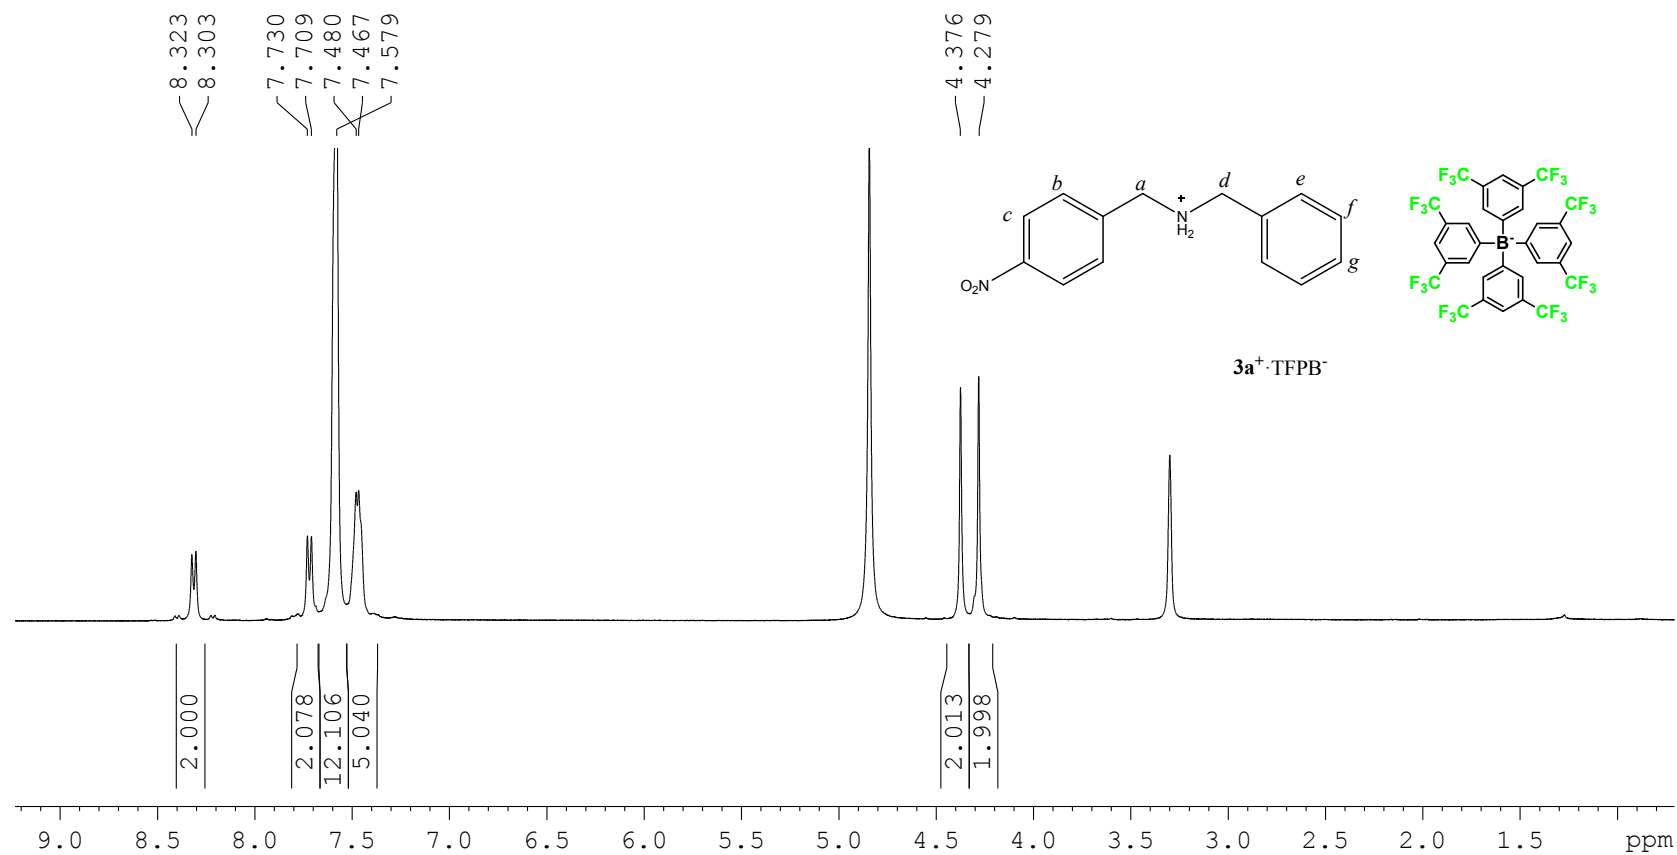

Figure S9.  $^1\text{H}$  NMR spectrum of derivate  $3\text{a}^+\cdot\text{TFPB}^-$  (400 MHz,  $\text{CD}_3\text{OD}$ , 298 K).

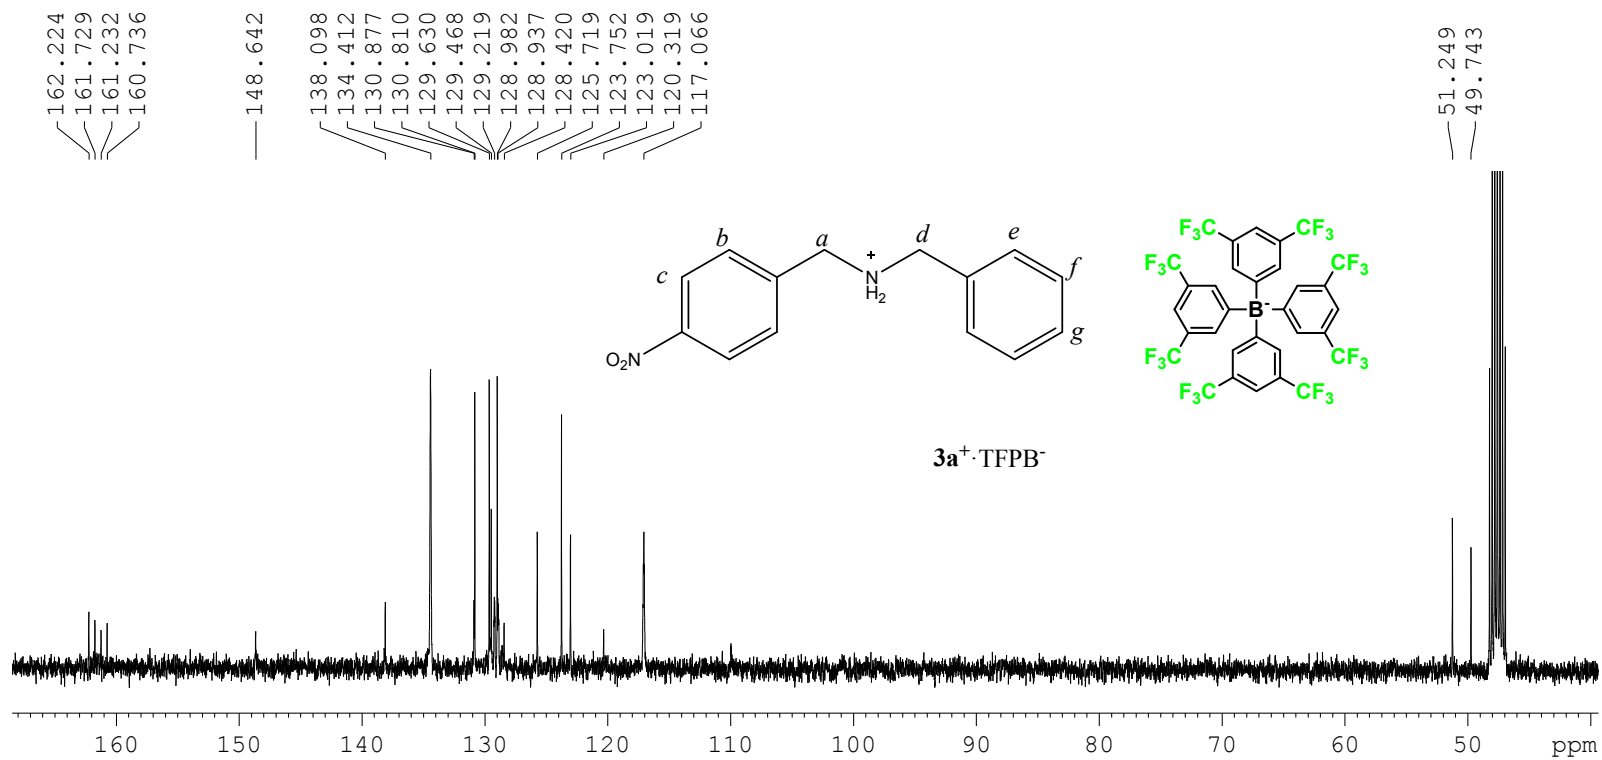

**Figure S10.** <sup>13</sup>C NMR spectrum of derivative **3a<sup>+</sup>·TFPB<sup>-</sup>** (100 MHz, CD<sub>3</sub>OD, 298 K).



# Derivative $3b^+ \cdot TFPB^-$

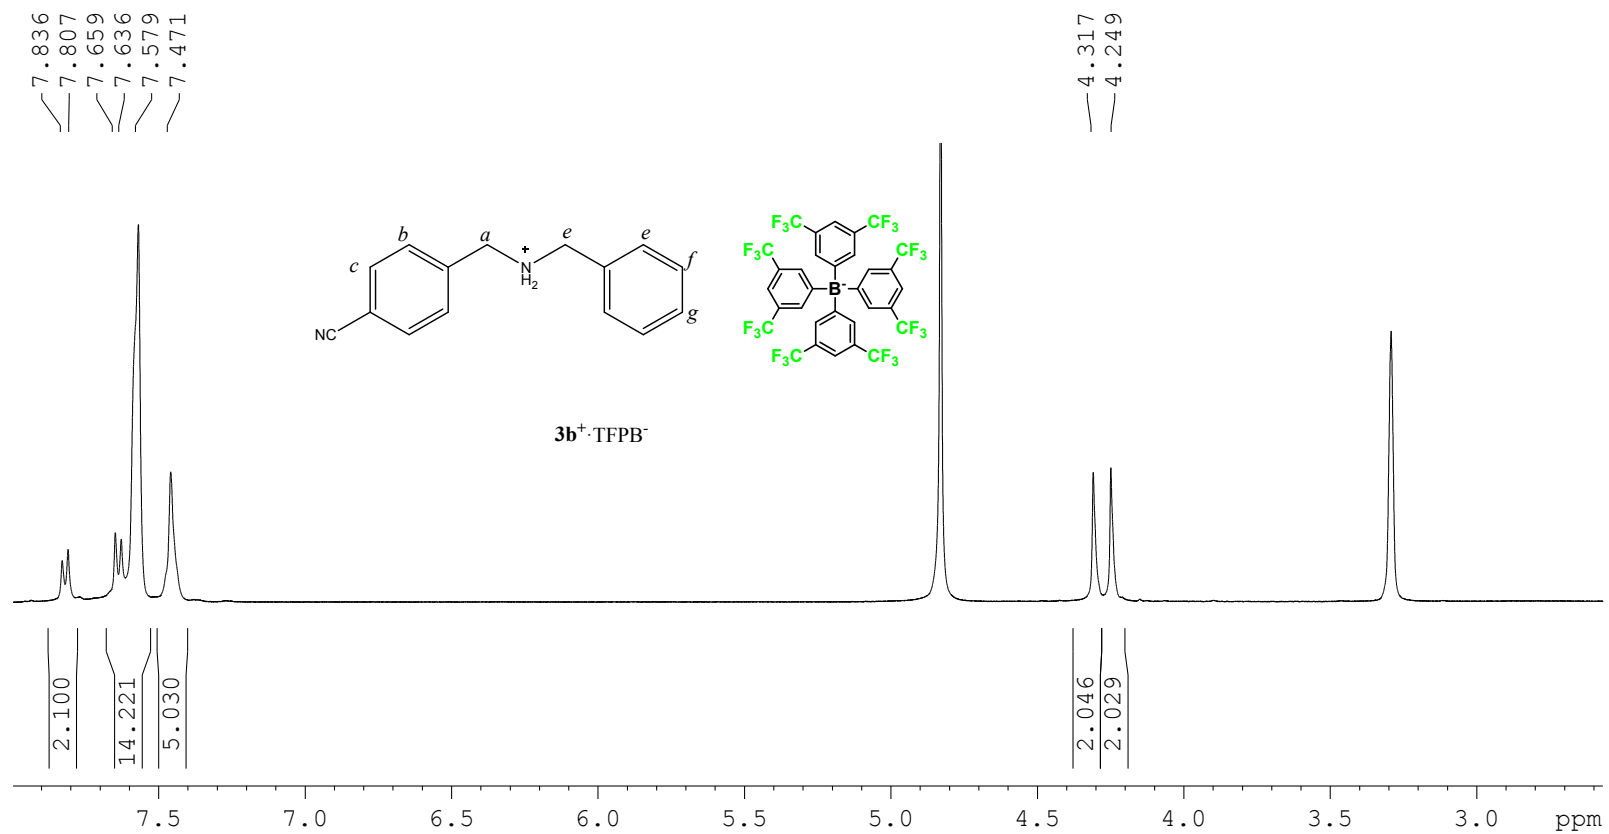

Figure S11.  $^1\text{H}$  NMR spectrum of derivate  $3b^+ \cdot TFPB^-$  (400 MHz,  $\text{CD}_3\text{OD}$ , 298 K).

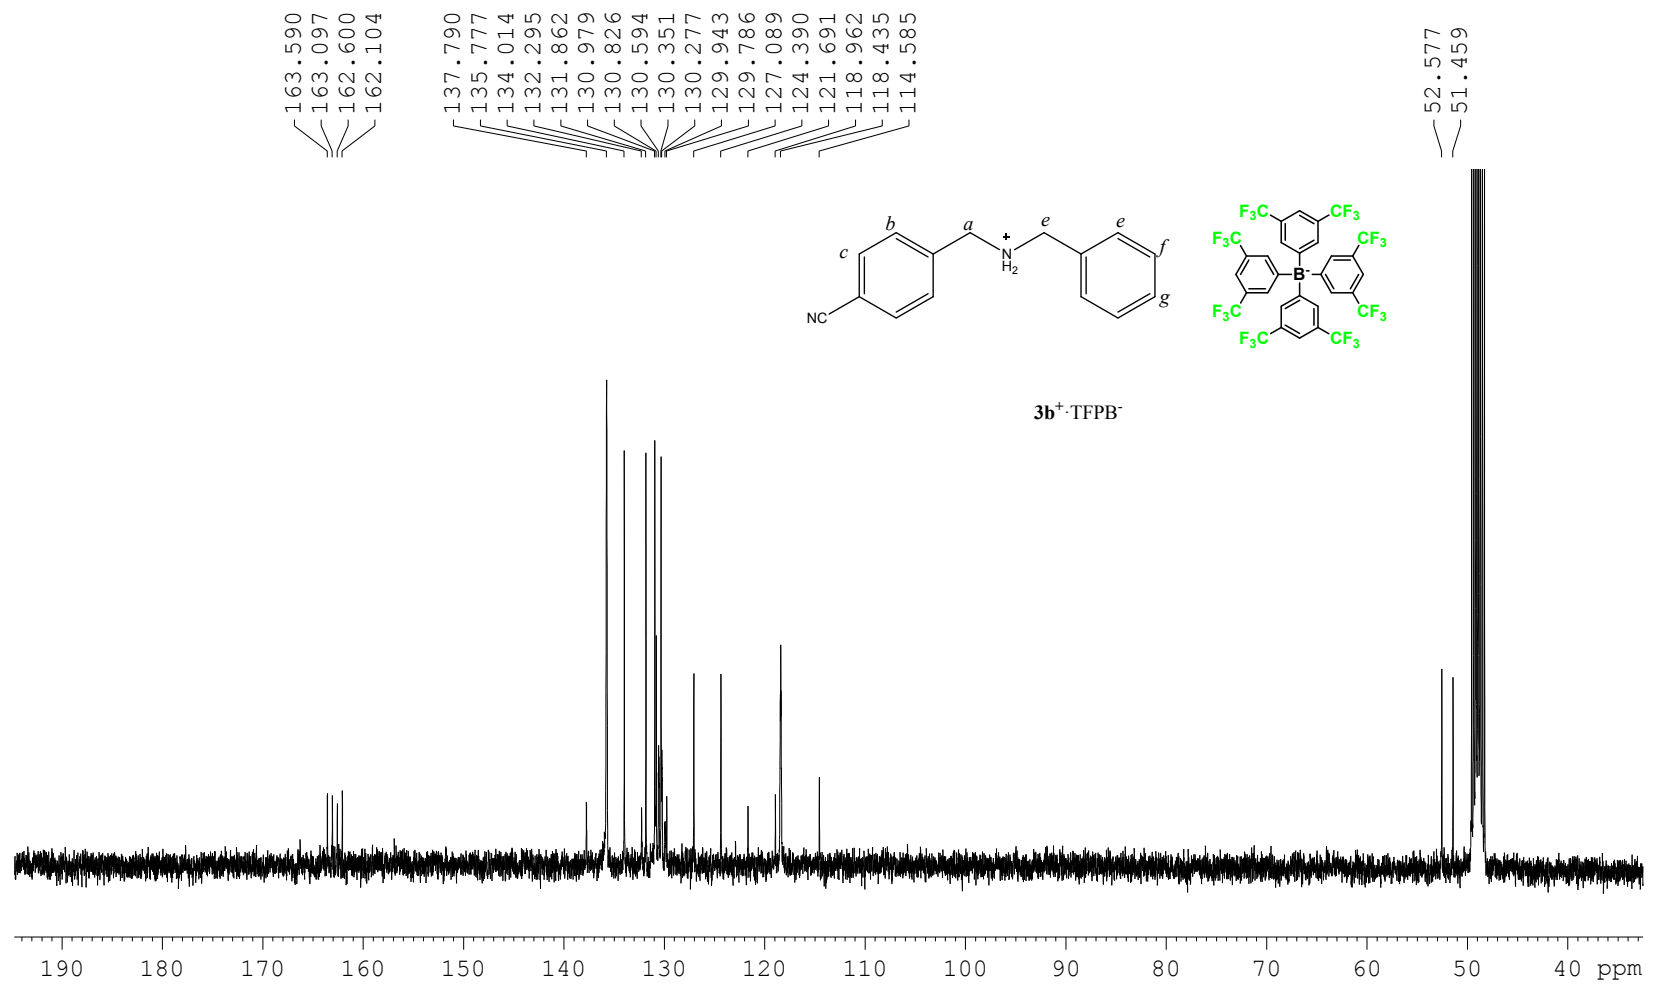

**Figure S12.**  $^{13}\text{C}$  NMR spectrum of derivative  $3\text{b}^+\cdot\text{TFPB}^-$  (100 MHz,  $\text{CD}_3\text{OD}$ , 298 K).

# Derivative $3c^+ \cdot TFPB^-$

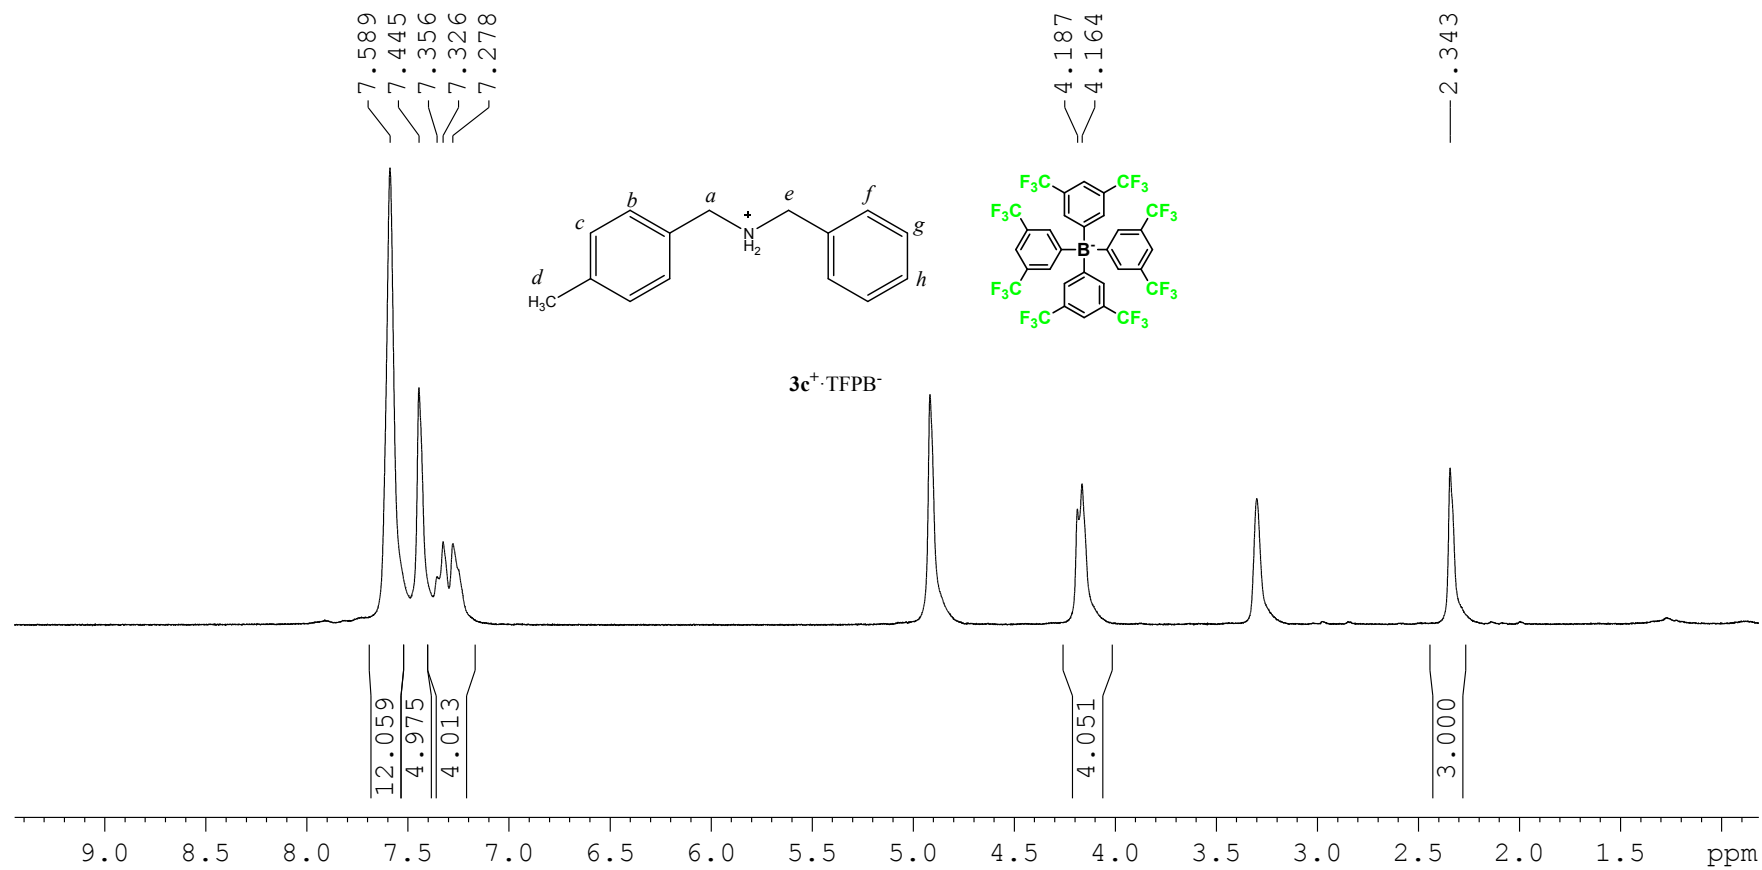

**Figure S13.**  $^1\text{H}$  NMR spectrum of derivate  $3c^+ \cdot TFPB^-$  (250 MHz,  $\text{CD}_3\text{OD}$ , 298 K).

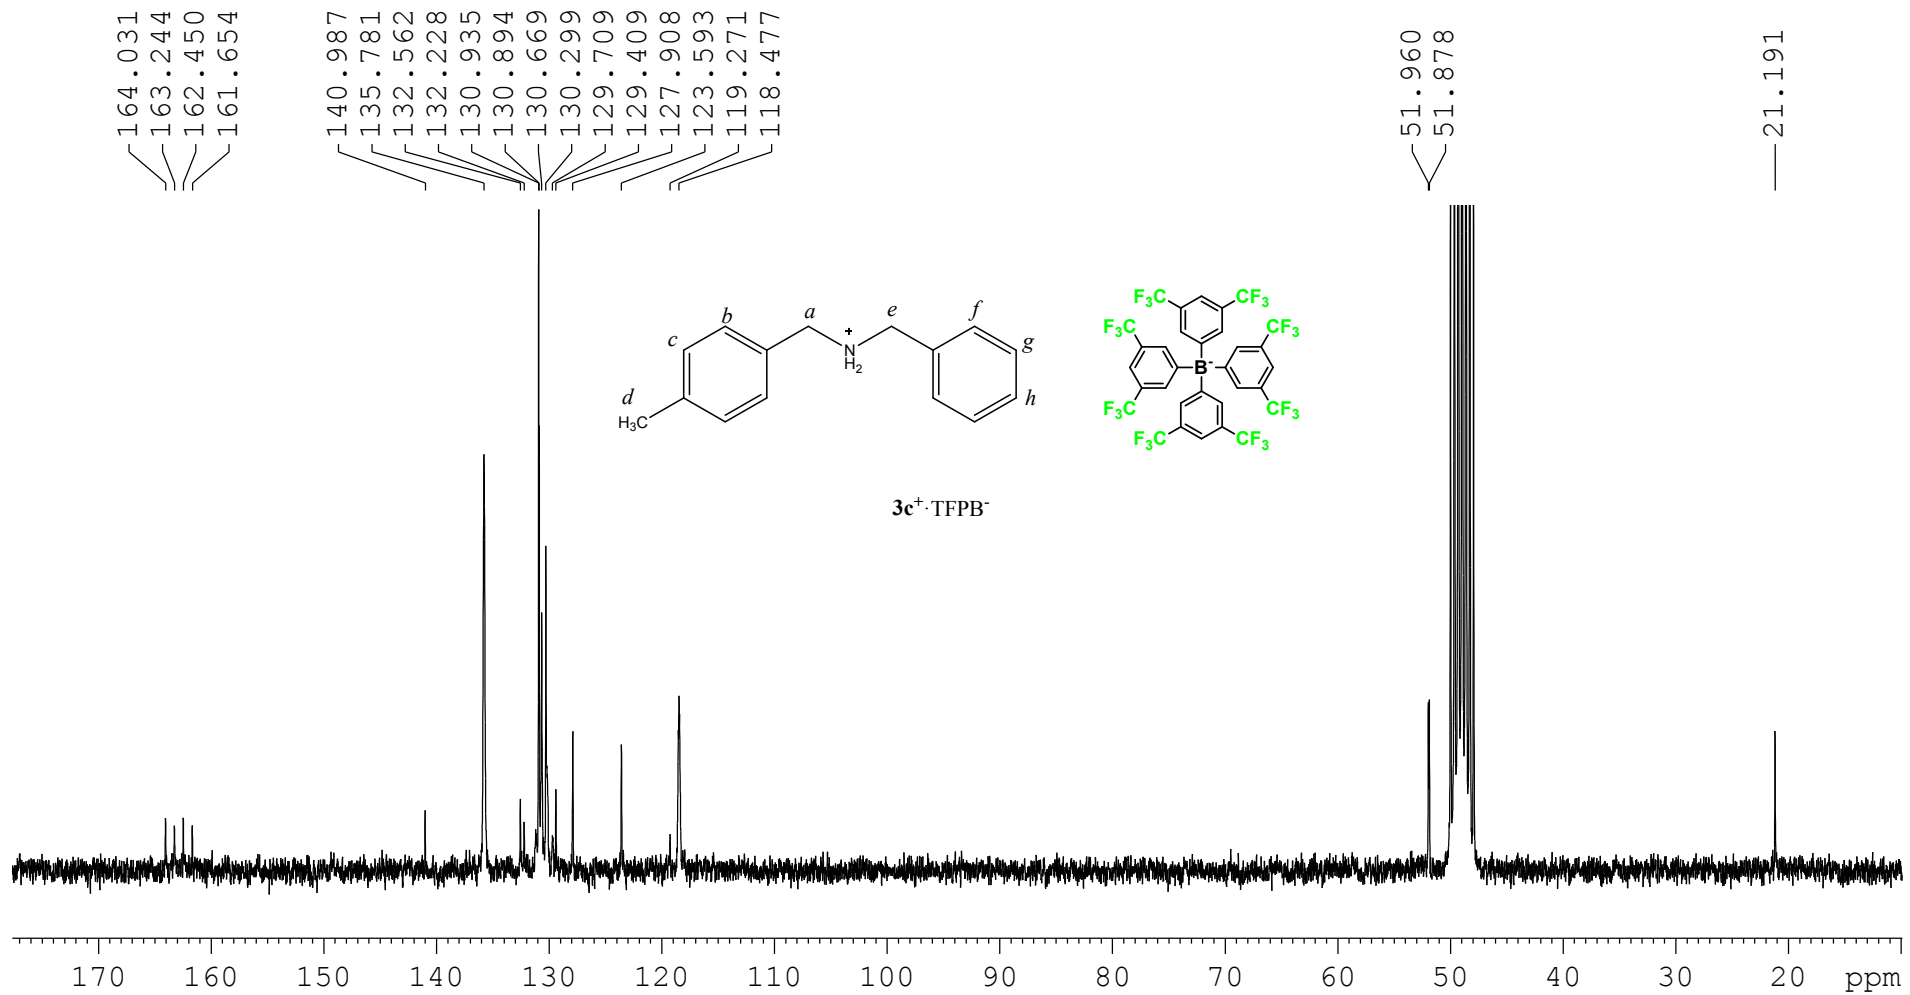

**Figure S14.** <sup>13</sup>C NMR spectrum of derivative **3c<sup>+</sup>·TFPB<sup>-</sup>** (63 MHz, CD<sub>3</sub>OD, 298 K).

# Derivative $3d^+ \cdot TFPB^-$

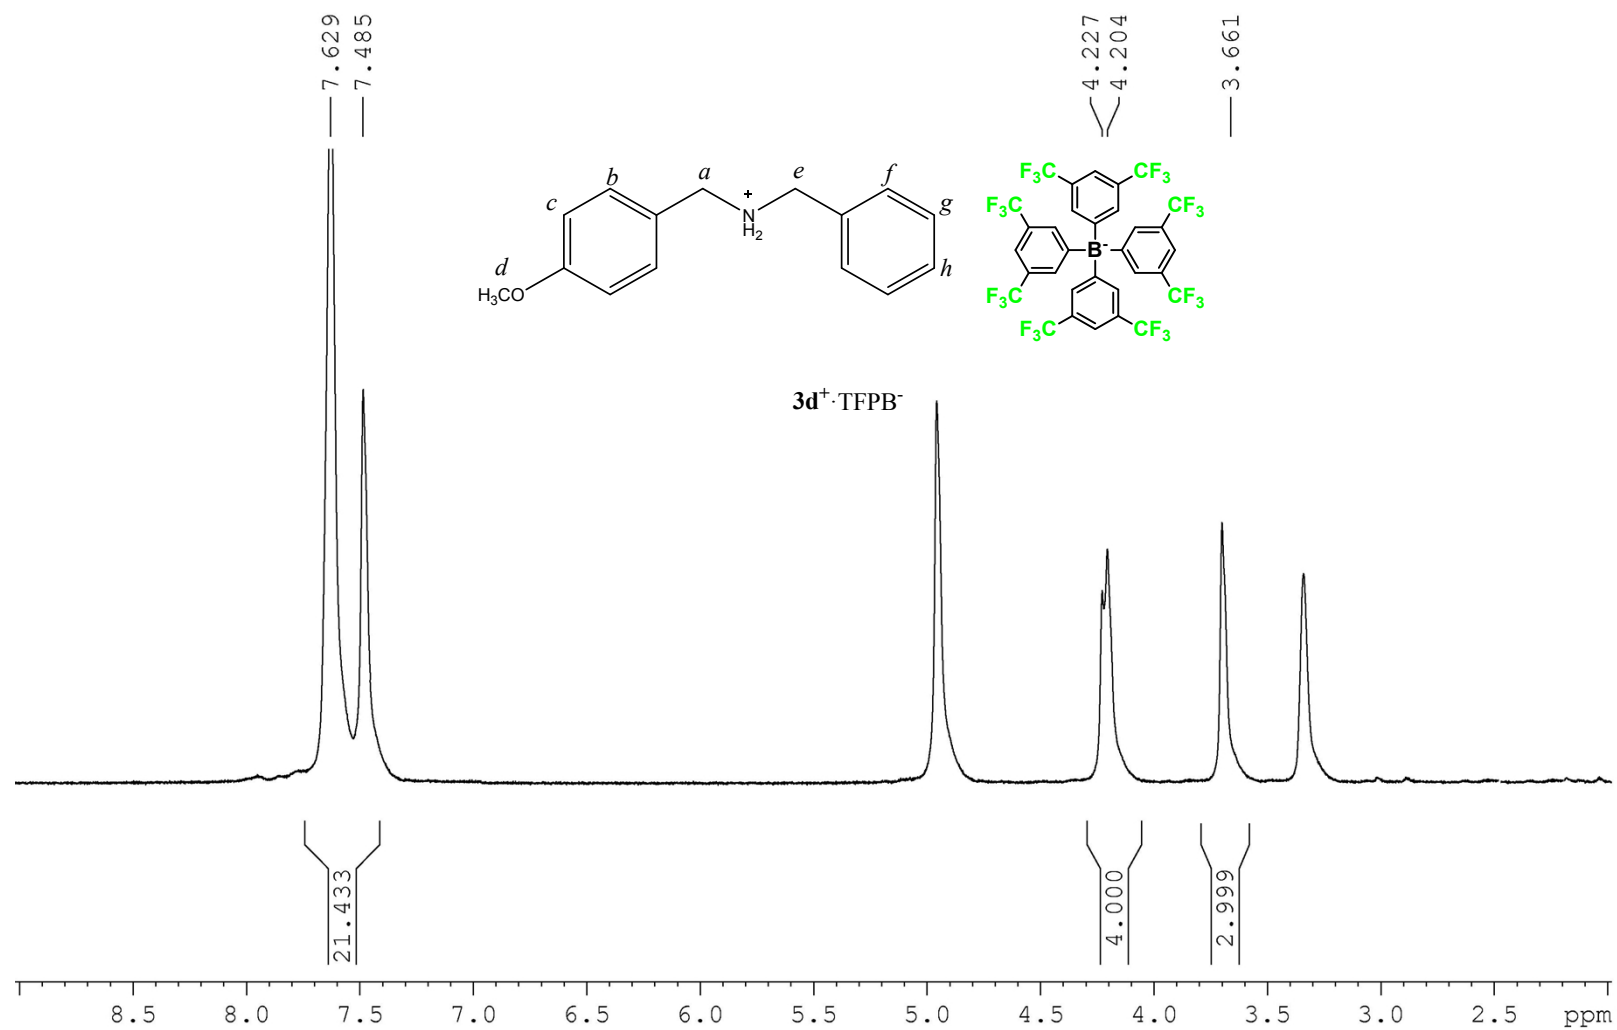

**Figure S15.**  $^1\text{H}$  NMR spectrum of derivate  $3d^+ \cdot TFPB^-$  (250 MHz,  $\text{CD}_3\text{OD}$ , 298 K).

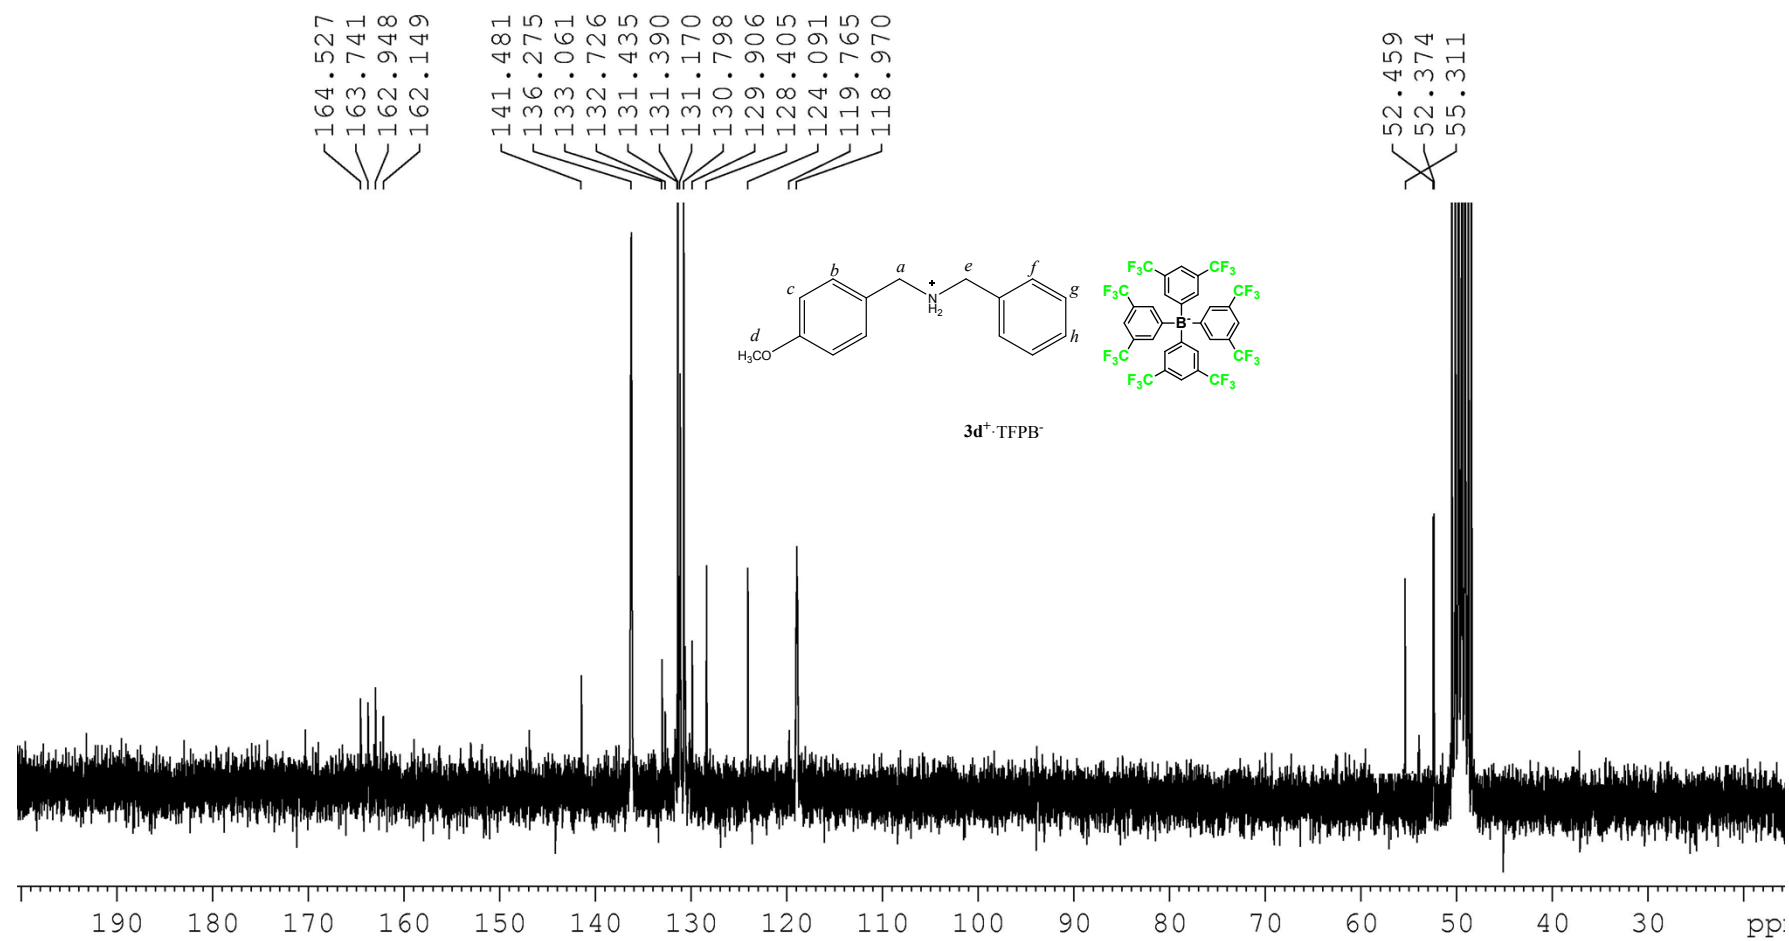

**Figure S16.**  $^{13}\text{C}$  NMR spectrum of derivative  $3\text{d}^+\cdot\text{TFPB}^-$  (63 MHz,  $\text{CD}_3\text{OD}$ , 298 K).

# $^1\text{H}$ and $^{13}\text{C}$ NMR spectra of $10\text{c-e}^+\cdot\text{Cl}^-$ salts

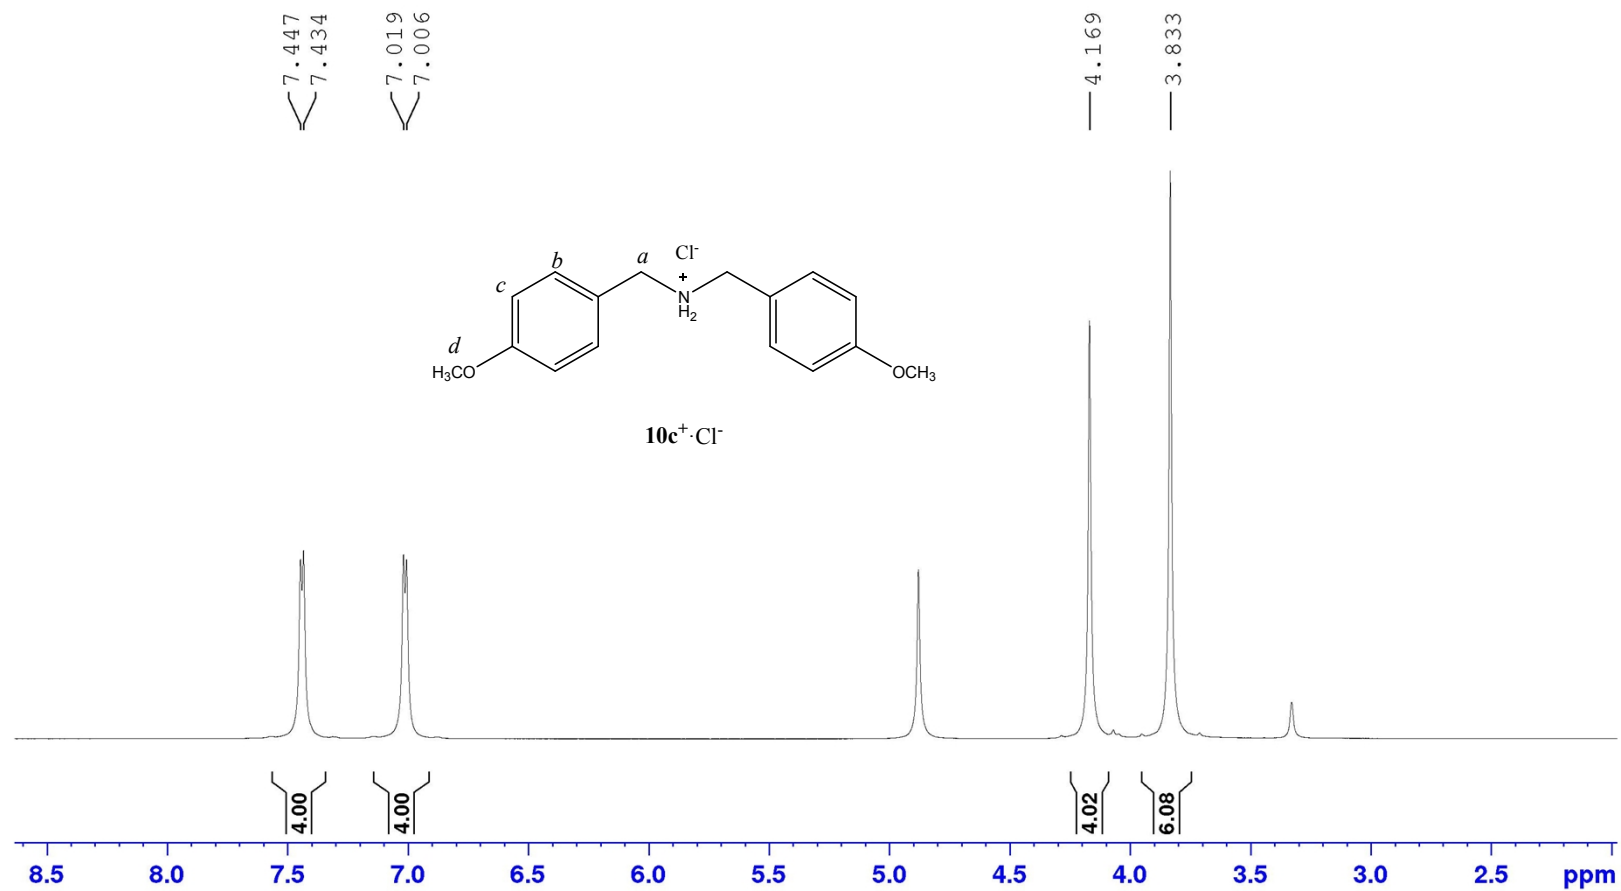

Figure S17.  $^1\text{H}$  NMR spectrum of derivative  $10\text{c}^+\cdot\text{Cl}^-$  (600 MHz,  $\text{CD}_3\text{OD}$ , 298 K).

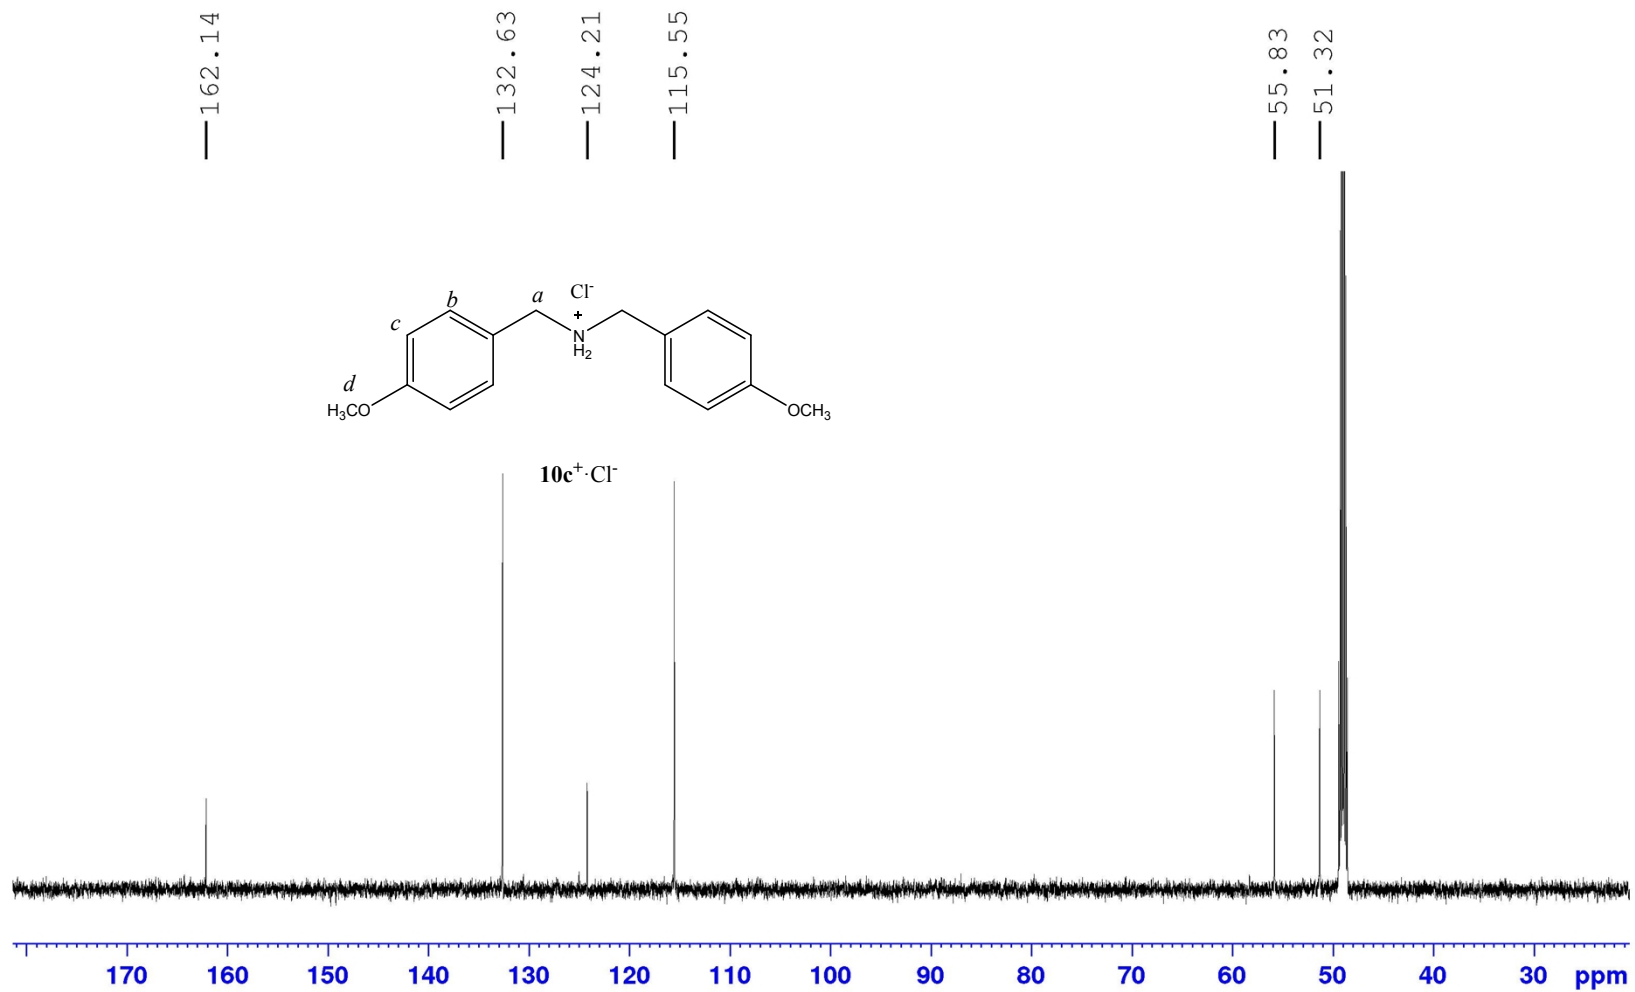

**Figure S18.** <sup>13</sup>C NMR spectrum of derivative **10c<sup>+</sup>·Cl<sup>-</sup>** (150 MHz, CD<sub>3</sub>OD, 298 K).



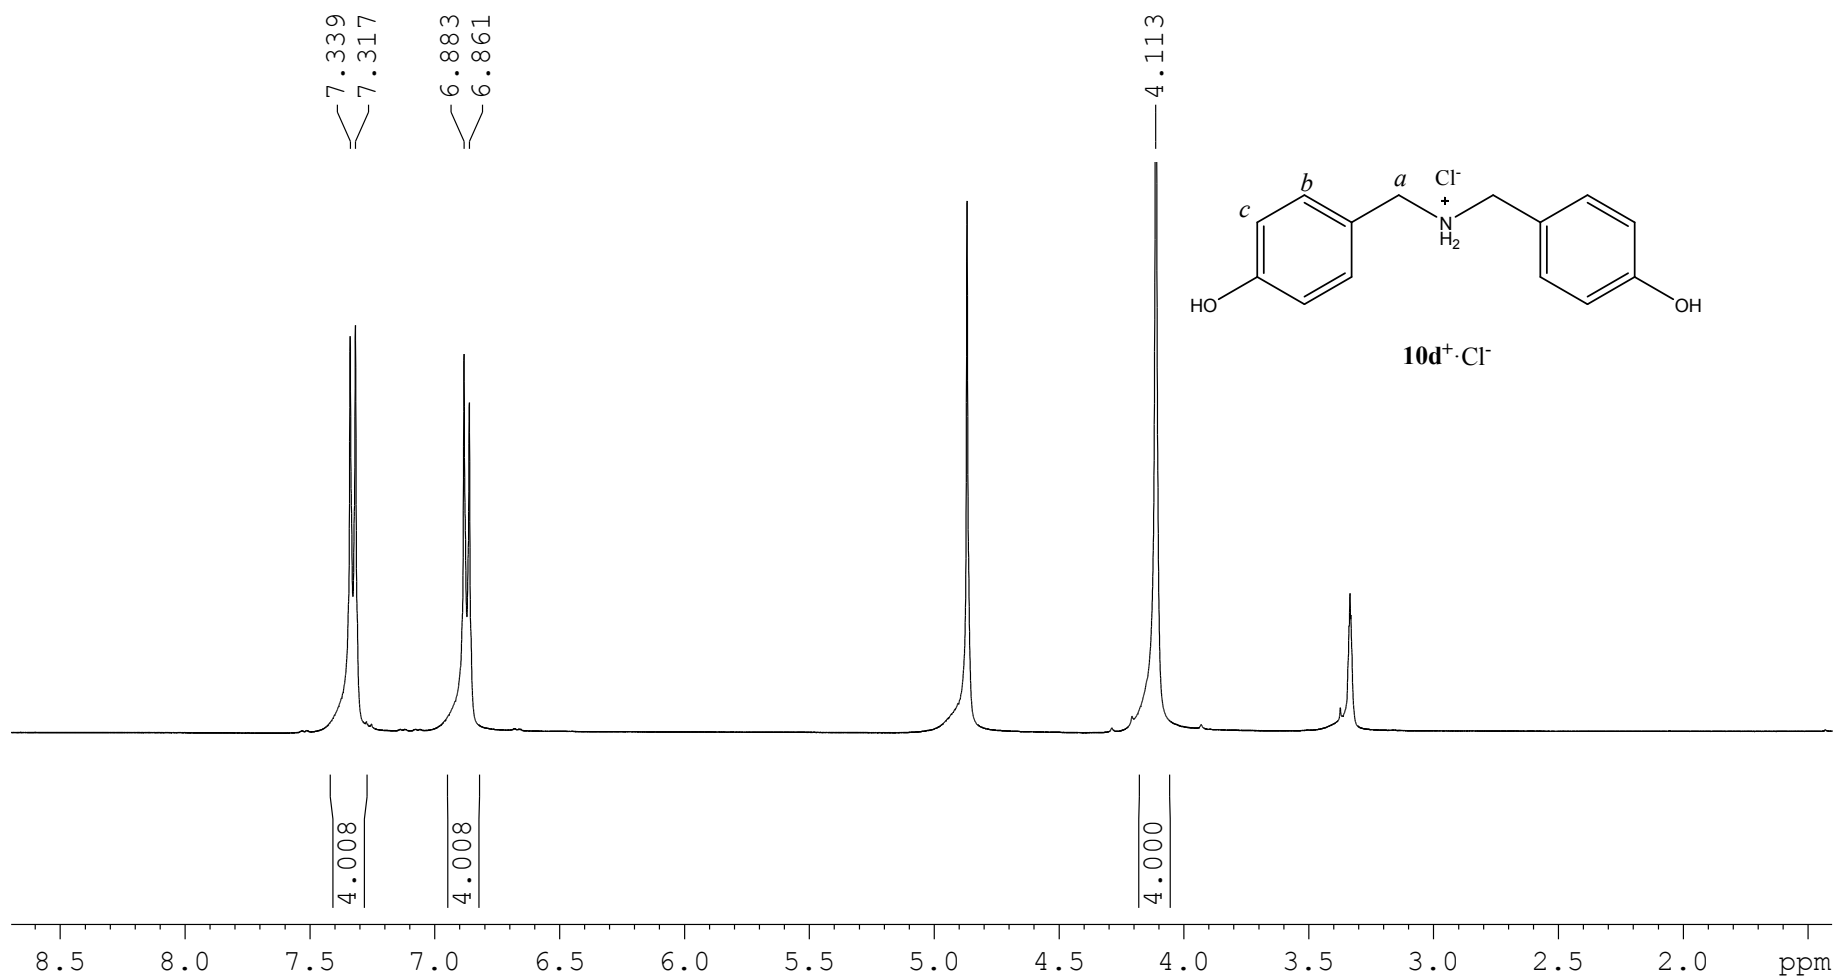

**Figure S19.**  $^1\text{H}$  NMR spectrum of derivative  $10\text{d}^+\cdot\text{Cl}^-$  (400 MHz,  $\text{CD}_3\text{OD}$ , 298 K).

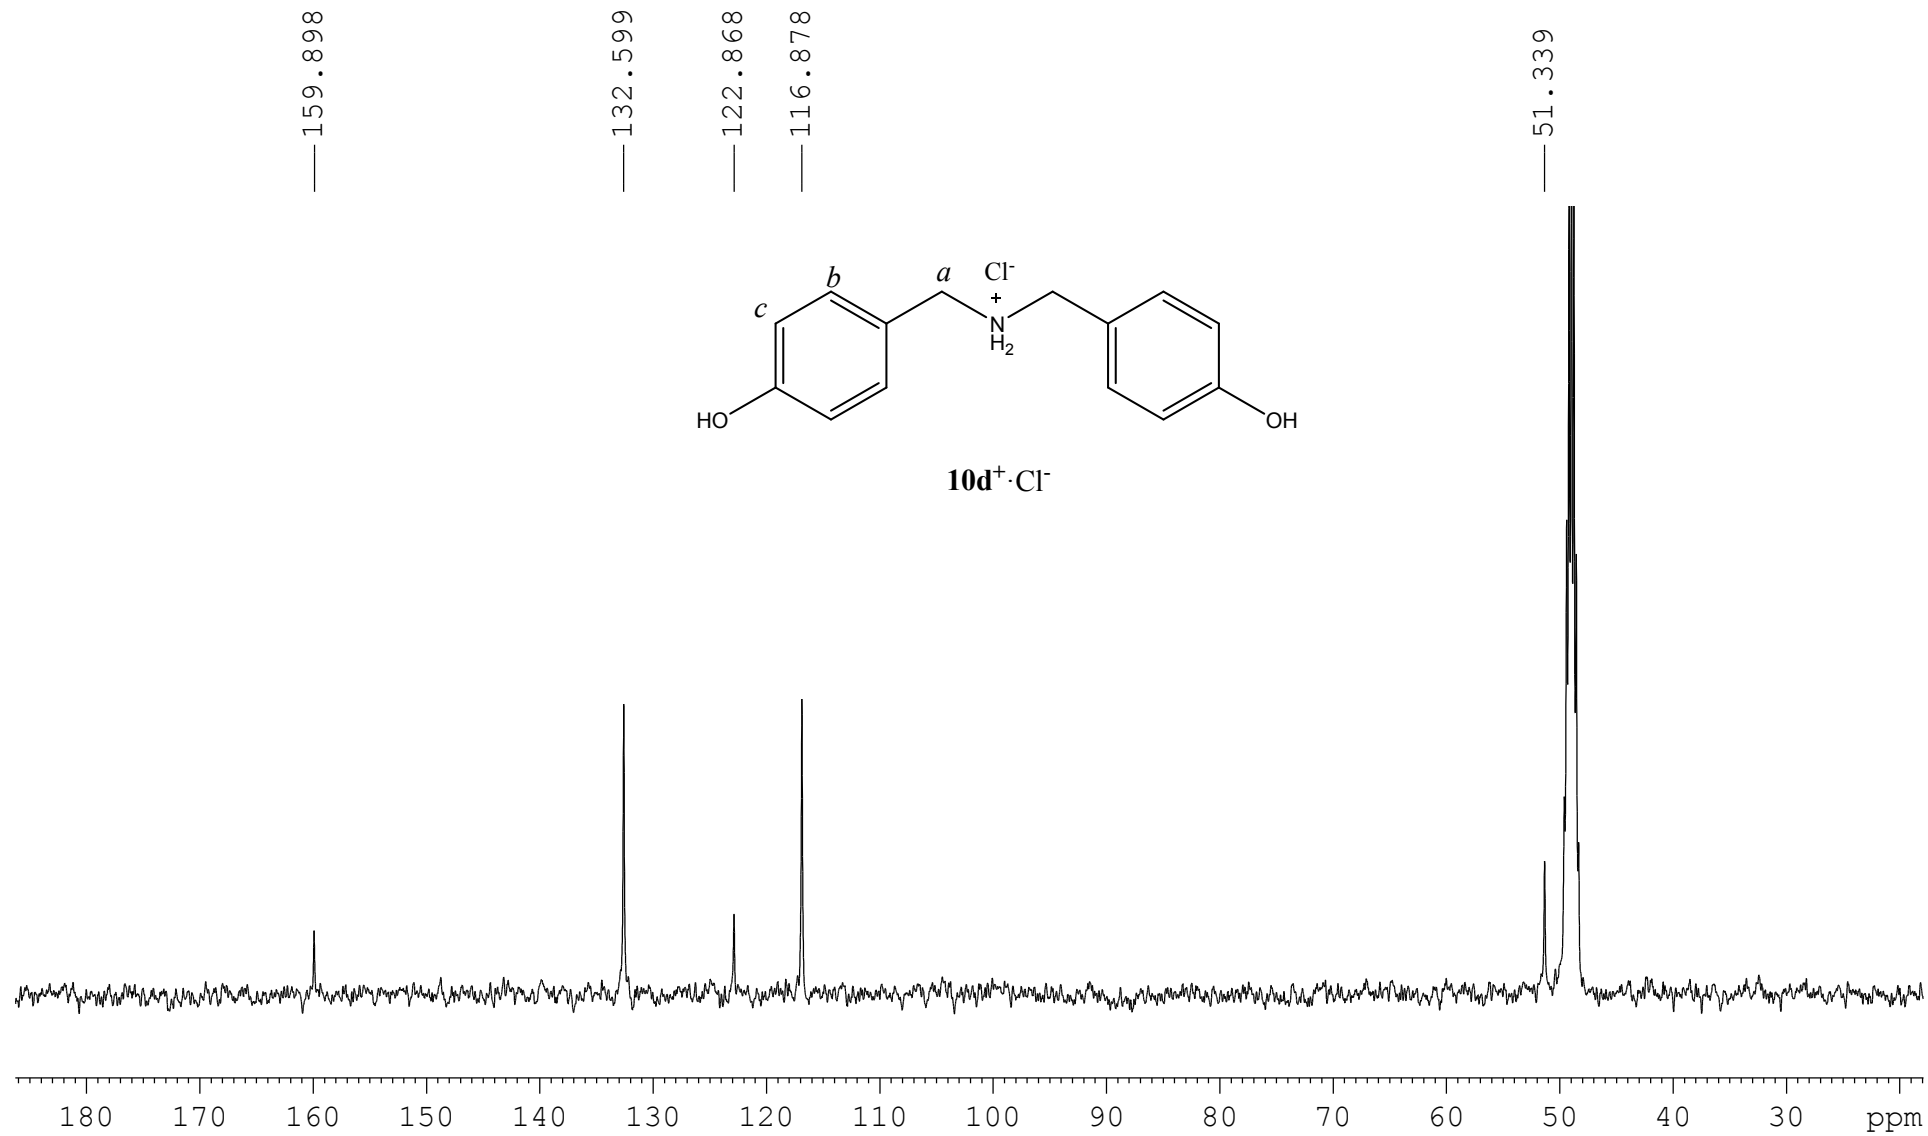

**Figure S20.**  $^{13}\text{C}$  NMR spectrum of derivative  $10\text{d}^+\cdot\text{Cl}^-$  (100 MHz,  $\text{CD}_3\text{OD}$ , 298 K).

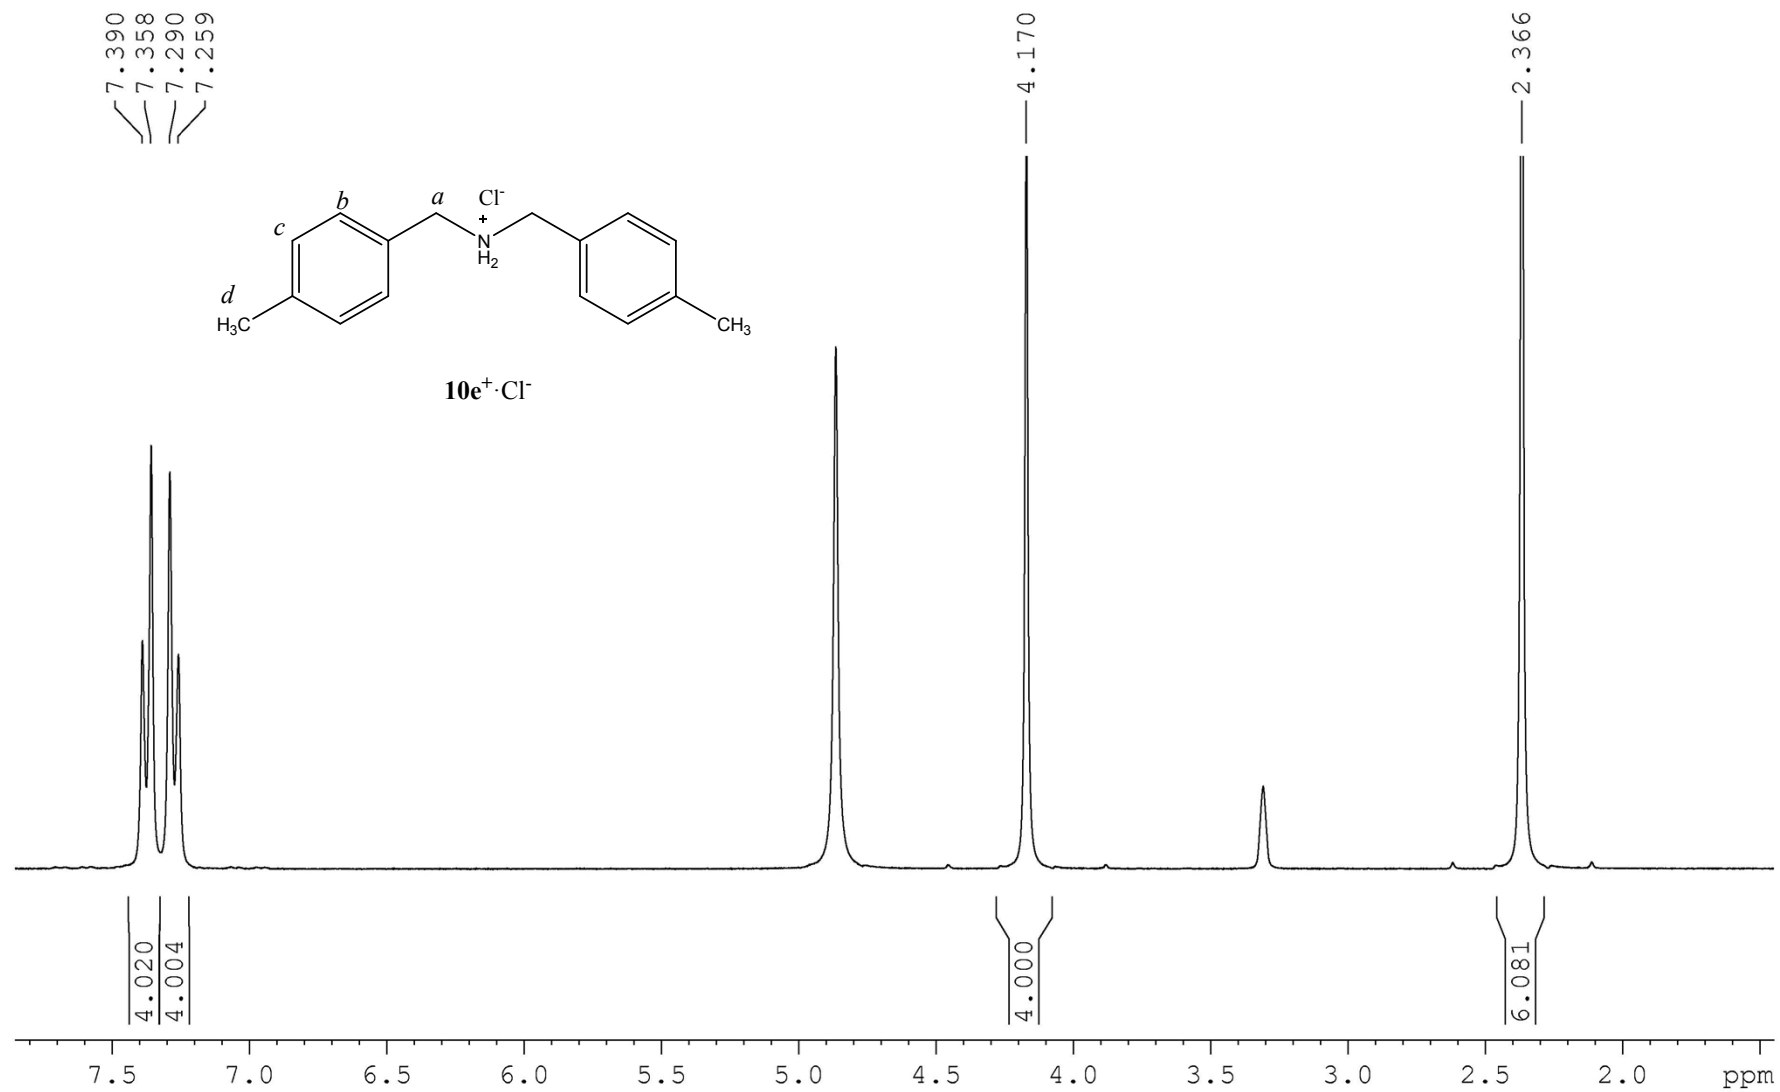

**Figure S21.** <sup>1</sup>H NMR spectrum of derivative **10e<sup>+</sup>·Cl<sup>-</sup>** (250 MHz, CD<sub>3</sub>OD, 298 K).

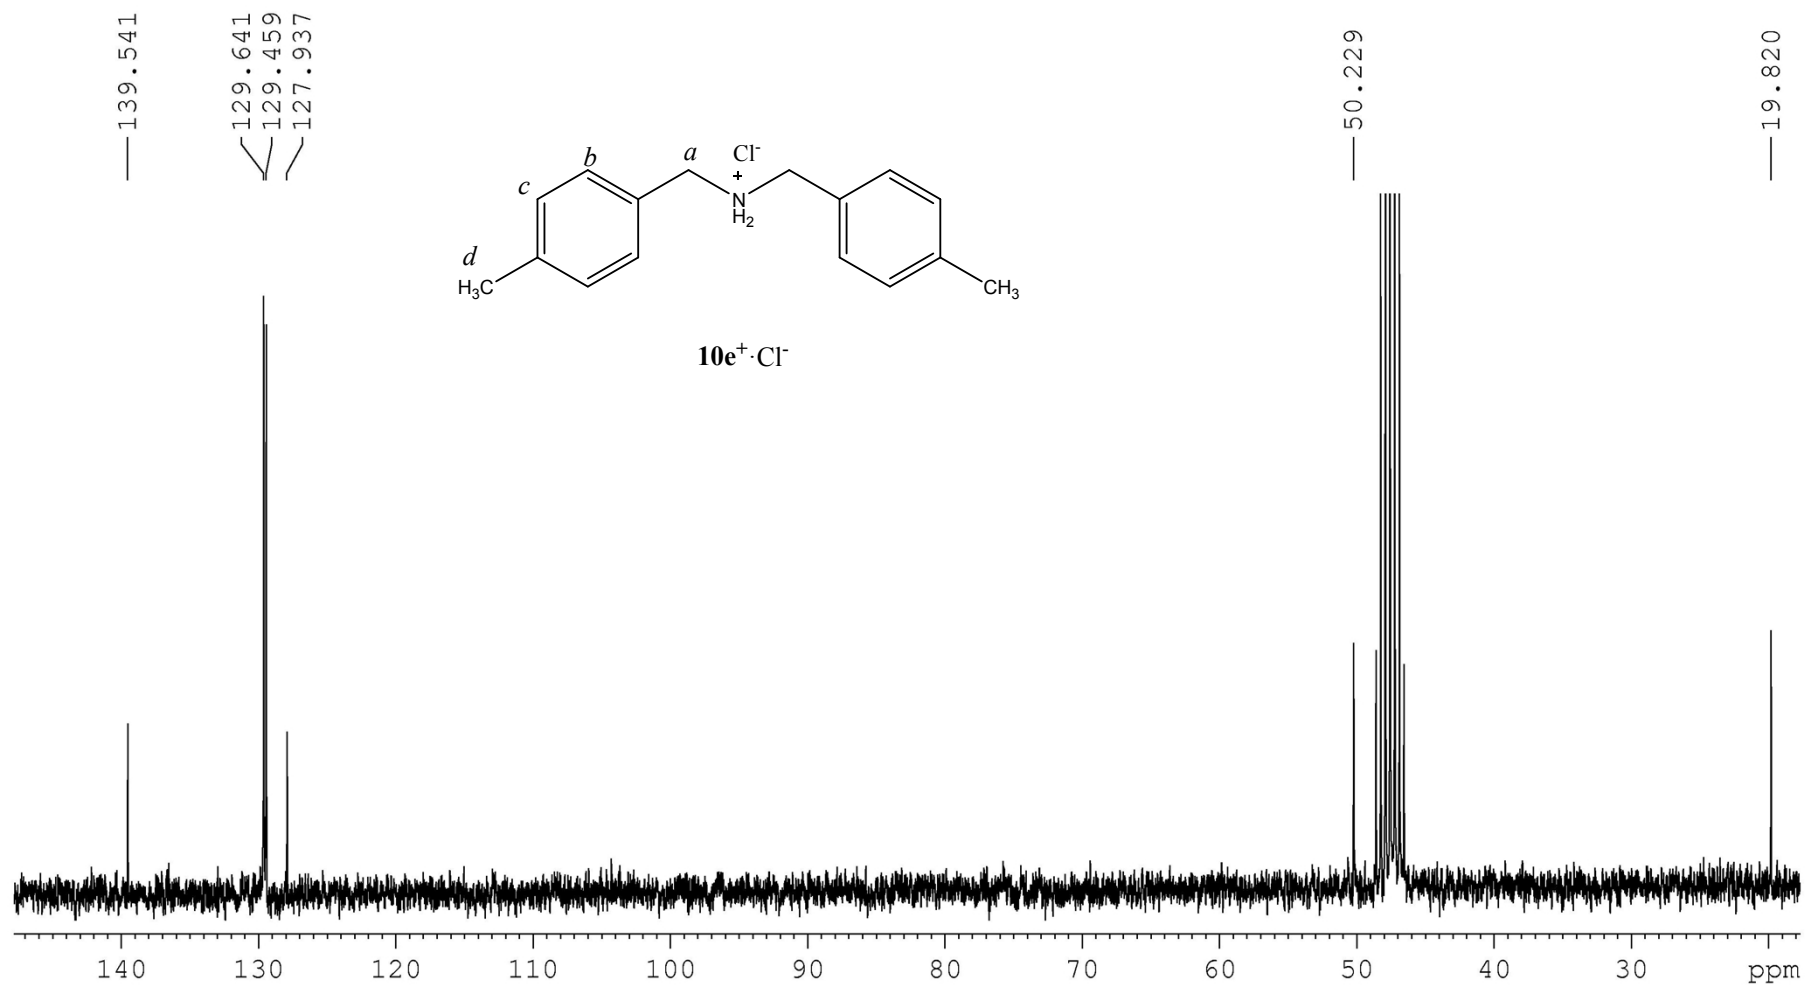

**Figure S22.**  $^{13}\text{C}$  NMR spectrum of derivative  $10\text{e}^+\cdot\text{Cl}^-$  (63 MHz,  $\text{CD}_3\text{OD}$ , 298 K).

# $^1\text{H}$ and $^{13}\text{C}$ NMR spectra of $4\text{b-f}^+\cdot\text{TFPB}^-$ salts

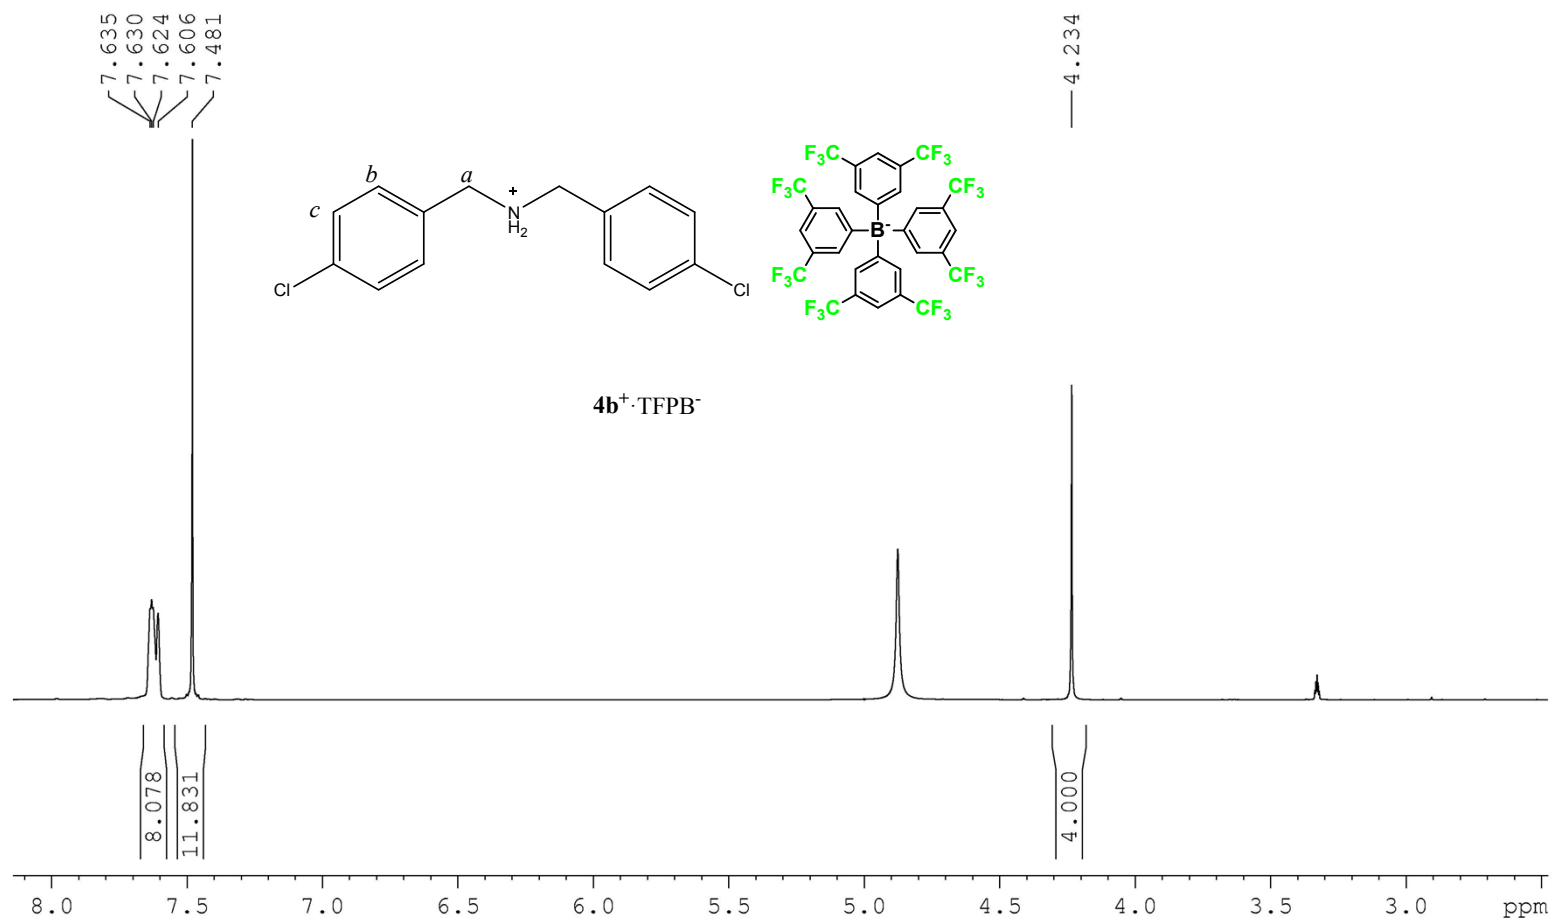

Figure S23.  $^1\text{H}$  NMR spectrum of derivative  $4\text{b}^+\cdot\text{TFPB}^-$  (400 MHz,  $\text{CD}_3\text{OD}$ , 298 K).

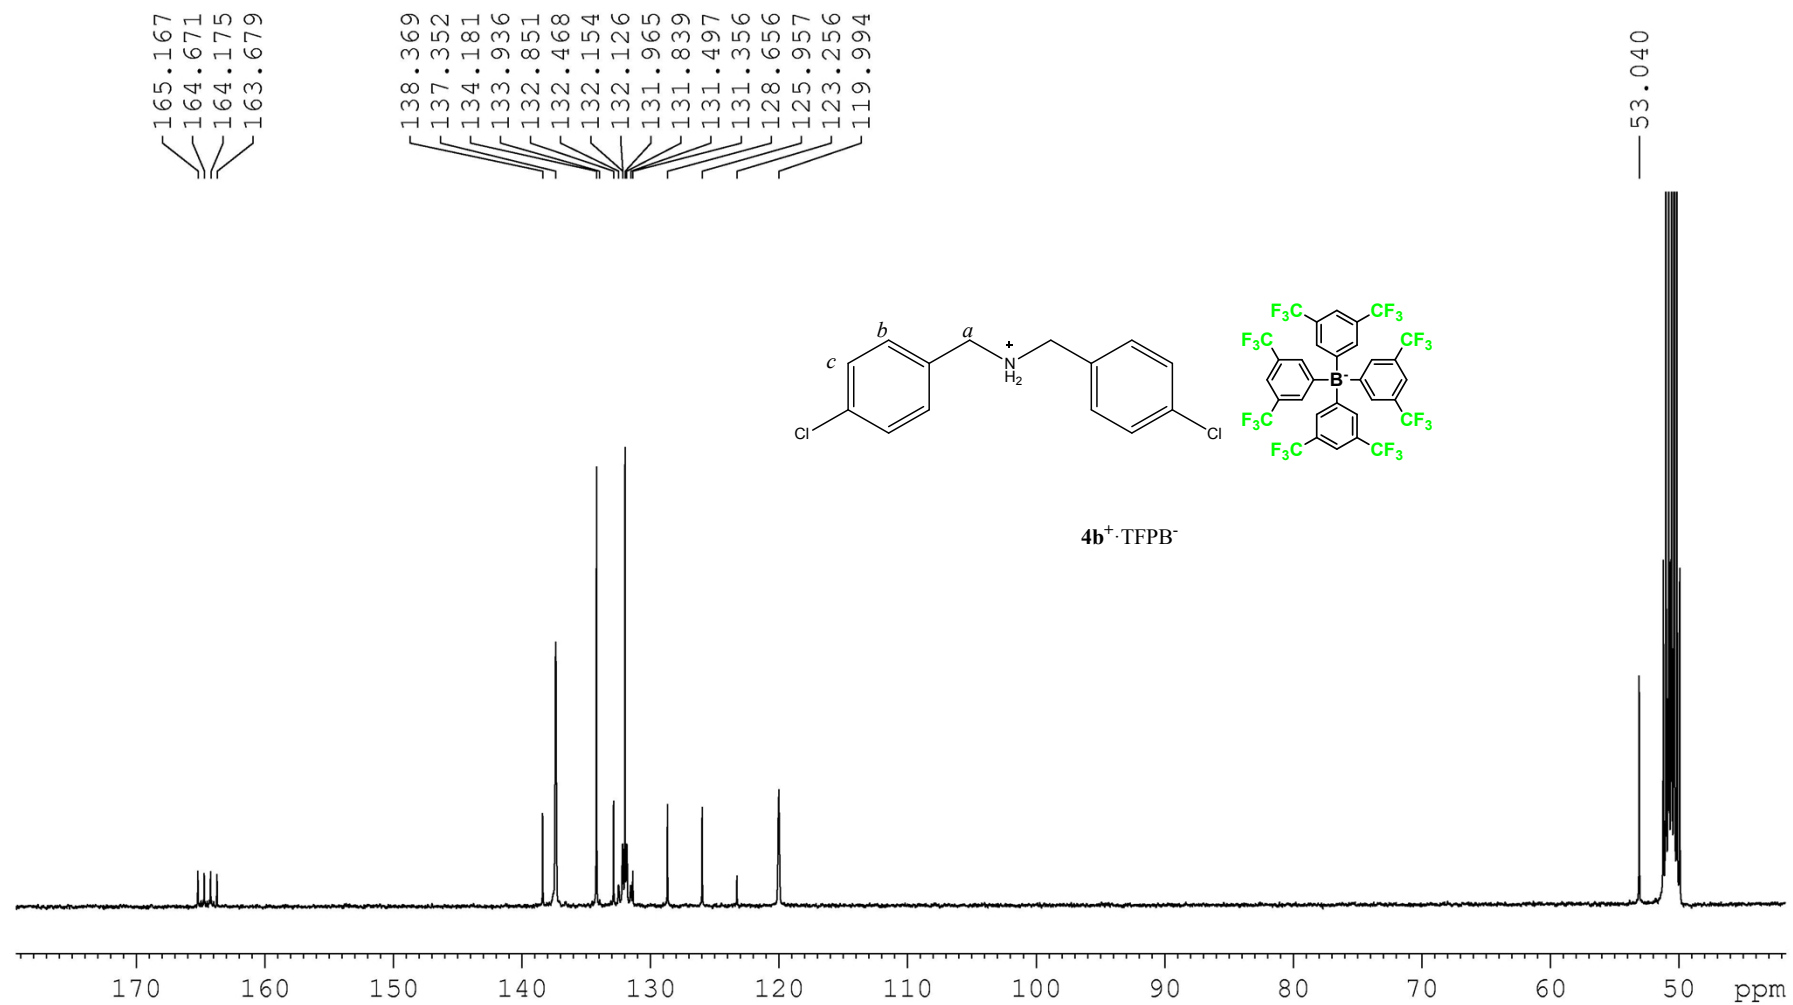

Figure S24.  $^{13}C$  NMR spectrum of derivative  $4b^+ \cdot TFPB^-$  (100 MHz,  $CD_3OD$ , 298 K).

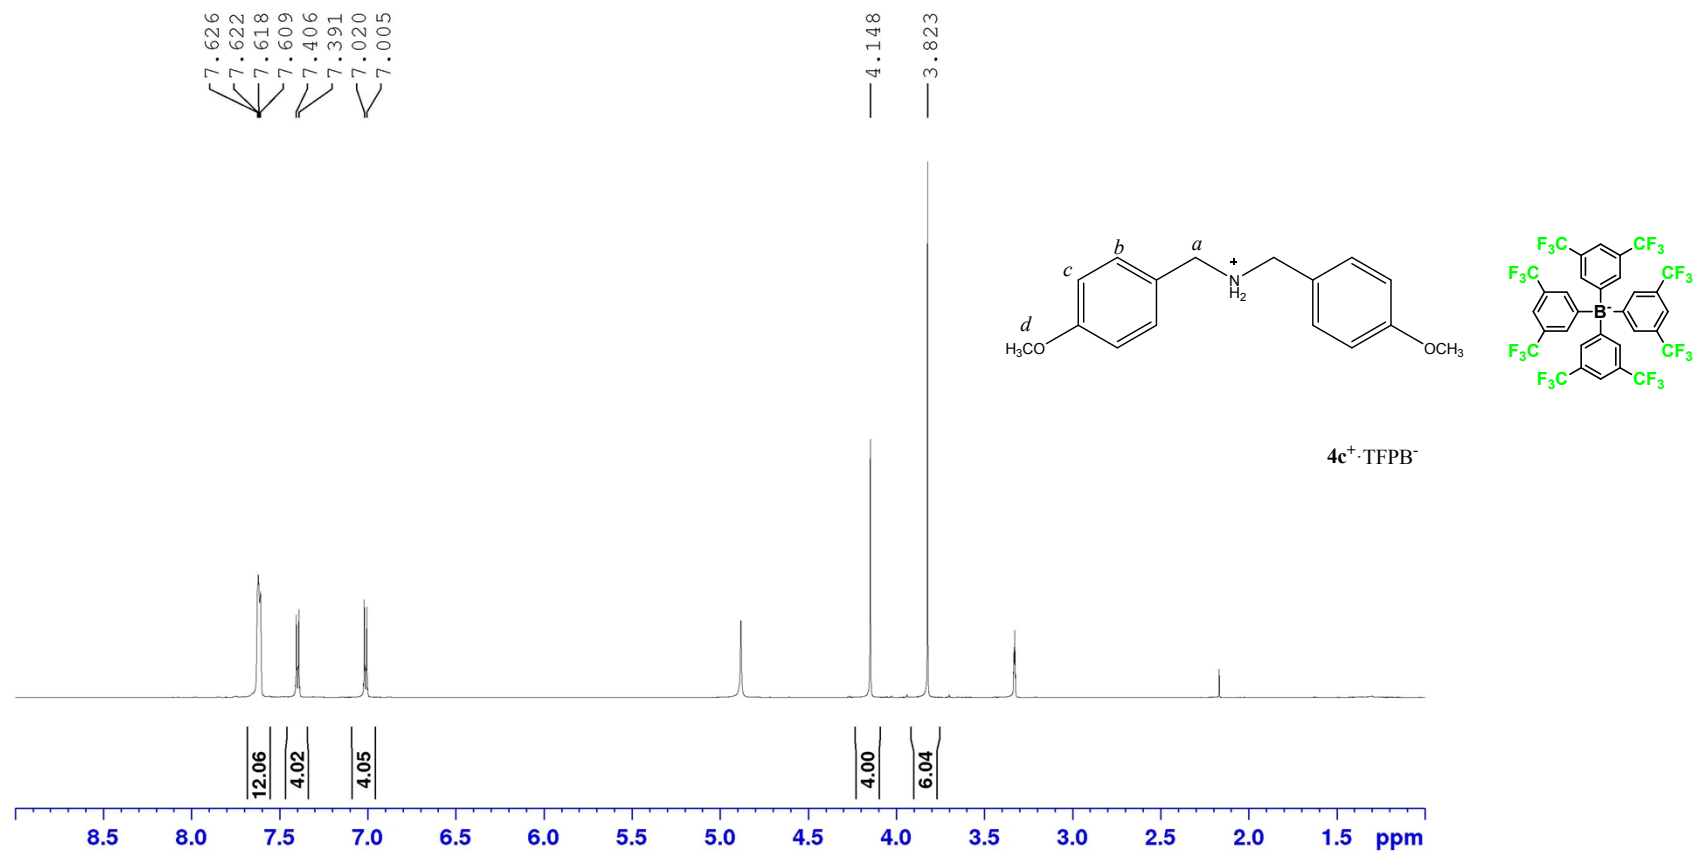

**Figure S25.**  $^1H$  NMR spectrum of derivative  $4c^+ \cdot TFPB^-$  (600 MHz,  $CD_3OD$ , 298 K).

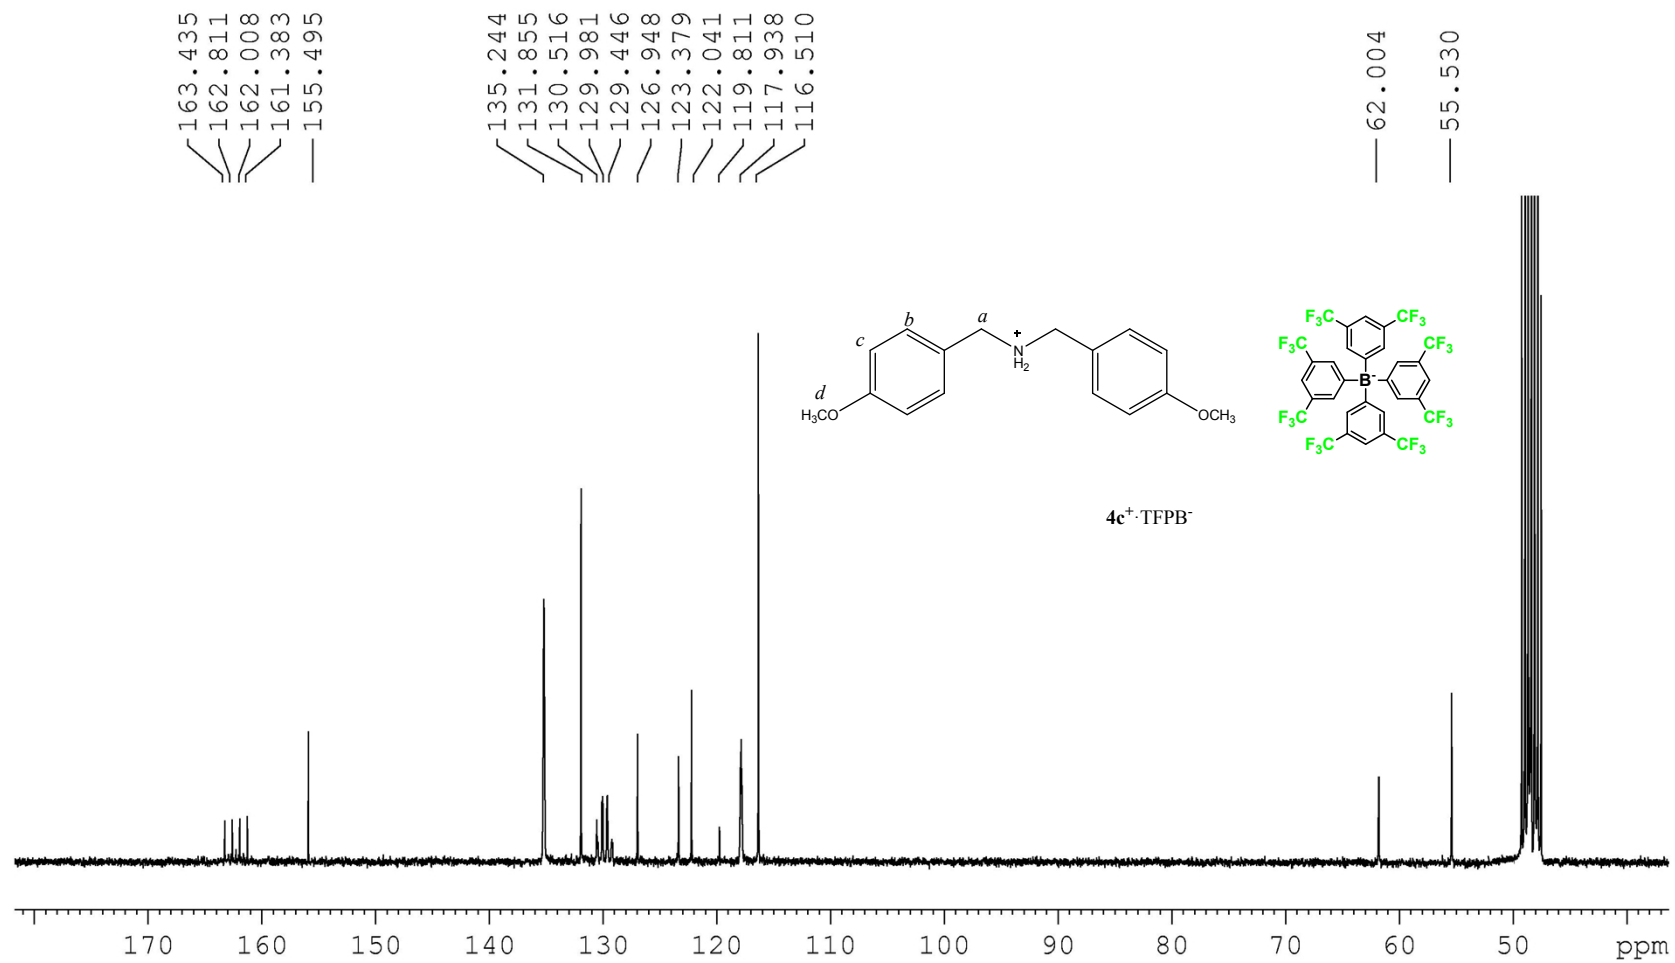

**Figure S26.**  $^{13}\text{C}$  NMR spectrum of derivative  $4\text{c}^+\cdot\text{TFPB}^-$  (100 MHz,  $\text{CD}_3\text{OD}$ , 298 K).



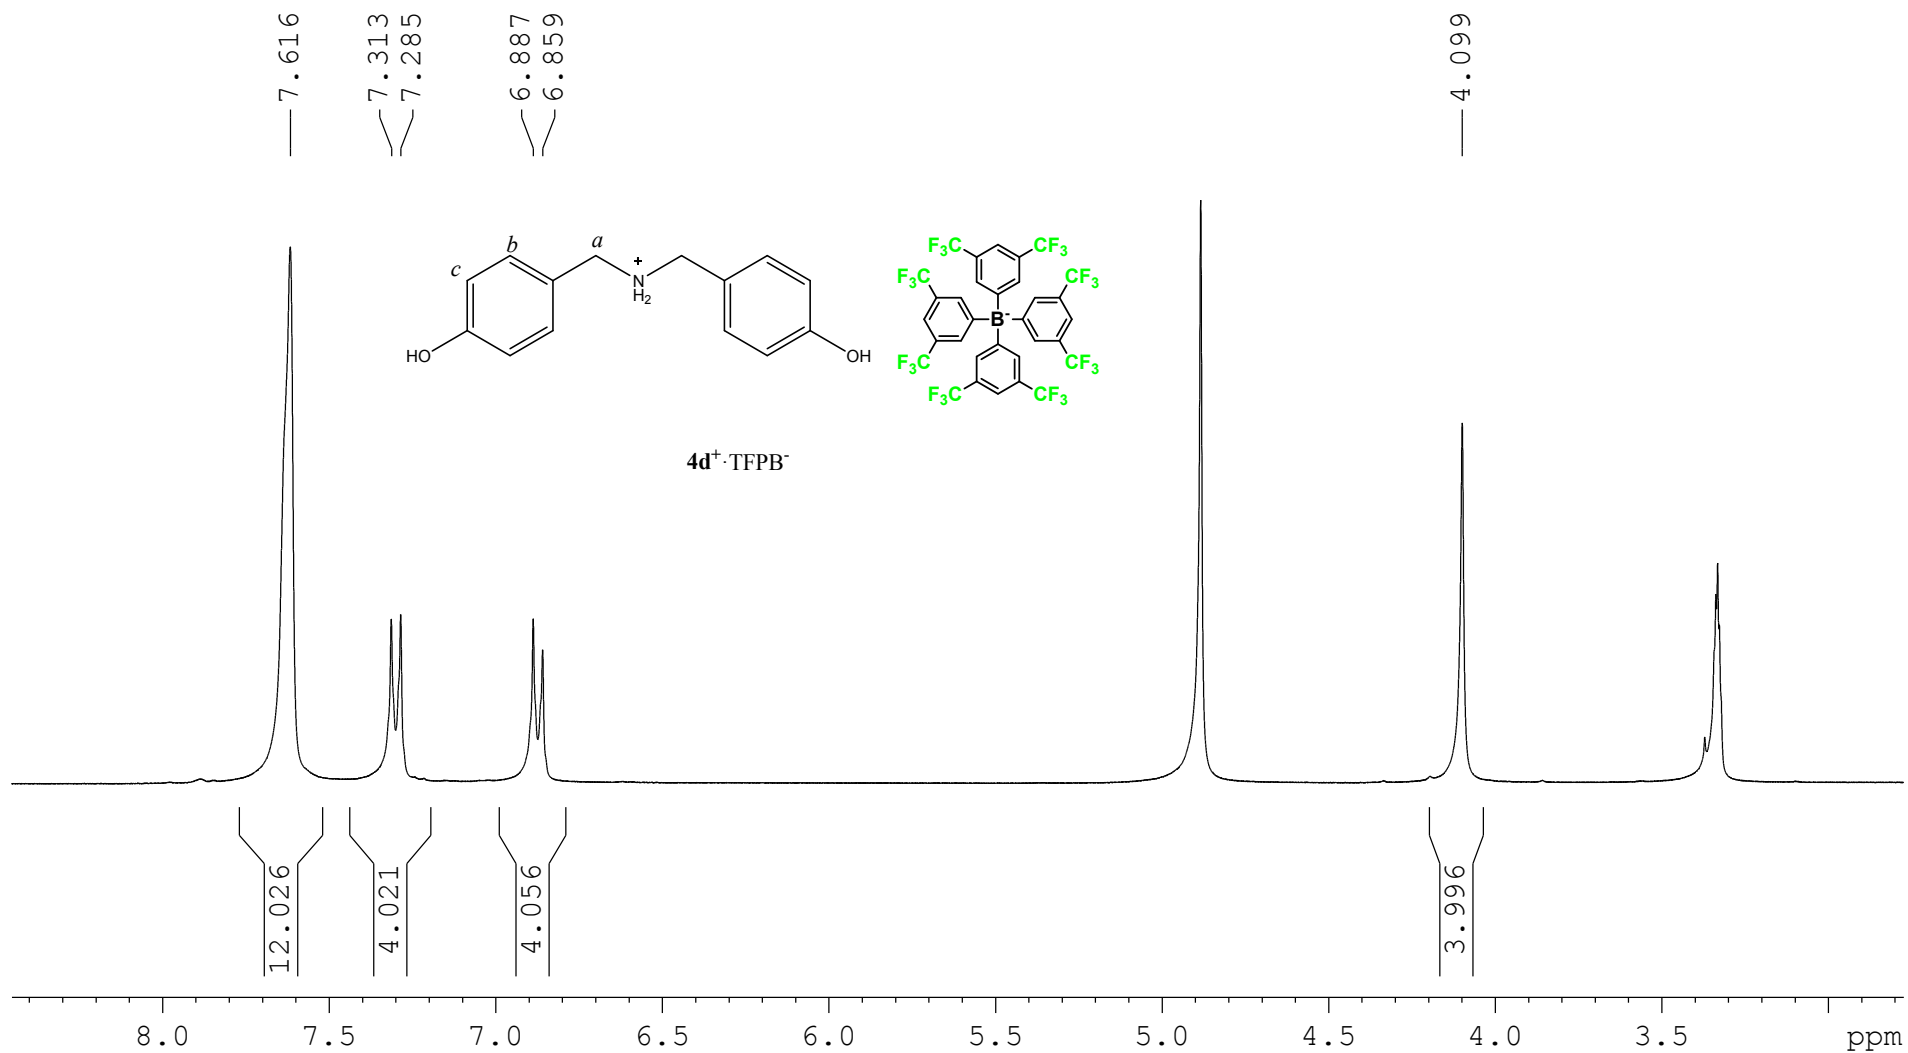

**Figure S27.** <sup>1</sup>H NMR spectrum of derivative **4d<sup>+</sup>·TFPB<sup>-</sup>** (300 MHz, CD<sub>3</sub>OD, 298 K).

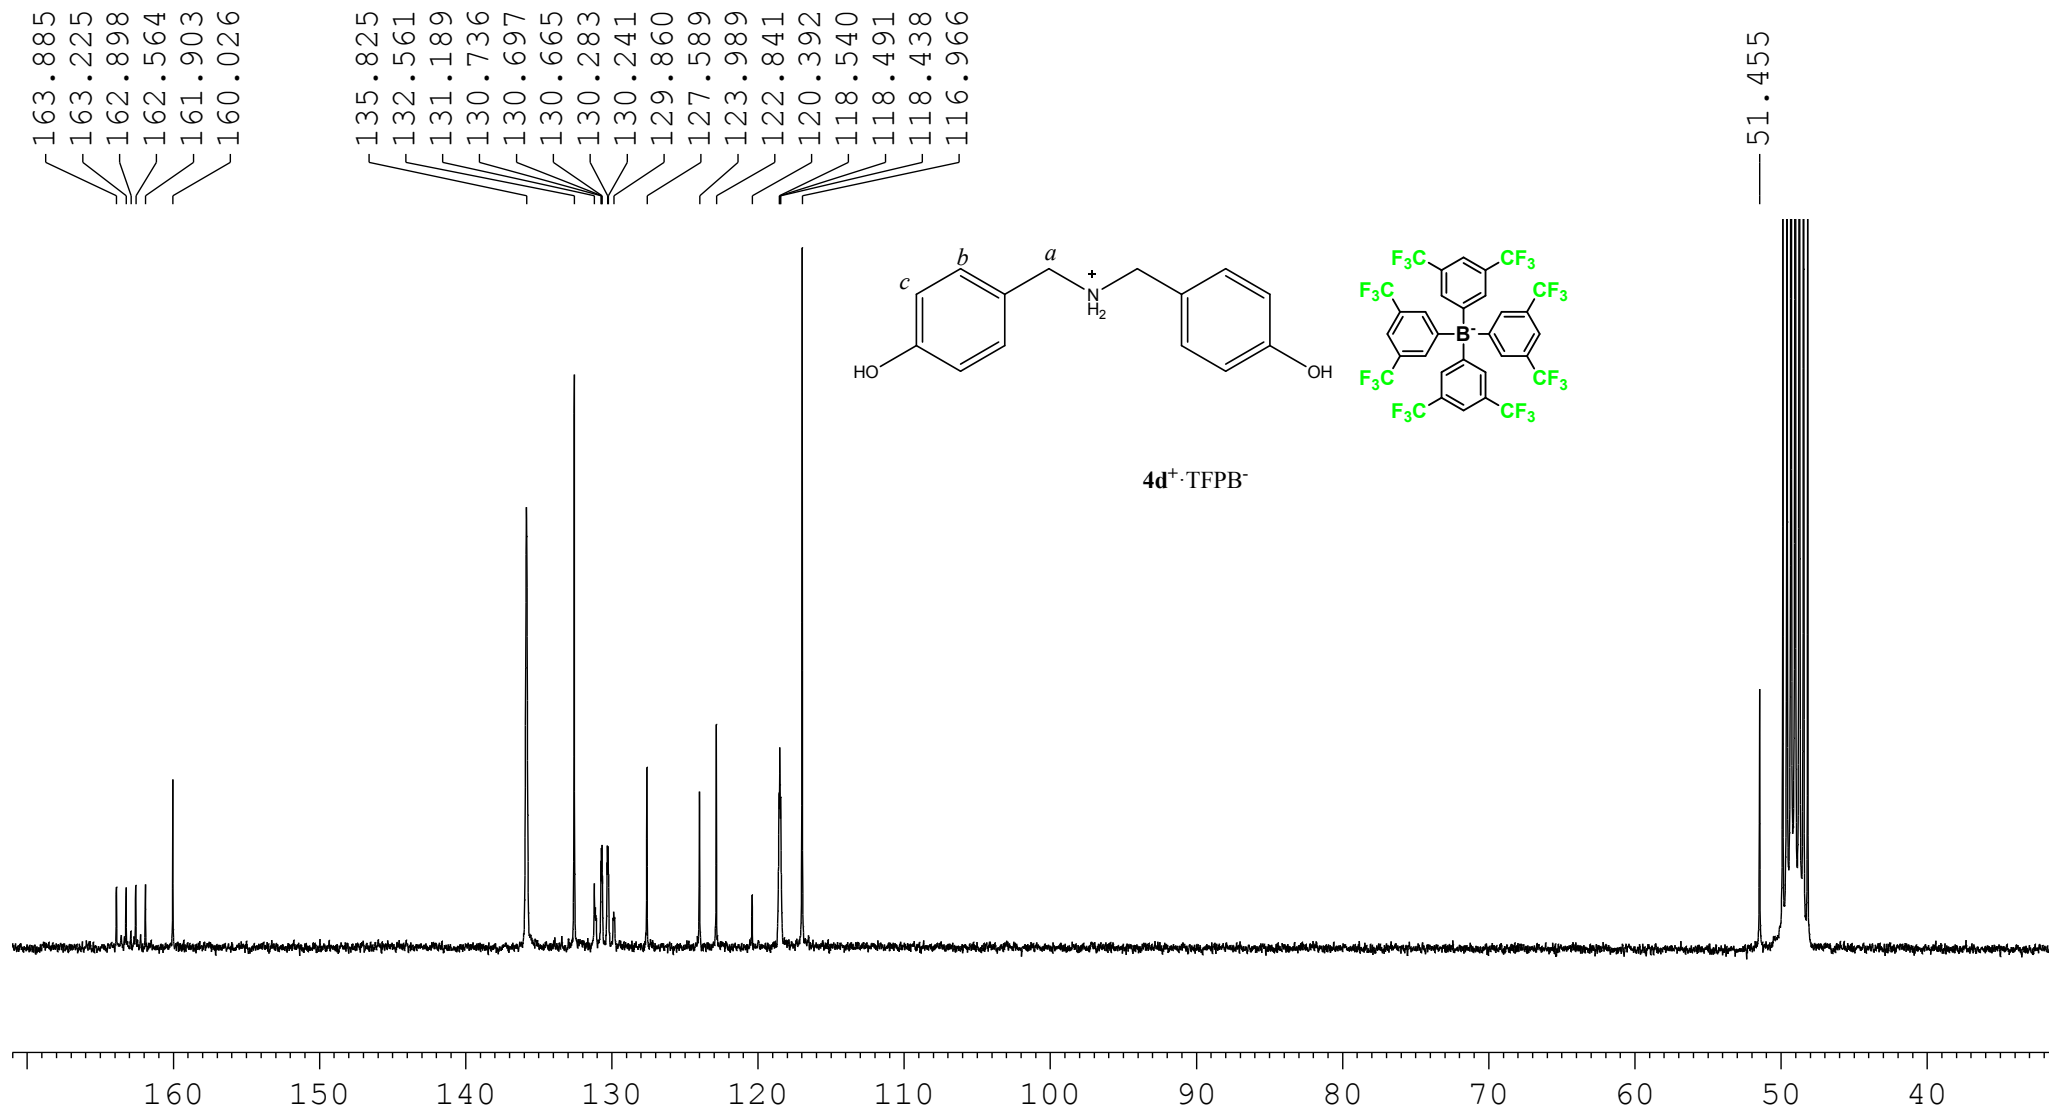

**Figure S28.**  $^{13}\text{C}$  NMR spectrum of derivative  $4\text{d}^+\cdot\text{TFPB}^-$  (75 MHz,  $\text{CD}_3\text{OD}$ , 298 K).

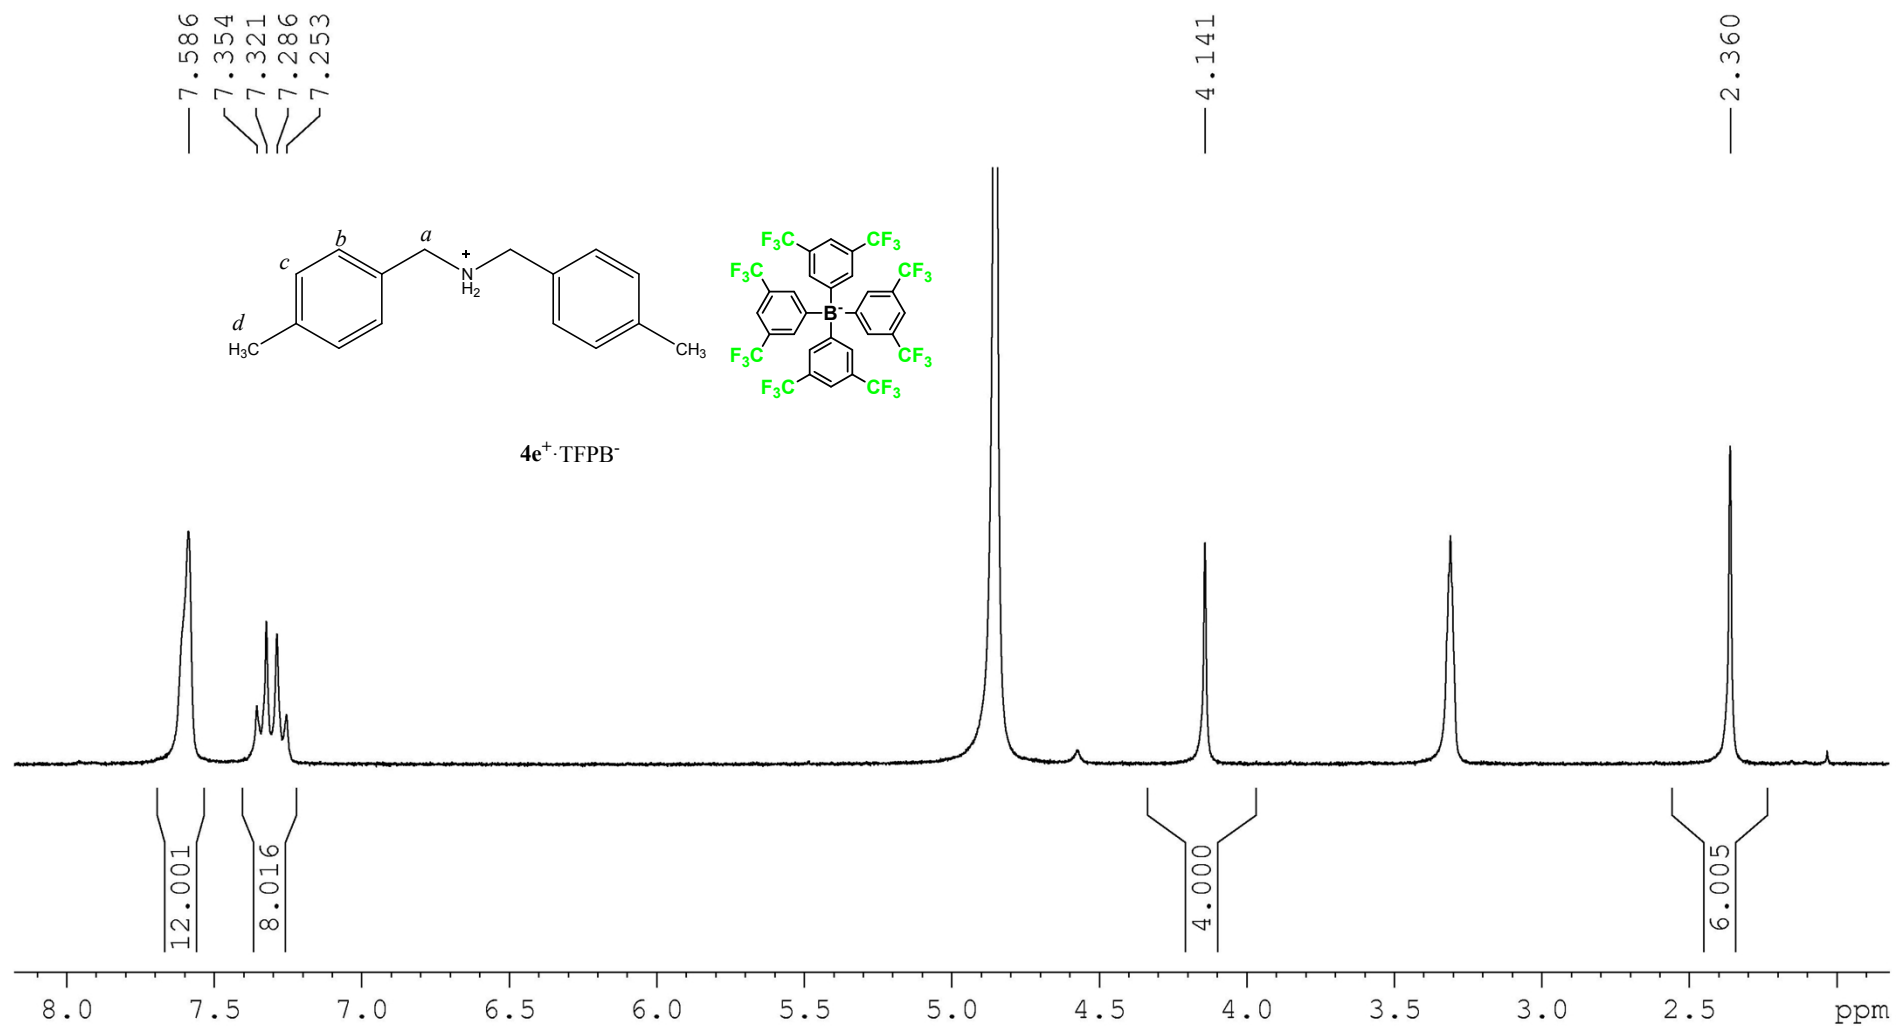

**Figure S29.**  $^1\text{H}$  NMR spectrum of derivative  $4\text{e}^+\cdot\text{TFPB}^-$  (250 MHz,  $\text{CD}_3\text{OD}$ , 298 K).

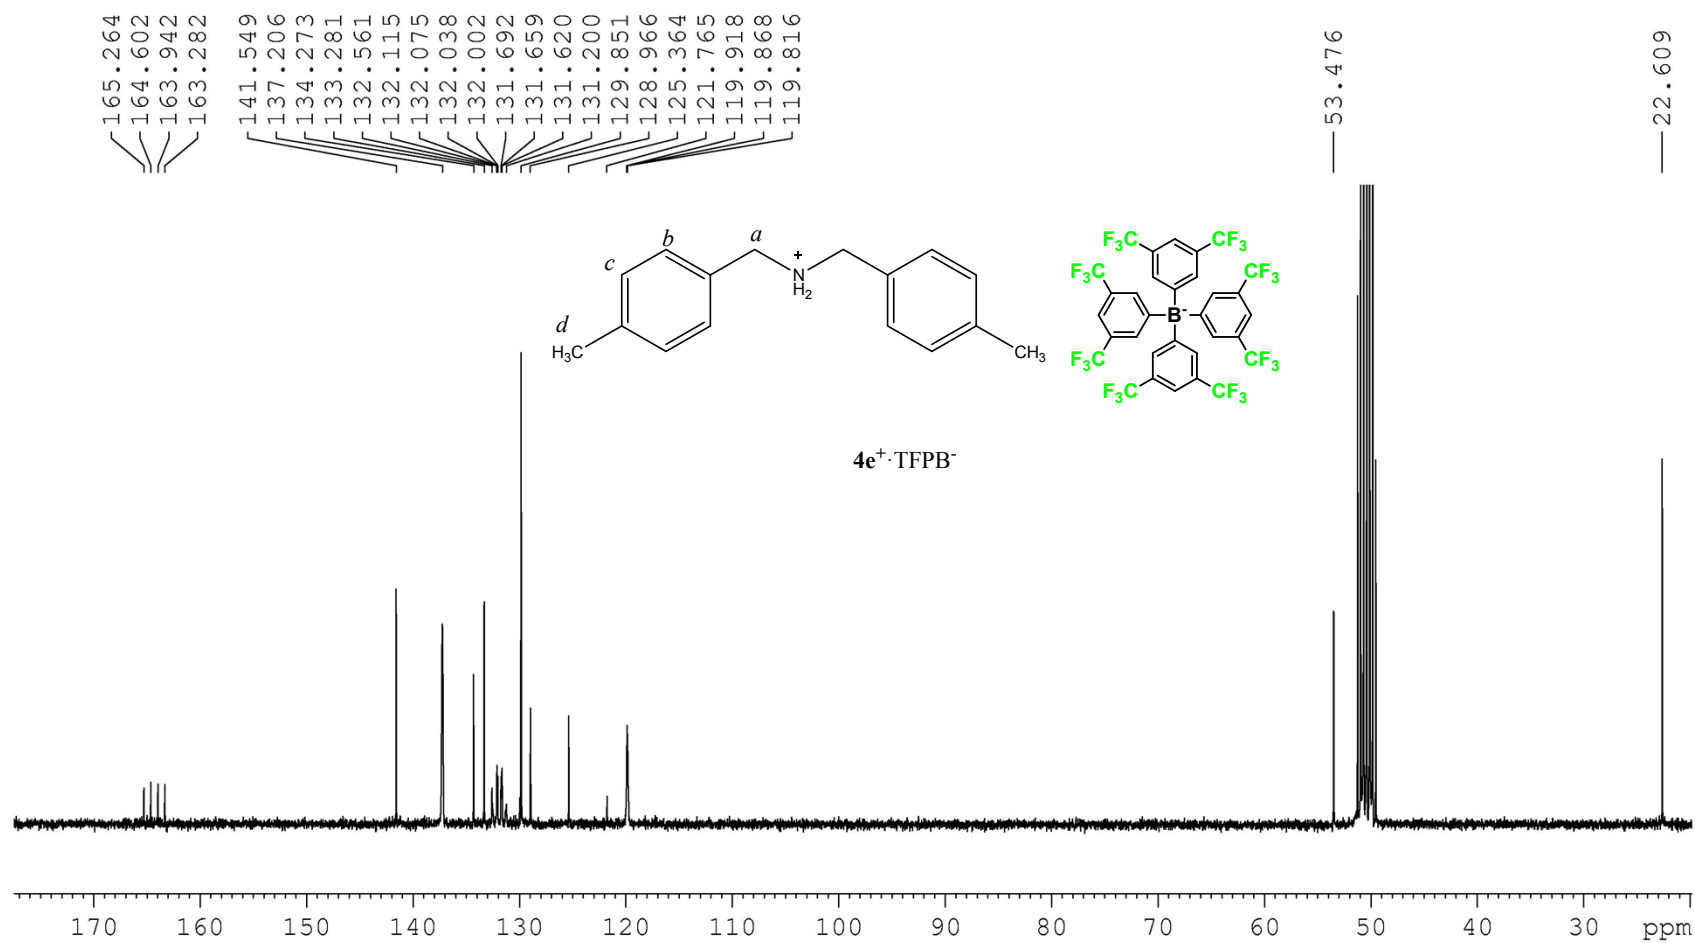

**Figure S30.**  $^{13}\text{C}$  NMR spectrum of derivative  $4\text{e}^+\cdot\text{TFPB}^-$  (75 MHz,  $\text{CD}_3\text{OD}$ , 298 K).

## Preparation of pseudorotaxanes **6a-e<sup>+</sup>** and **7a-d<sup>+</sup>**

Calixarene derivative **1** ( $2.0 \cdot 10^{-3}$  mmol) was dissolved in 0.4 mL of  $\text{CDCl}_3$  ( $5.0 \cdot 10^{-3}$  M solution), then tetrakis[3,5-bis(trifluoromethyl)phenyl]borate salt **3a-d<sup>+</sup>** or **4a-e<sup>+</sup>** ( $2.0 \cdot 10^{-3}$  mmol,  $5 \cdot 10^{-3}$  M) was added and the mixture was stirred for 15 min at 40 °C. After cooling, the solution was transferred in a NMR tube for 1D and 2D NMR spectra acquisition.

## Determination of pseudorotaxane $K_{\text{ass}}$ values by quantitative NMR analysis

Each sample was prepared by dissolving **1** ( $2.45 \times 10^{-3}$  mmol) and tetrakis[3,5-bis(trifluoromethyl)phenyl]borate salt **3a-d<sup>+</sup>** or **4a-e<sup>+</sup>** ( $2.45 \times 10^{-3}$  mmol) in  $\text{CDCl}_3$  (0.4 mL) containing 2  $\mu\text{L}$  of 1,1,2,2-tetrachloroethane ( $d = 1.59$  g/mL) as internal standard. The complex concentration [complex] was evaluated by integration of the  $^1\text{H}$  NMR signal of  $\text{CHCl}_2\text{CHCl}_2$  vs the  $\text{ArCH}_2\text{Ar}$  signals of the complex. The following equation was used to obtain the moles of the complex:

$$\frac{G_a}{G_b} = \frac{F_a}{F_b} \times \frac{N_a}{N_b} \times \frac{M_a}{M_b}$$

where

$G_a$  = grams of 1,1,2,2-tetrachloroethane;

$G_b$  = grams of complex

$F_a$  and  $F_b$  = areas of the signals of 1,1,2,2-tetrachloroethane and  $\text{ArCH}_2\text{Ar}$  signal of the complex.

$N_a$  and  $N_b$  = numbers of nuclei which cause the signals ( $N_a$  for 1,1,2,2-tetrachloroethane;  $N_b$  for complex)

$M_a$  and  $M_b$  = molecular masses of 1,1,2,2-tetrachloroethane (a) and complex (b)

# $^1\text{H}$ NMR spectrum of pseudorotaxane $6\text{b}^+\cdot\text{TFPB}^-$

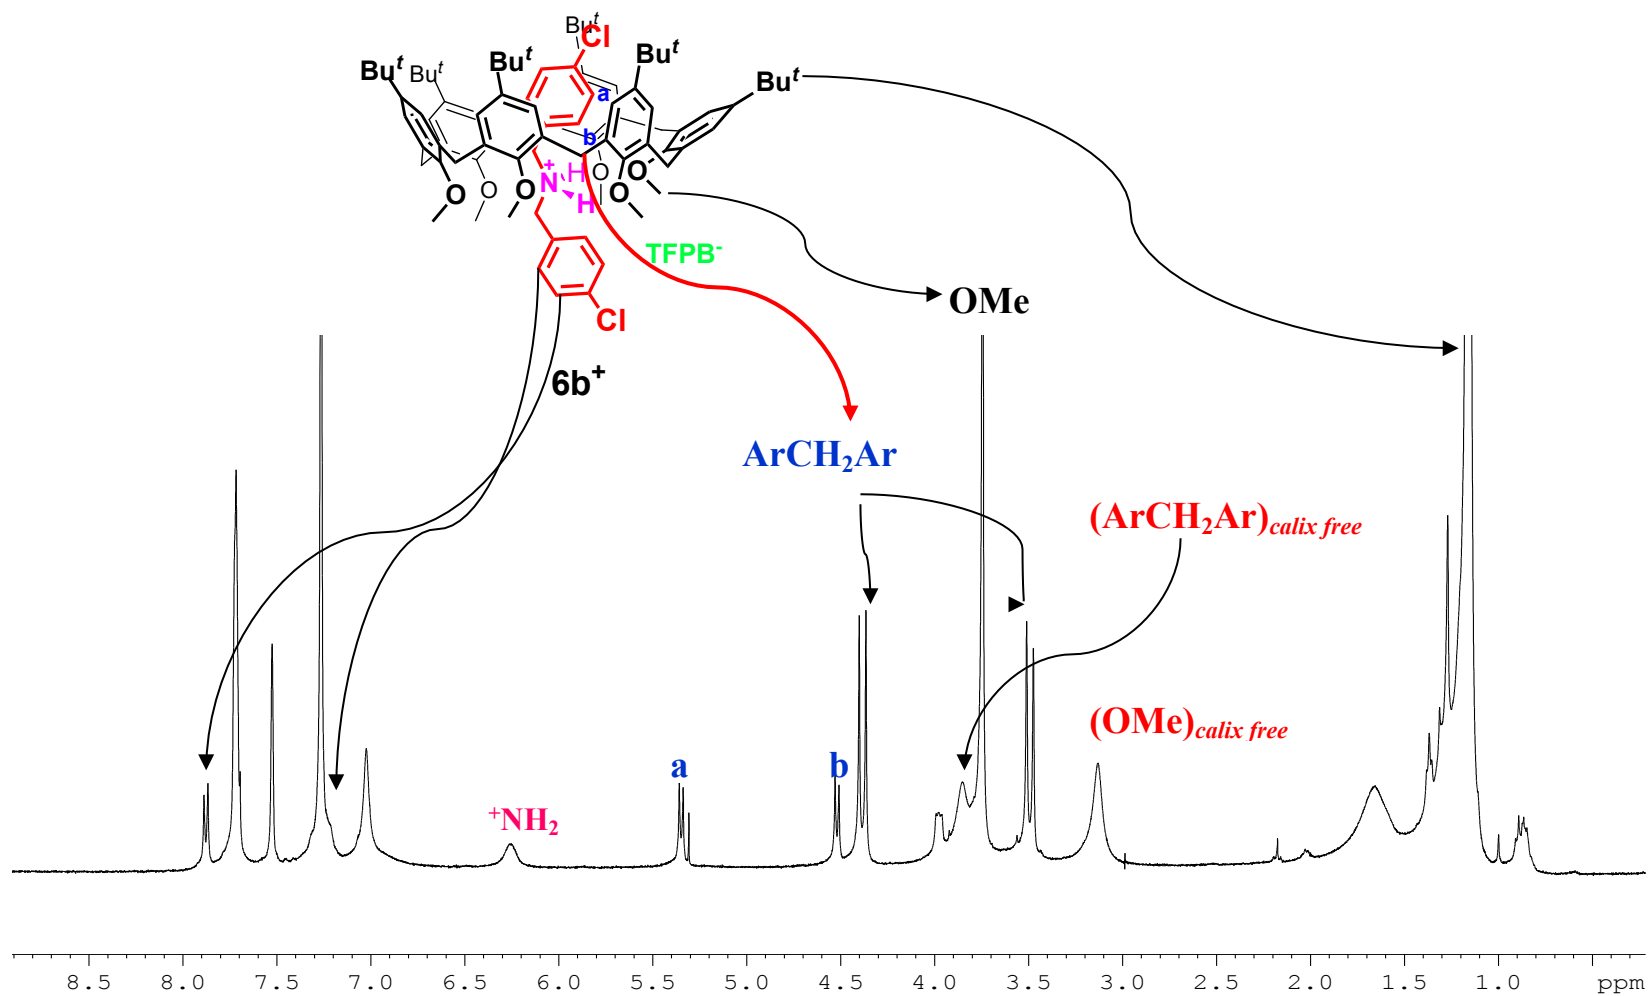

**Figure S31.**  $^1\text{H}$  NMR spectrum (400 MHz,  $\text{CDCl}_3$ , 298 K) of an equimolar solution of  $4\text{b}^+\cdot\text{TFPB}^-$  and **1** ( $5.0\cdot 10^{-3}$  M).

# $^1\text{H}$ NMR spectrum of pseudorotaxane $6\text{c}^+\cdot\text{TFPB}^-$

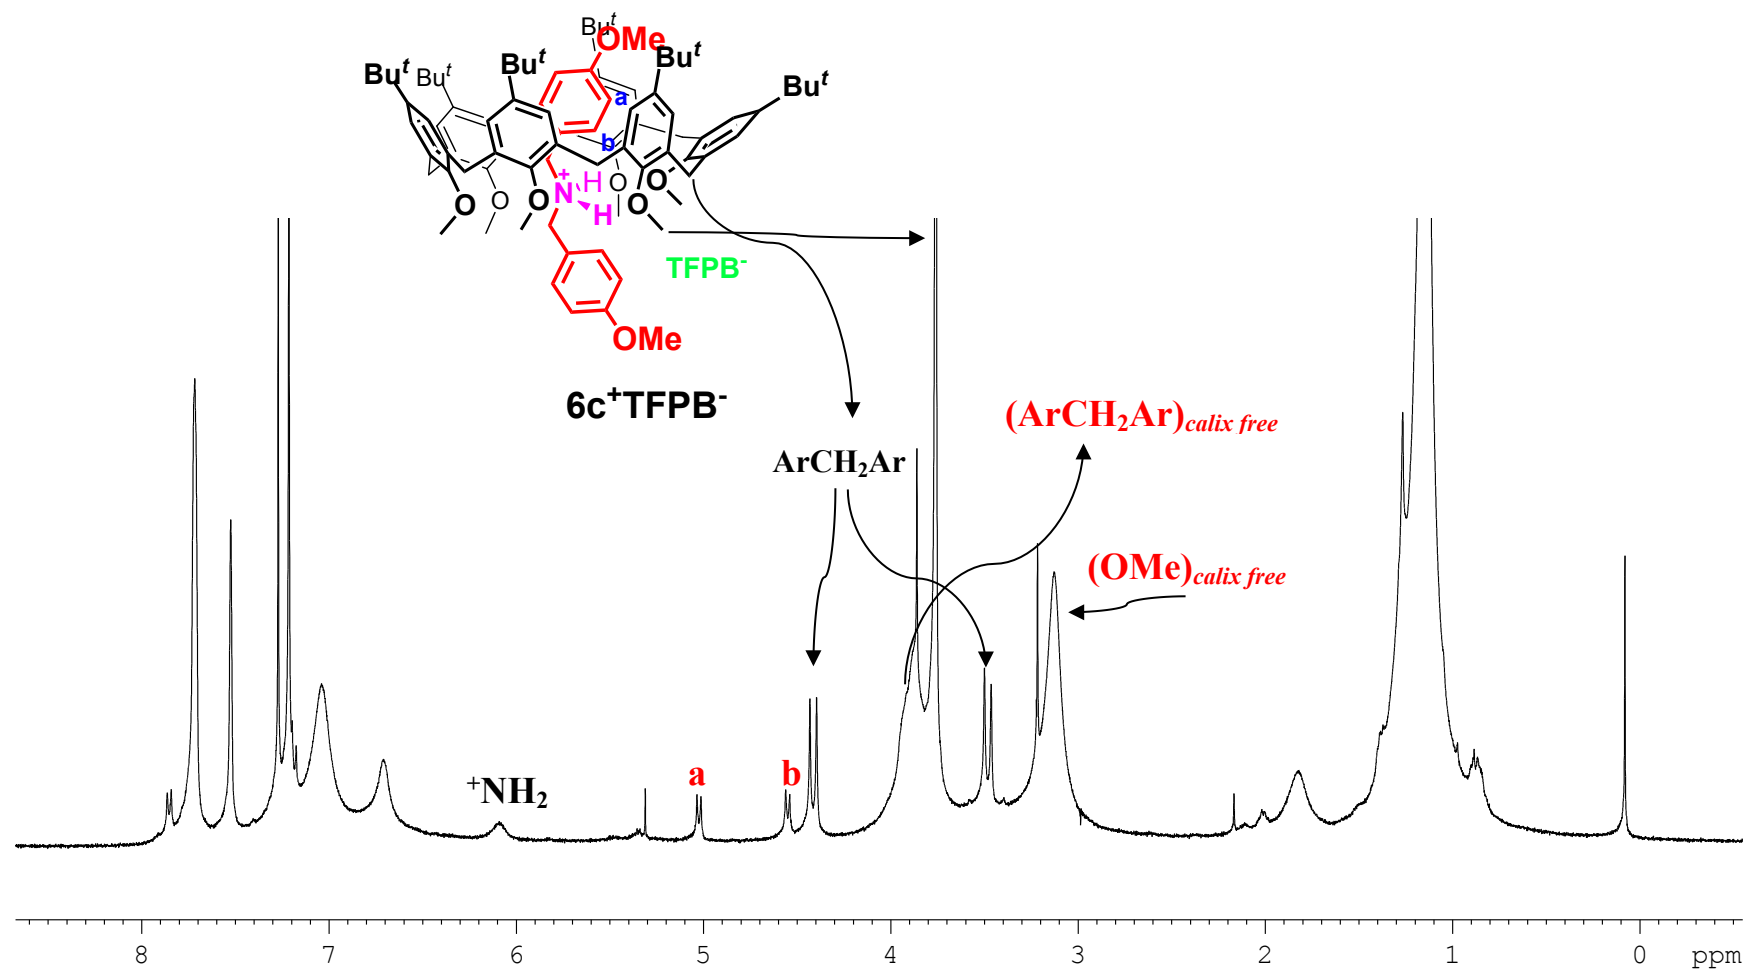

Figure S32.  $^1\text{H}$  NMR spectrum (400 MHz,  $\text{CDCl}_3$ , 298 K) of an equimolar solution of  $4\text{c}^+\cdot\text{TFPB}^-$  and **1** ( $5.0 \cdot 10^{-3}$  M).

# $^1\text{H}$ NMR spectrum of pseudorotaxane $6\text{d}^+\cdot\text{TFPB}^-$

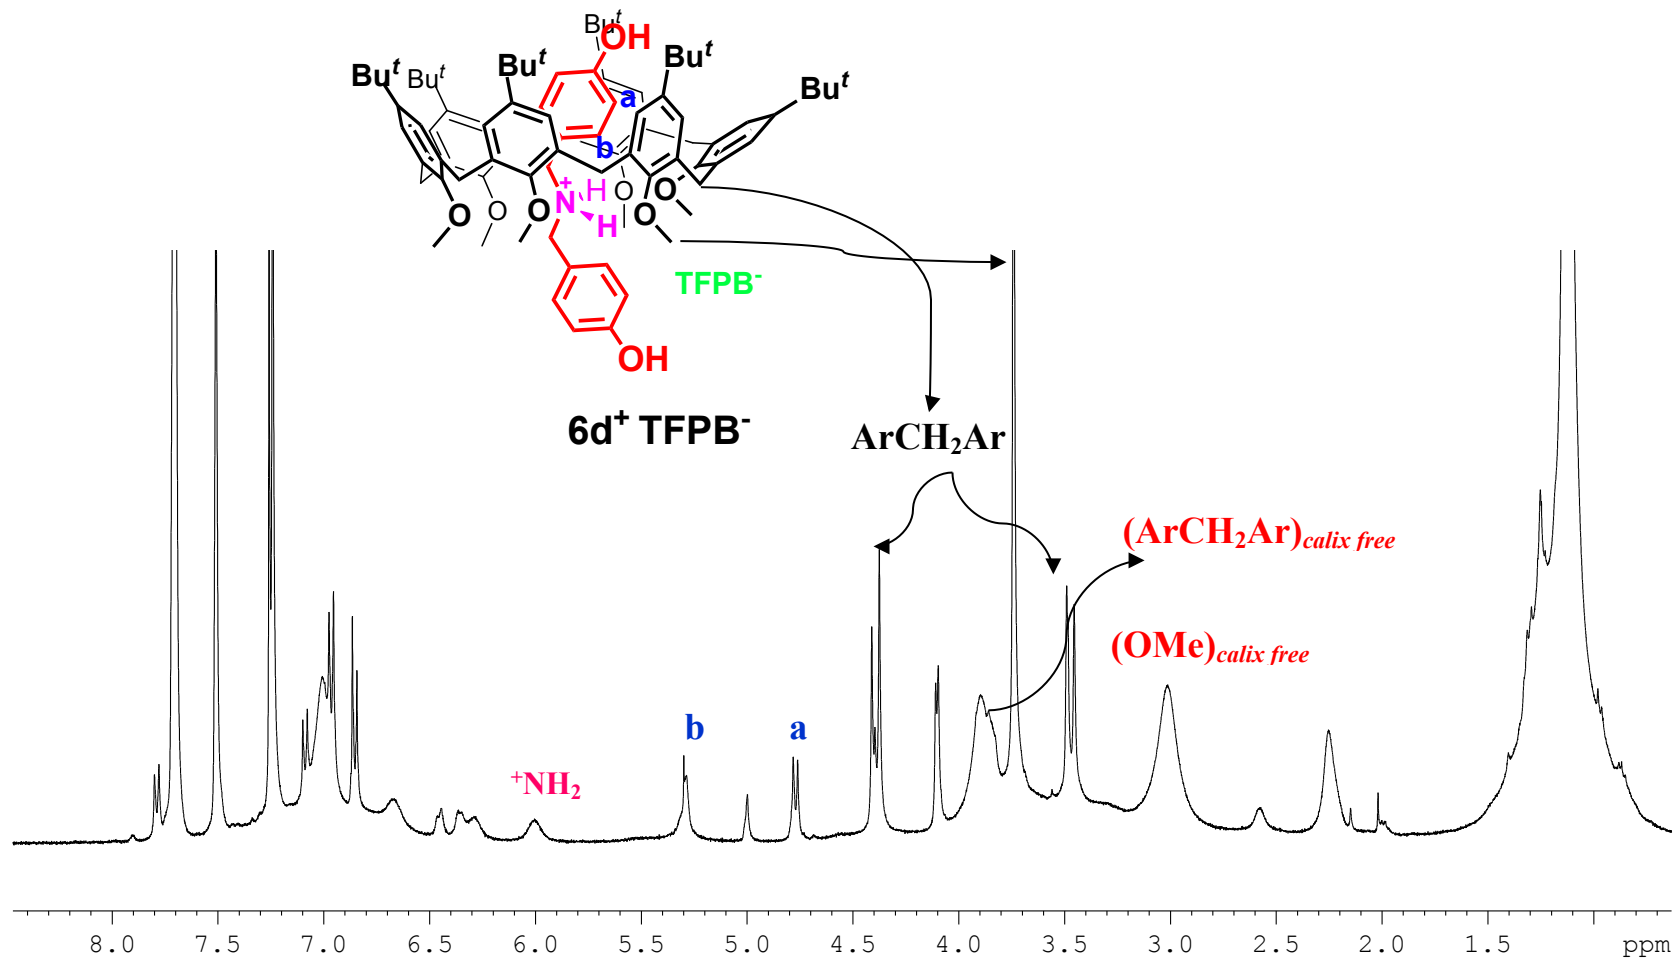

Figure S33.  $^1\text{H}$  NMR spectrum (400 MHz,  $\text{CDCl}_3$ , 298 K) of an equimolar solution of  $6\text{d}^+$  and  $1$  ( $5.0 \cdot 10^{-3}$  M).



# $^1\text{H}$ NMR spectrum of pseudorotaxane $6\text{e}^+\cdot\text{TFPB}^-$

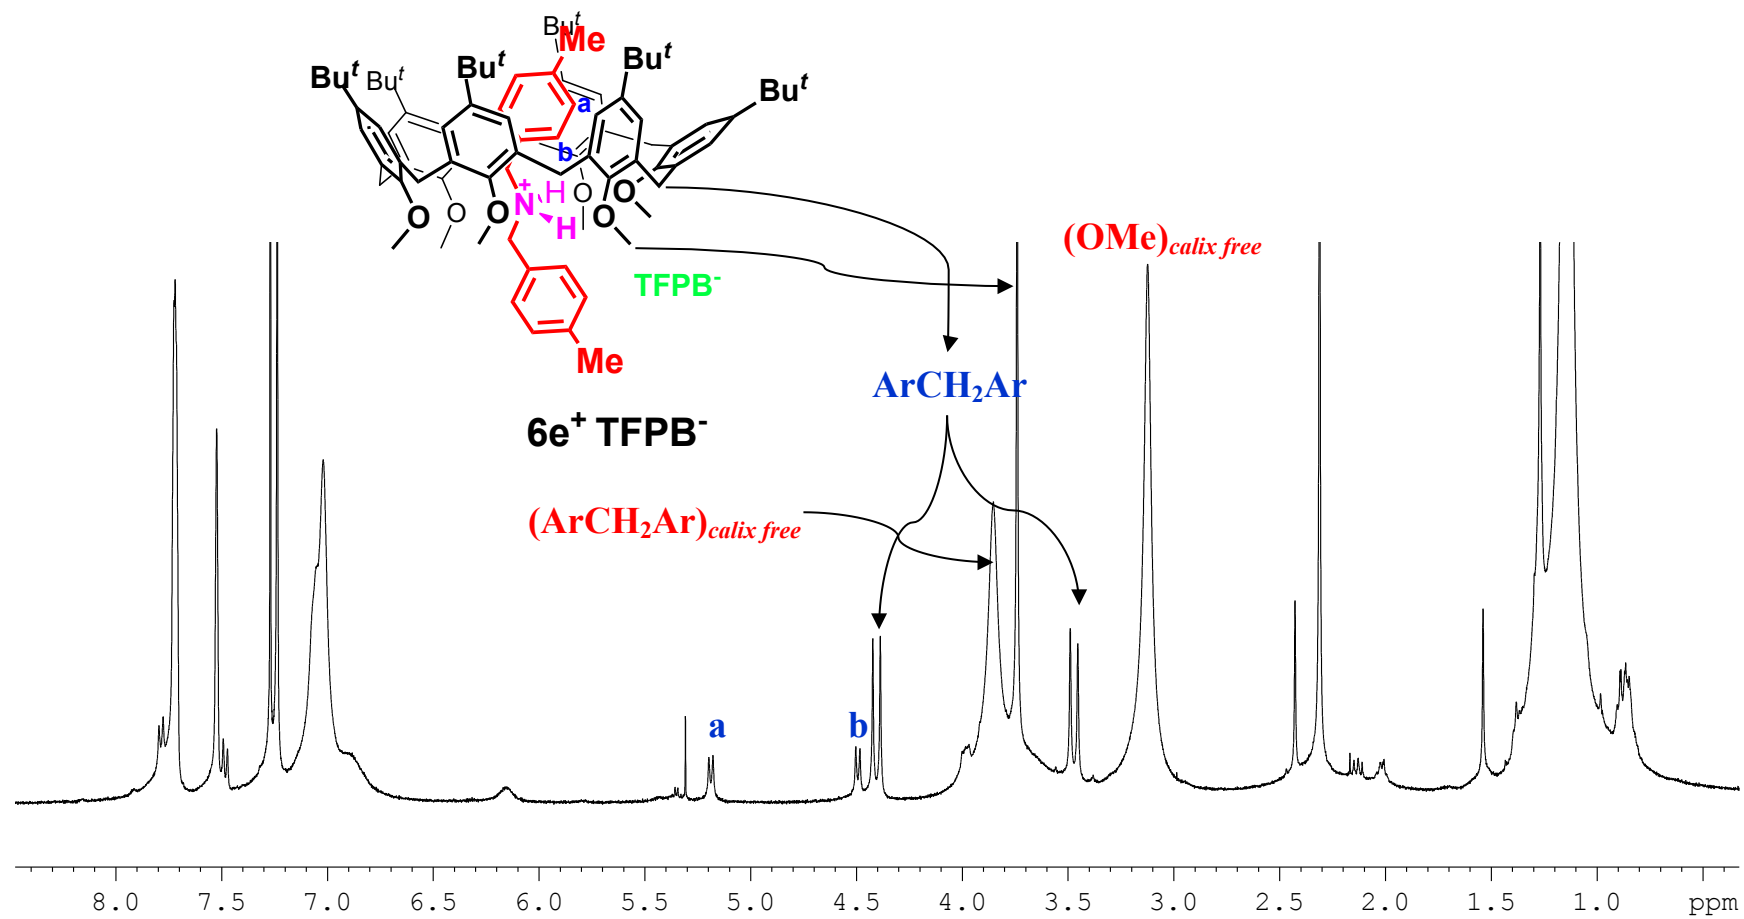

**Figure S34.**  $^1\text{H}$  NMR spectrum (400 MHz,  $\text{CDCl}_3$ , 298 K) of an equimolar solution of  $4\text{e}^+$  and **1** ( $5.0 \cdot 10^{-3}$  M).

## 2D COSY spectrum of an equimolar mixture of 1 and 3a<sup>+</sup>

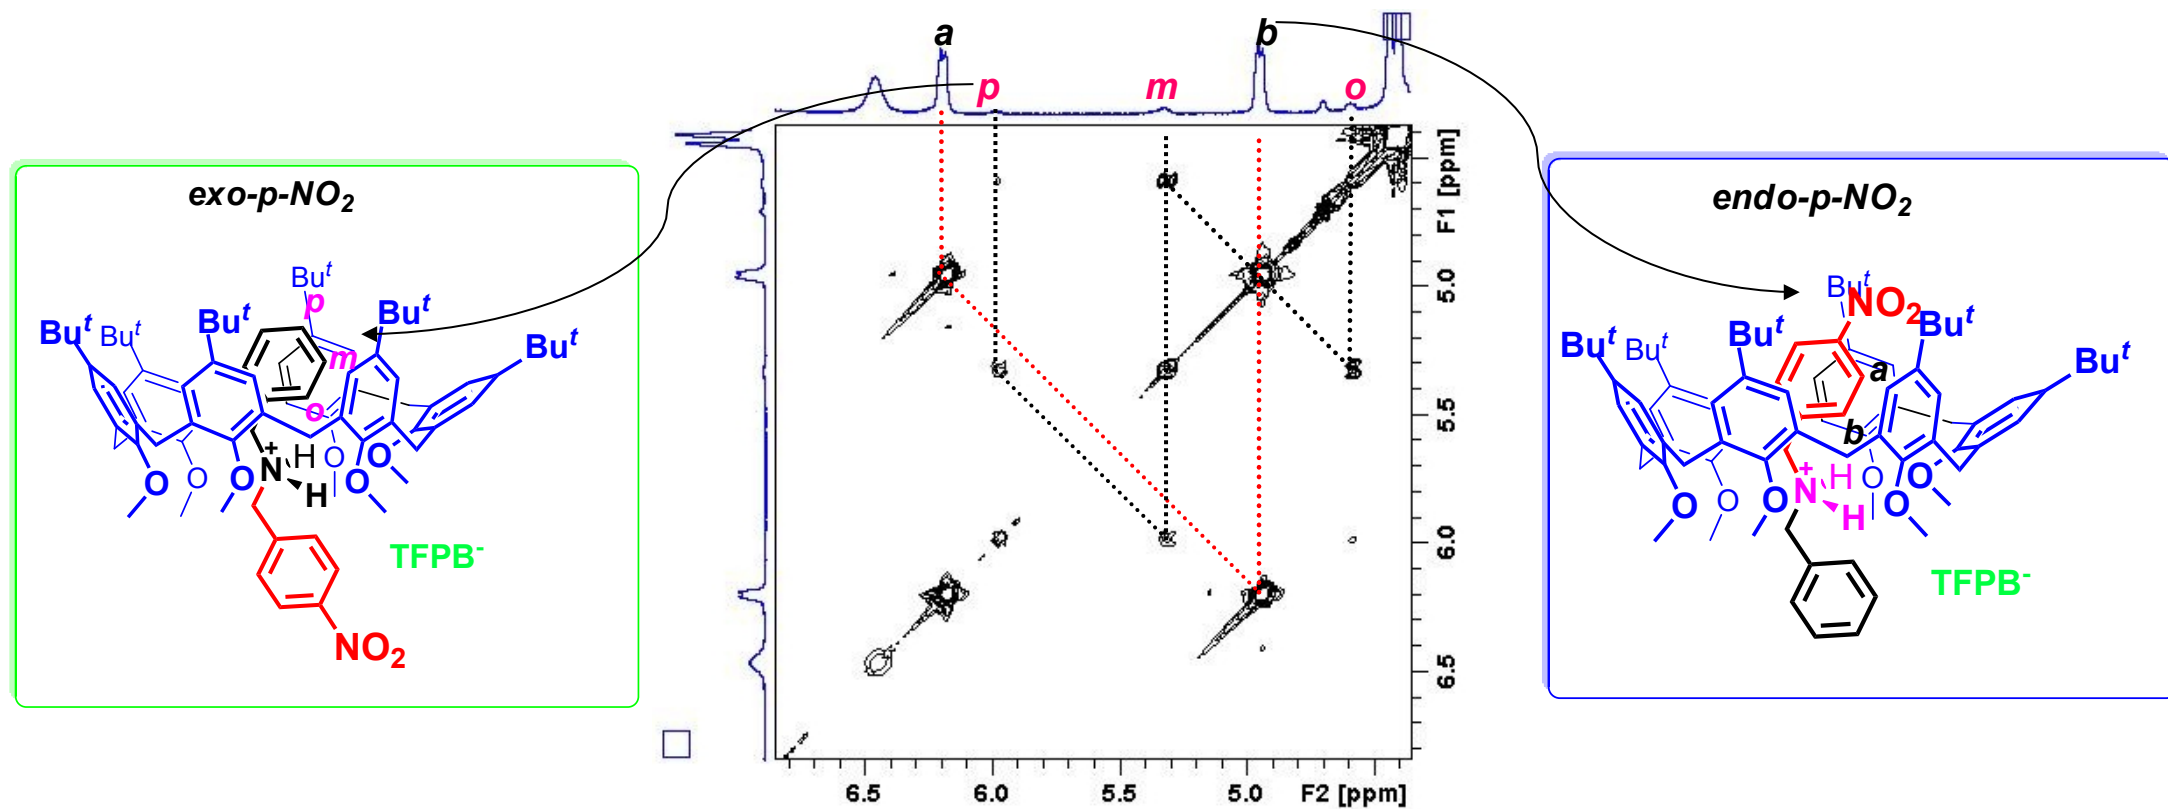

Figure S35. 2D COSY-45 spectrum (400 MHz, CDCl<sub>3</sub>, 298 K) of an equimolar mixture of 3a<sup>+</sup>·TFPB<sup>-</sup> and 1 (5.0×10<sup>-3</sup> M).

## 2D COSY spectrum of an equimolar mixture of 1 and 3b<sup>+</sup>

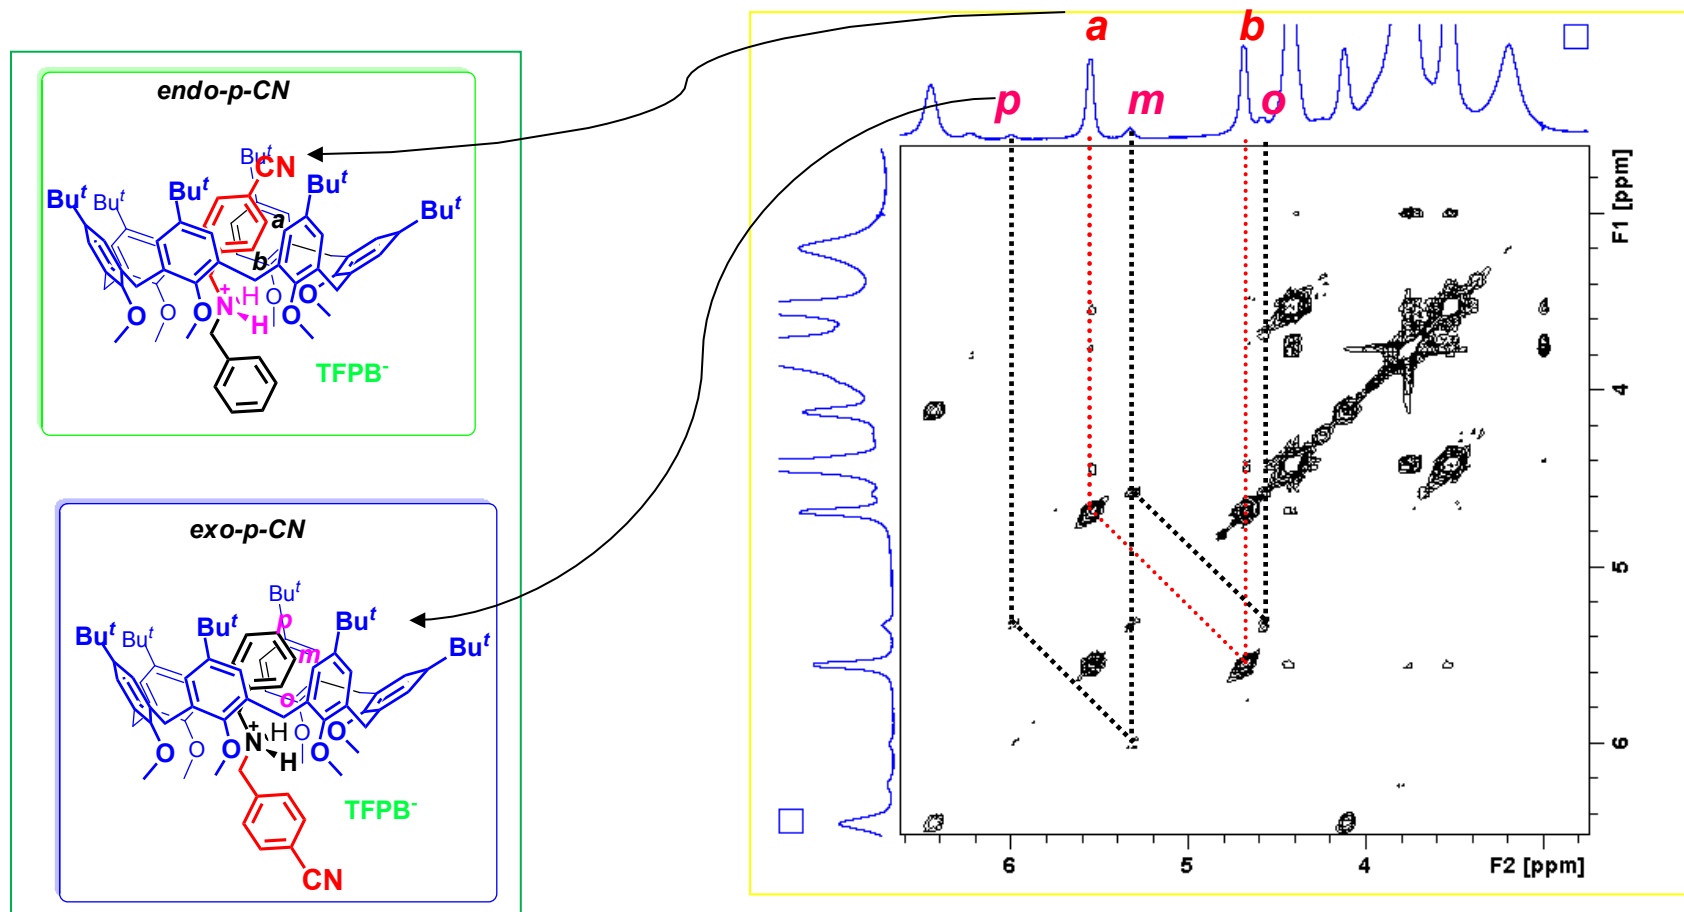

**Figure S36.** Portion of 2D COSY-45 spectrum (400 MHz, CDCl<sub>3</sub>, 298 K) of an equimolar mixture of 3b<sup>+</sup>·TFPB<sup>-</sup> and 1 (5.0×10<sup>-3</sup> M).

## 2D COSY spectrum of an equimolar mixture of 1 and 3c<sup>+</sup>

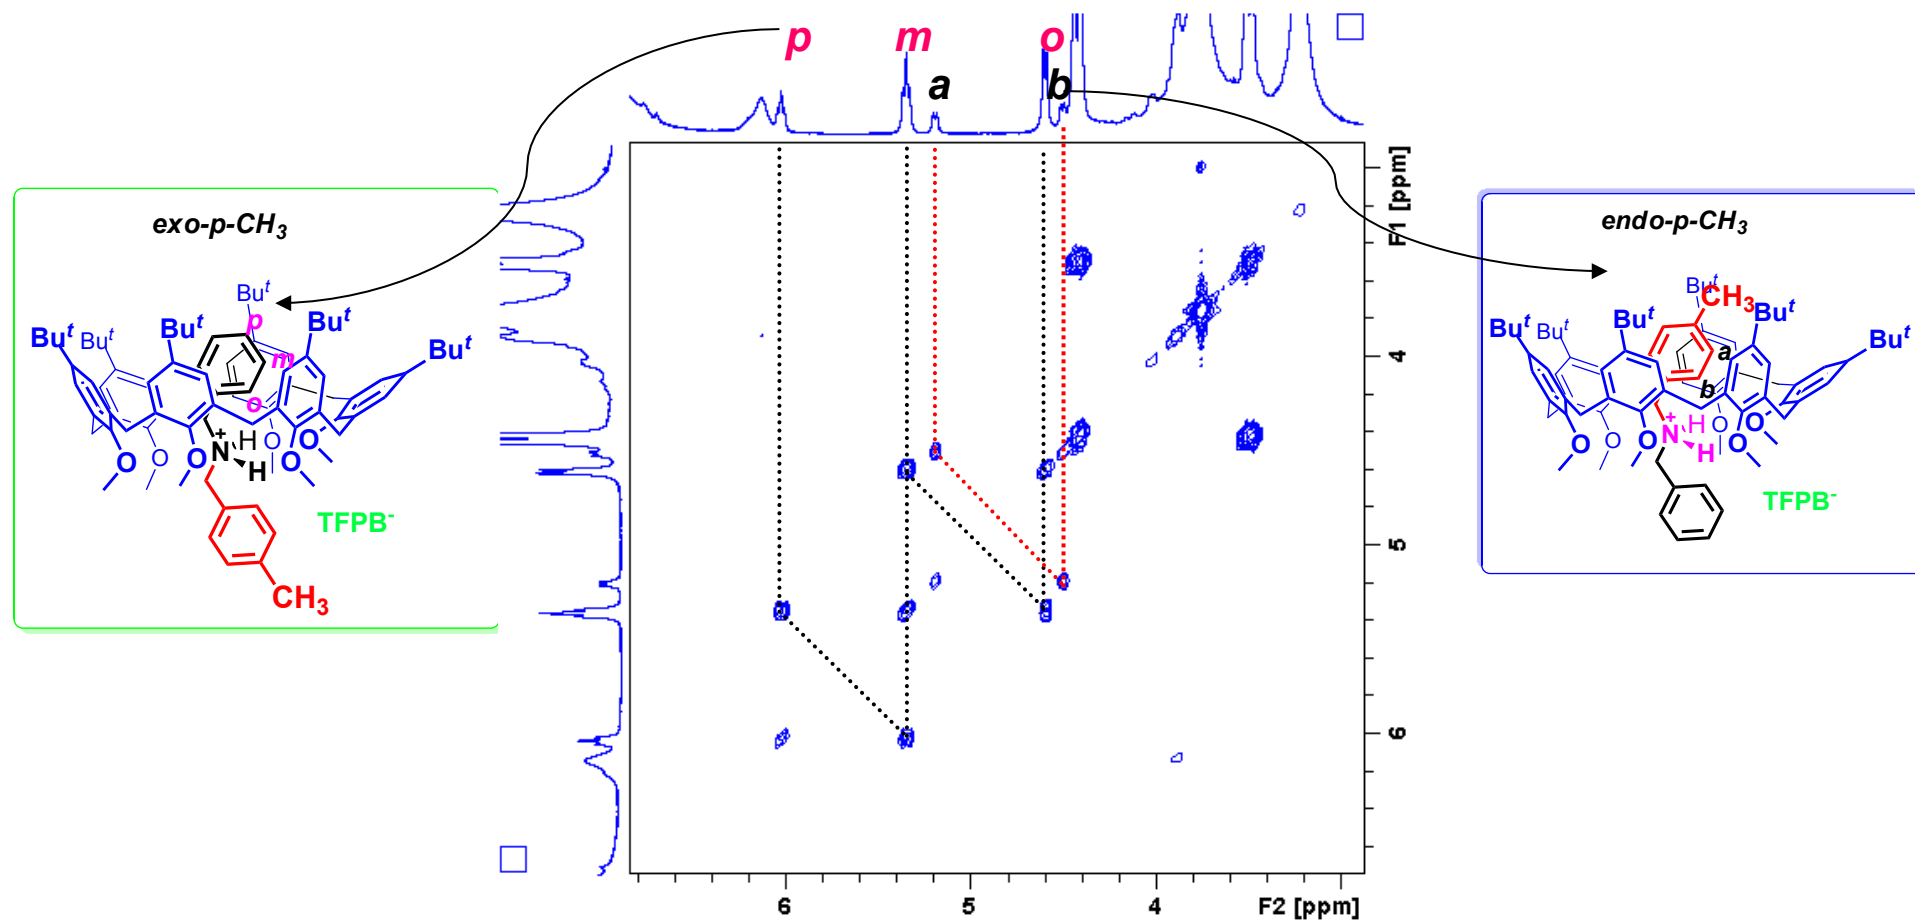

Figure S37. Portion of 2D COSY-45 spectrum (400 MHz, CDCl<sub>3</sub>, 298 K) of an equimolar mixture of 3c<sup>+</sup>·TFPB<sup>-</sup> and 1 (5.0×10<sup>-3</sup> M).

## 2D COSY spectrum of an equimolar mixture of 1 and 3d<sup>+</sup>

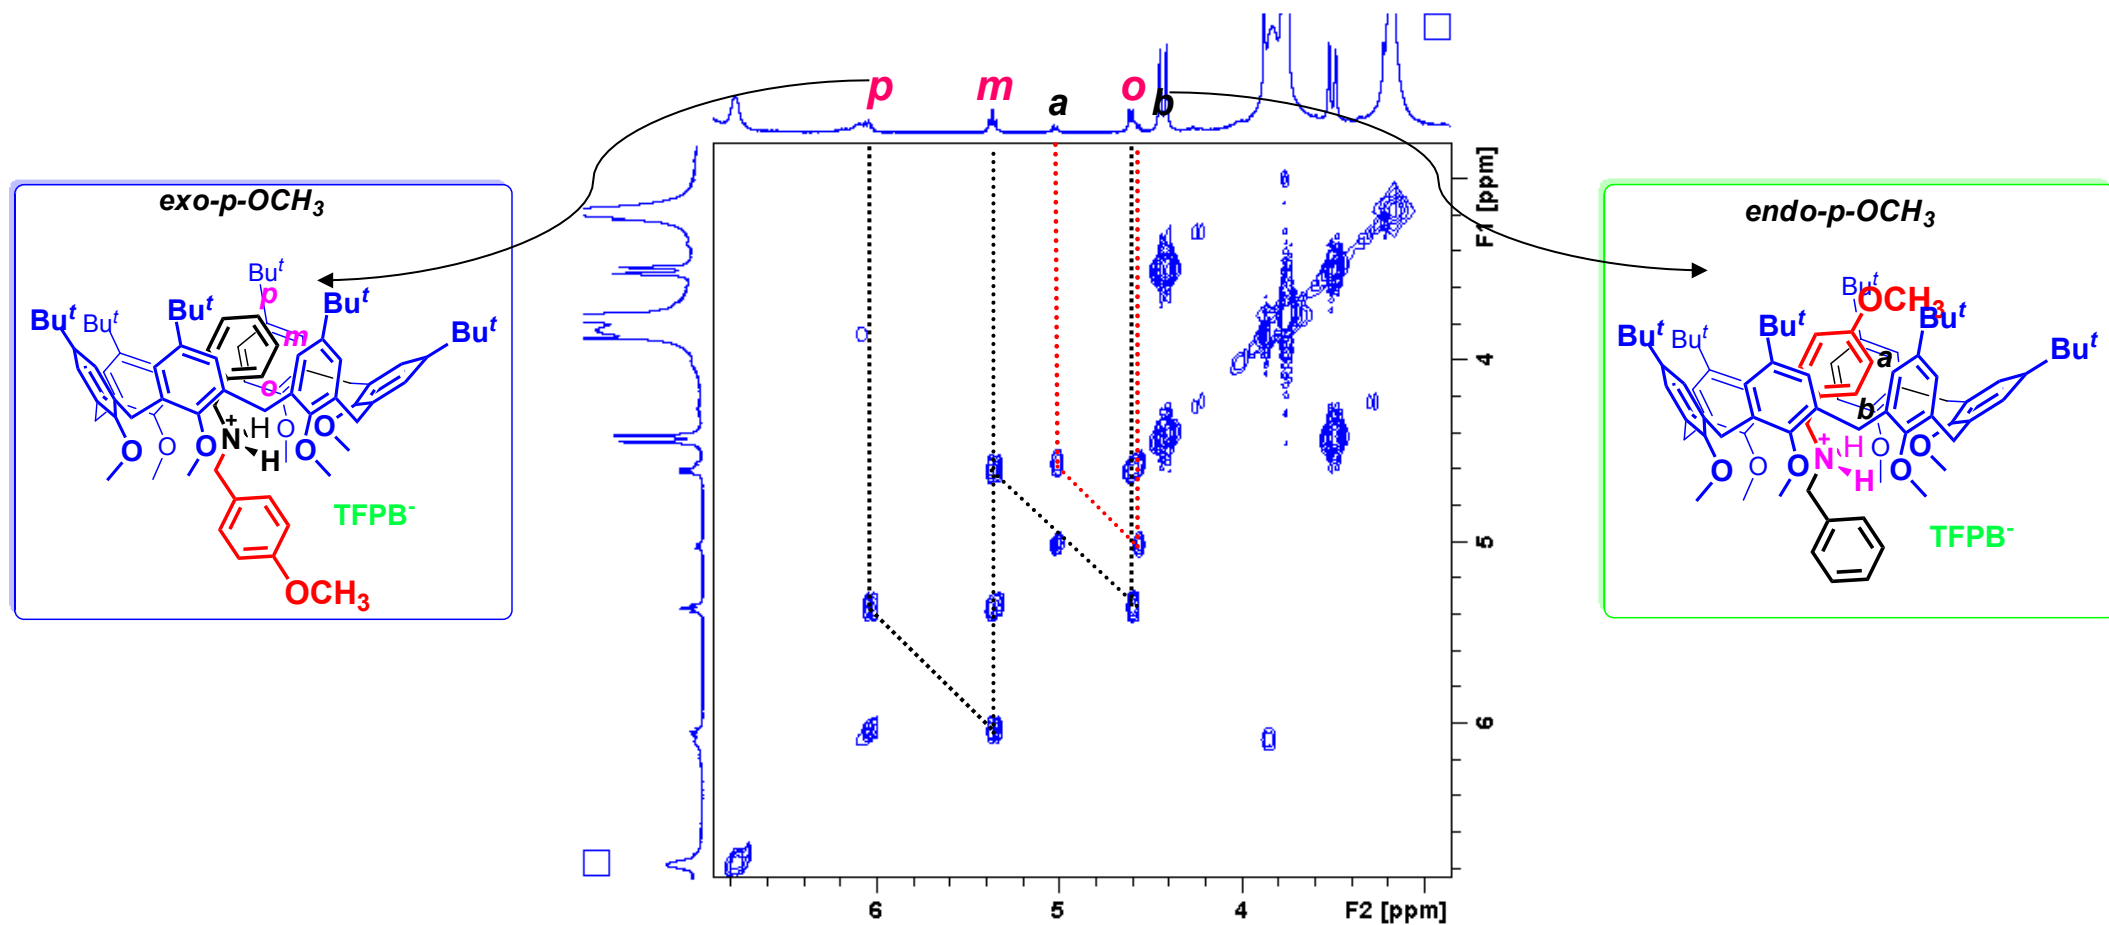

Figure S38. Portion of 2D COSY-45 spectrum (400 MHz, CDCl<sub>3</sub>, 298 K) of of an equimolar mixture of 3d<sup>+</sup>·TFPB<sup>-</sup> and 1 (5.0×10<sup>-3</sup> M).

# Hammett-type plot

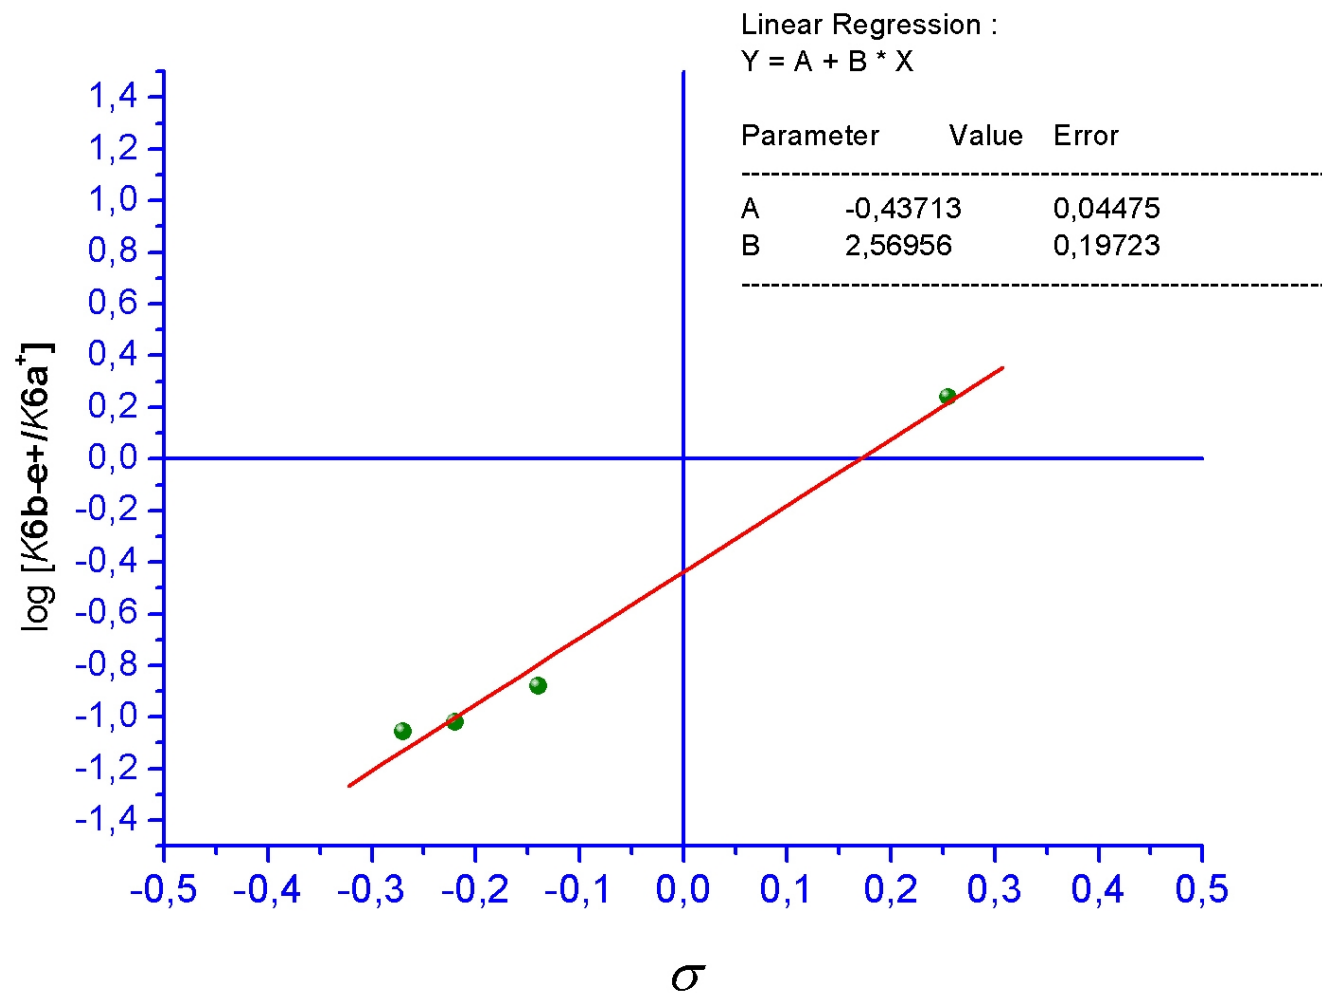

Figure S39. Hammett correlations between  $\log [K_a(6b-e)/K_a(6a)]$  and  $\sigma$ .

## Details of the optimized structure of *endo-p*-NO<sub>2</sub>-benzyl-7a<sup>+</sup> complex

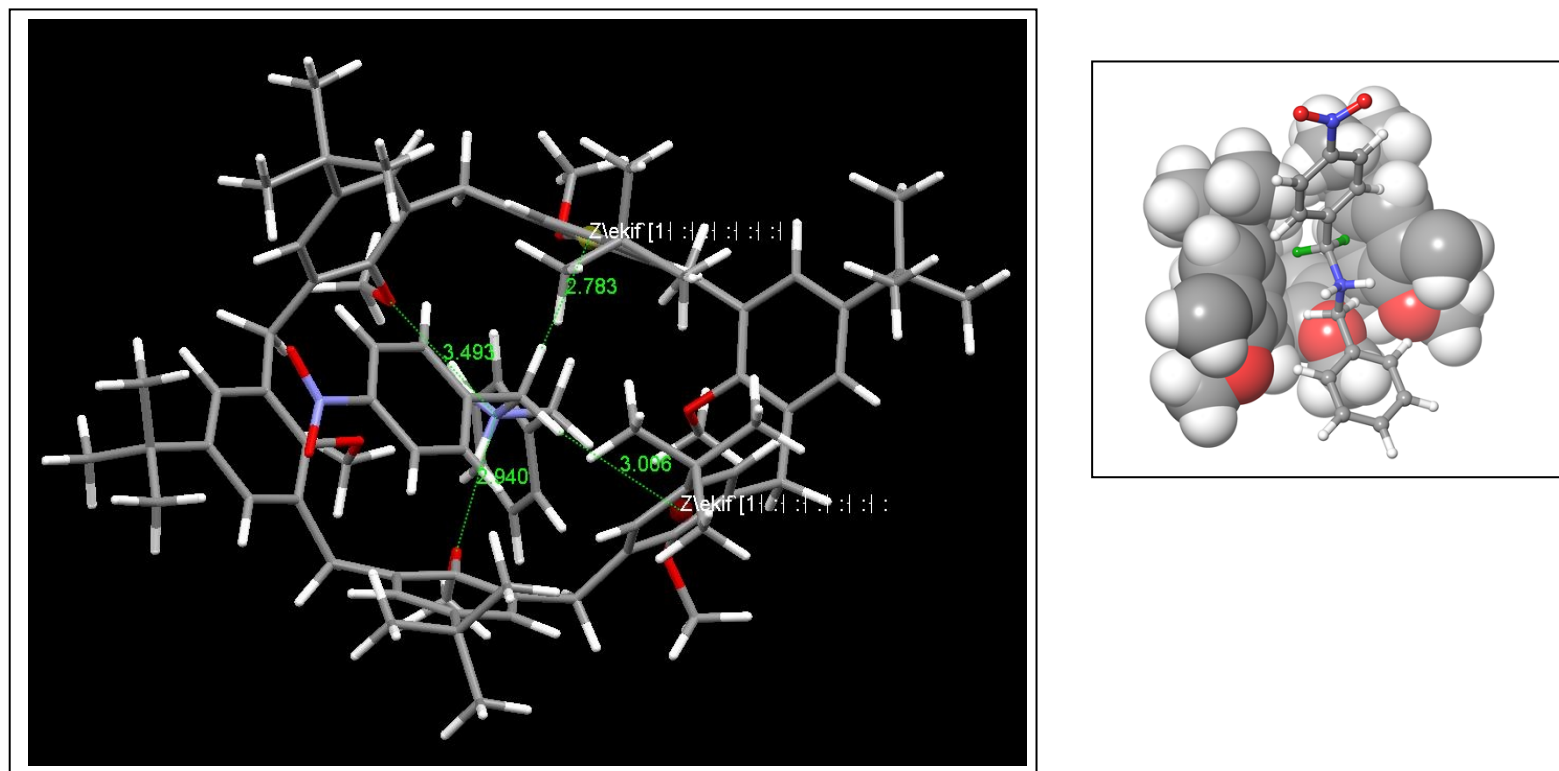

**Figure S40.** (Left) Details of the optimized structure of *endo-p*-NO<sub>2</sub>-benzyl-7a<sup>+</sup> complex at the B3LYP/6-31G(d,p) level of theory, indicating the N<sup>+</sup>...O<sup>calix</sup> and <sup>+</sup>NH<sub>2</sub>C-H...centroids<sup>calix</sup> distances (Å). (Right) Particular showing C-H...π interactions between methylene PhCH<sub>2</sub><sup>+</sup>NH<sub>2</sub>CH<sub>2</sub>Ph-*p*-NO<sub>2</sub> hydrogen atoms of **3a**<sup>+</sup> (in green) and two anisole rings of **1**.

## Details of the optimized structure of *endo*-benzyl-7a<sup>+</sup> complex

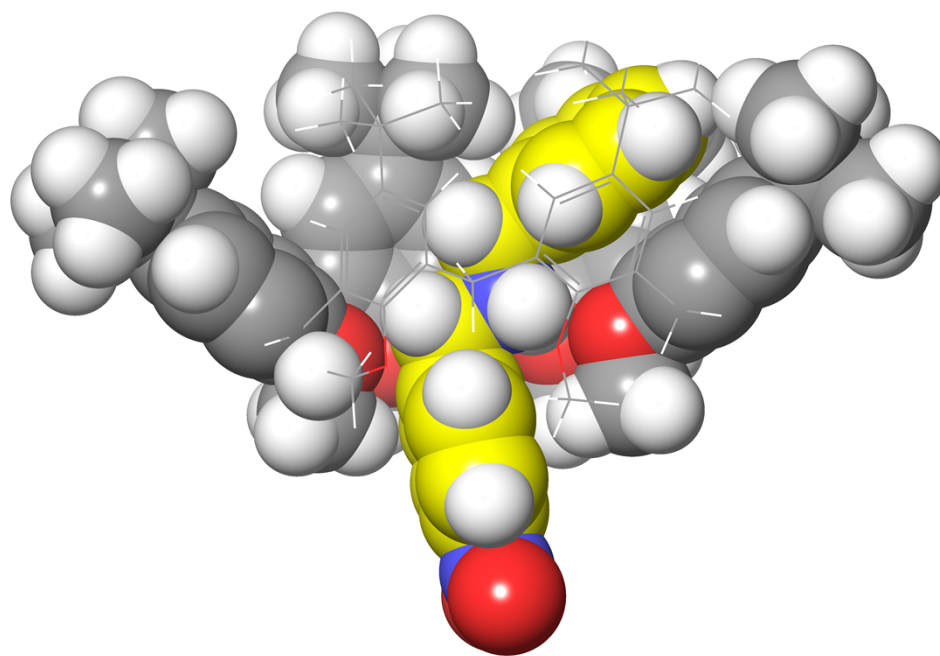

**Figure S41.** Side view of the optimized structures of the *endo*-benzyl-7a<sup>+</sup> complex at the B3LYP/6-31G(d,p) level of theory. A mixed CPK/wireframe representation was used for clarity.



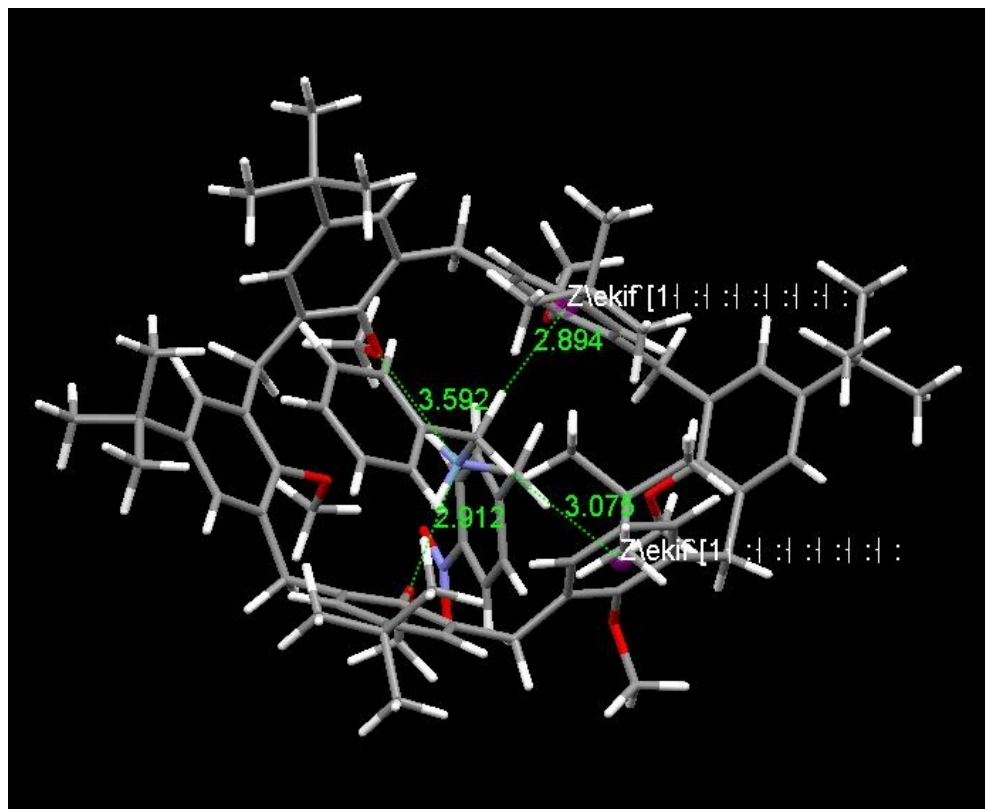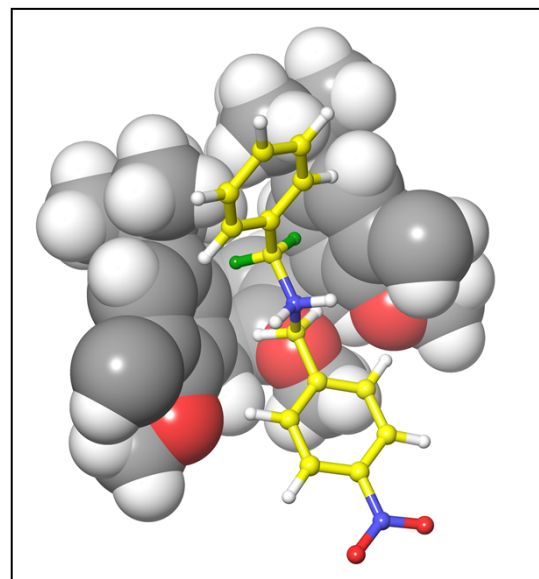

**Figure S42.** (Left) Details of the optimized structure of the *endo*-benzyl-7a<sup>+</sup> complex at the B3LYP/6-31G(d,p) level of theory, indicating the N<sup>+</sup>...O<sup>calix</sup> and <sup>+</sup>NH<sub>2</sub>C-H...centroids<sup>calix</sup> distances (Å). (Right) Particular showing C-H...π interactions between methylene PhCH<sub>2</sub><sup>+</sup>NH<sub>2</sub>CH<sub>2</sub>Ph-*p*-NO<sub>2</sub> hydrogen atoms of 3a<sup>+</sup> (in green) and two anisole rings of 1.

# $^1\text{H}$ NMR titration of hexamethoxy-*p*-NO<sub>2</sub>-calix[6]arene with 4a<sup>+</sup>•TFPB<sup>-</sup>

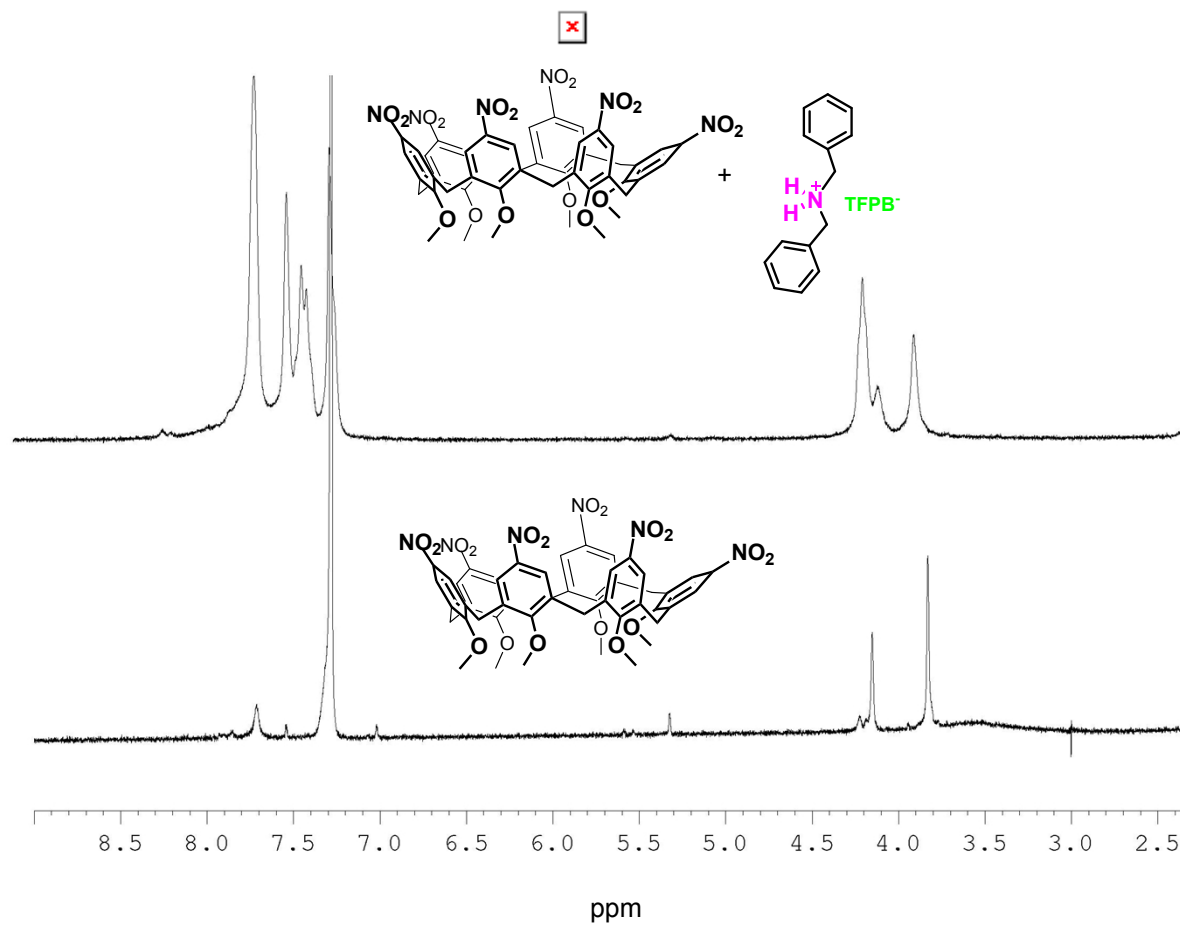

**Figure S43.** Significant portion of the  $^1\text{H}$  NMR spectra (400 MHz, CDCl<sub>3</sub>, 298 K) of: (bottom) hexamethoxy-*p*-NO<sub>2</sub>-calix[6]arene; (top) 1:1 mixture of hexamethoxy-*p*-NO<sub>2</sub>-calix[6]arene and 4a<sup>+</sup>•TFPB<sup>-</sup>.
